# Supplementary material for: Predictors of latent tuberculosis infection treatment completion in the US private sector: an analysis of administrative claims data
Source: BMC Public Health. 2018 May 29;18:662. doi: 10.1186/s12889-018-5578-3 (PMC5975486; doi:10.1186/s12889-018-5578-3)
Supplement: Supplementary file 1 — Excel file detailing the billing codes used in the analyses. Each tab provides information about a different variable. (XLS 385 kb) [file 12889_2018_5578_MOESM1_ESM.xls]

## Sheet: HIV
HIV
An individual was considered to have HIV if he/she had an HIV ICD-9-CM diagnosis code on:
-- ≥1 inpatient facility claim, or
-- ≥2 non-inpatient facility medical claims for ≥2 service dates, excluding transportation and laboratory claims, or
-- 1 non-inpatient medical claims on a service date for which the same patient did not also have a CPT code for HIV-related testing
HIV ICD-9-CM Diagnosis Codes:
042	HUMAN IMMUNODEFICIENCY VIRUS [HIV] DISEASE
042.2	HIV W/SPEC MALIG NEOPLSM
043.0	HIV CAUS LYMPHADENOPATHY
043.9	ARC- UNSPECIFIED
043.2	HIV CAUS OT DISOR IMMUNE
042.9	AIDS- UNSPECIFIED
079.53	HUMAN IMMUNODEFICIENCY VIRUS, TYPE 2 [HIV-2]
V08	ASYMPTOMATIC HUMAN IMMUNODEFICIENCY VIRUS [HIV] INFECTION STATUS
043.1	HIV CAUS SP CNS DISEASE
042.1	HIV CAUS OTH SPEC INFECT
042.0	HIV W/SPECIF INFECTIONS
044.0	HIV CAUS ACUTE INFECTION
043.3	HIV CAUS OTH SPECIF COND
HIV-Related Testing CPT Codes:
86689	ANTIBODY; HTLV/HIV ANTIBODY, CONFIRMATORY TEST
86701	ANTIBODY; HIV-1
86702	ANTIBODY; HIV-2
86703	ANTIBODY; HIV-1 & HIV-2, SINGLE ASSAY
87390	ENZYME IMMUNOASSAY (EIA) QUALITATIVE/SEMIQUANTITATIVE, MULTIPLE STEP; HIV-1
87534	INFECTIOUS AGENT, NUCLEIC ACID (DNA/RNA); HIV-1, DIRECT PROBE
87535	INFECTIOUS AGENT, NUCLEIC ACID (DNA/RNA); HIV-1, AMPLIFIED PROBE
87536	INFECTIOUS AGENT, NUCLEIC ACID (DNA/RNA); HIV-1, QUANTIFICATION

## Sheet: Tobacco Use
Evidence of Tobacco Use
An individual was considered to have evidence of tobacco use if he/she had a tobacco-related ICD-9-CM diagnosis code on:
-- ≥1 inpatient facility claim, or
-- ≥2 non-inpatient facility medical claims for ≥2 service dates, excluding transportation and laboratory claims, or
Or if he/she had ≥1 pharmacy claim for a tobacco-related medication based on National Drug Codes (NDC)
Tobacco-Related ICD-9-CM Codes
305.1	TOBACCO USE DISORDER
305.10	TOBACCO ABUSE-UNSPEC
305.11	TOBACCO ABUSE-CONTINUOUS
305.12	TOBACCO ABUSE-EPISODIC
305.13	TOBACCO ABUSE-IN REMISS
649.00	TOBACCO USE DISORDER COMPLICATING PREGNANCY, CHILDBIRTH, OR THE PUERPERIUM, UNSPECIFIED AS TO EPISODE OF CARE OR NOT APPLICABLE
649.01	TOBACCO USE DISORDER COMPLICATING PREGNANCY, CHILDBIRTH, OR THE PUERPERIUM, DELIVERED, WITH OR WITHOUT MENTION OF ANTEPARTUM CONDITION
649.02	TOBACCO USE DISORDER COMPLICATING PREGNANCY, CHILDBIRTH, OR THE PUERPERIUM, DELIVERED, WITH MENTION OF POSTPARTUM COMPLICATION
649.03	TOBACCO USE DISORDER COMPLICATING PREGNANCY, CHILDBIRTH, OR THE PUERPERIUM, ANTEPARTUM CONDITION OR COMPLICATION
649.04	TOBACCO USE DISORDER COMPLICATING PREGNANCY, CHILDBIRTH, OR THE PUERPERIUM, POSTPARTUM CONDITION OR COMPLICATION
V15.82	PERSONAL HISTORY OF TOBACCO USE
Tobacco-Related NDC Codes
00009519401	Nicotine Nasal Spray 10 MG/ML (0.5 MG/SPRAY)
00009519402	Nicotine Nasal Spray 10 MG/ML (0.5 MG/SPRAY)
00009519501	Nicotine Inhaler System 10 MG (4 MG Delivered)
00009519508	Nicotine Inhaler System 10 MG (4 MG Delivered)
00009519702	Nicotine TD Patch 24HR 15 MG/16HR
00009519707	Nicotine TD Patch 24HR 15 MG/16HR
00009519708	Nicotine TD Patch 24HR 15 MG/16HR
00009526901	Nicotine TD Patch 24HR 5 MG/16HR
00009527001	Nicotine TD Patch 24HR 10 MG/16HR
00009540001	Nicotine Inhaler System 10 MG (4 MG Delivered)
00009540101	Nicotine Nasal Spray 10 MG/ML (0.5 MG/SPRAY)
00045090101	Nicotine Inhaler System 10 MG (4 MG Delivered)
00067021307	Nicotine TD Patch 24HR 7 MG/24HR
00067021314	Nicotine TD Patch 24HR 7 MG/24HR
00067021407	Nicotine TD Patch 24HR 14 MG/24HR
00067021414	Nicotine TD Patch 24HR 14 MG/24HR
00067021507	Nicotine TD Patch 24HR 21 MG/24HR
00067021514	Nicotine TD Patch 24HR 21 MG/24HR
00067021528	Nicotine TD Patch 24HR 21 MG/24HR
00067482007	Nicotine TD Patch 24HR 7 MG/24HR
00067482014	Nicotine TD Patch 24HR 7 MG/24HR
00067488014	Nicotine TD Patch 24HR 7 MG/24HR
00067489007	Nicotine TD Patch 24HR 14 MG/24HR
00067512407	Nicotine TD Patch 24HR 7 MG/24HR
00067512414	Nicotine TD Patch 24HR 7 MG/24HR
00067512507	Nicotine TD Patch 24HR 14 MG/24HR
00067512514	Nicotine TD Patch 24HR 14 MG/24HR
00067512607	Nicotine TD Patch 24HR 21 MG/24HR
00067512614	Nicotine TD Patch 24HR 21 MG/24HR
00067512628	Nicotine TD Patch 24HR 21 MG/24HR
00067560511	Nicotine Polacrilex Gum 2 MG
00067560595	Nicotine Polacrilex Gum 2 MG
00067560611	Nicotine Polacrilex Gum 4 MG
00067560695	Nicotine Polacrilex Gum 4 MG
00067604556	Nicotine TD Patch 24 HR Kit 21-14-7 MG/24HR
00067612814	Nicotine TD Patch 24HR 7 MG/24HR
00067612914	Nicotine TD Patch 24HR 14 MG/24HR
00067613014	Nicotine TD Patch 24HR 21 MG/24HR
00069046856	Varenicline Tartrate Tab 0.5 MG (Base Equiv)
00069046903	Varenicline Tartrate Tab 1 MG (Base Equiv)
00069046912	Varenicline Tartrate Tab 1 MG (Base Equiv)
00069046956	Varenicline Tartrate Tab 1 MG (Base Equiv)
00069046997	Varenicline Tartrate Tab 1 MG (Base Equiv)
00069047102	Varenicline Tartrate Tab 0.5 MG X 11 & Tab 1 MG X 42 Pack
00069047103	Varenicline Tartrate Tab 0.5 MG X 11 & Tab 1 MG X 42 Pack
00069047197	Varenicline Tartrate Tab 0.5 MG X 11 & Tab 1 MG X 42 Pack
00093570301	Bupropion HCl (Smoking Deterrent) Tab SR 12HR 150 MG
00113002960	Nicotine Polacrilex Gum 2 MG
00113017060	Nicotine Polacrilex Gum 4 MG
00113020625	Nicotine Polacrilex Gum 2 MG
00113020660	Nicotine Polacrilex Gum 2 MG
00113034405	Nicotine Polacrilex Lozenge 2 MG
00113034423	Nicotine Polacrilex Lozenge 2 MG
00113042225	Nicotine Polacrilex Gum 4 MG
00113042260	Nicotine Polacrilex Gum 4 MG
00113045678	Nicotine Polacrilex Gum 2 MG
00113053278	Nicotine Polacrilex Gum 4 MG
00113087305	Nicotine Polacrilex Lozenge 4 MG
00113087323	Nicotine Polacrilex Lozenge 4 MG
00135014501	Nicotine TD Patch 24HR 21 MG/24HR
00135014502	Nicotine TD Patch 24HR 21 MG/24HR
00135014601	Nicotine TD Patch 24HR 14 MG/24HR
00135014602	Nicotine TD Patch 24HR 14 MG/24HR
00135014701	Nicotine TD Patch 24HR 7 MG/24HR
00135014702	Nicotine TD Patch 24HR 7 MG/24HR
00135015701	Nicotine Polacrilex Gum 2 MG
00135015702	Nicotine Polacrilex Gum 2 MG
00135015705	Nicotine Polacrilex Gum 2 MG
00135015706	Nicotine Polacrilex Gum 2 MG
00135015707	Nicotine Polacrilex Gum 2 MG
00135015708	Nicotine Polacrilex Gum 2 MG
00135015709	Nicotine Polacrilex Gum 2 MG
00135015710	Nicotine Polacrilex Gum 2 MG
00135015711	Nicotine Polacrilex Gum 2 MG
00135015801	Nicotine Polacrilex Gum 4 MG
00135015802	Nicotine Polacrilex Gum 4 MG
00135015803	Nicotine Polacrilex Gum 4 MG
00135015805	Nicotine Polacrilex Gum 4 MG
00135015806	Nicotine Polacrilex Gum 4 MG
00135015807	Nicotine Polacrilex Gum 4 MG
00135015808	Nicotine Polacrilex Gum 4 MG
00135015809	Nicotine Polacrilex Gum 4 MG
00135015810	Nicotine Polacrilex Gum 4 MG
00135015811	Nicotine Polacrilex Gum 4 MG
00135017001	Nicotine Polacrilex Gum 2 MG
00135017002	Nicotine Polacrilex Gum 2 MG
00135017005	Nicotine Polacrilex Gum 2 MG
00135017006	Nicotine Polacrilex Gum 2 MG
00135017007	Nicotine Polacrilex Gum 2 MG
00135017008	Nicotine Polacrilex Gum 2 MG
00135017009	Nicotine Polacrilex Gum 2 MG
00135017010	Nicotine Polacrilex Gum 2 MG
00135017011	Nicotine Polacrilex Gum 2 MG
00135017101	Nicotine Polacrilex Gum 4 MG
00135017102	Nicotine Polacrilex Gum 4 MG
00135017105	Nicotine Polacrilex Gum 4 MG
00135017106	Nicotine Polacrilex Gum 4 MG
00135017107	Nicotine Polacrilex Gum 4 MG
00135017108	Nicotine Polacrilex Gum 4 MG
00135017109	Nicotine Polacrilex Gum 4 MG
00135017110	Nicotine Polacrilex Gum 4 MG
00135017111	Nicotine Polacrilex Gum 4 MG
00135019401	Nicotine TD Patch 24HR 21 MG/24HR
00135019402	Nicotine TD Patch 24HR 21 MG/24HR
00135019403	Nicotine TD Patch 24HR 21 MG/24HR
00135019405	Nicotine TD Patch 24HR 21 MG/24HR
00135019502	Nicotine TD Patch 24HR 14 MG/24HR
00135019503	Nicotine TD Patch 24HR 14 MG/24HR
00135019505	Nicotine TD Patch 24HR 14 MG/24HR
00135019602	Nicotine TD Patch 24HR 7 MG/24HR
00135019605	Nicotine TD Patch 24HR 7 MG/24HR
00135019701	Nicotine Polacrilex Gum 2 MG
00135019702	Nicotine Polacrilex Gum 2 MG
00135019707	Nicotine Polacrilex Gum 2 MG
00135019801	Nicotine Polacrilex Gum 4 MG
00135019802	Nicotine Polacrilex Gum 4 MG
00135019807	Nicotine Polacrilex Gum 4 MG
00135020801	Nicotine Polacrilex Lozenge 2 MG
00135020803	Nicotine Polacrilex Lozenge 2 MG
00135020807	Nicotine Polacrilex Lozenge 2 MG
00135020901	Nicotine Polacrilex Lozenge 4 MG
00135020903	Nicotine Polacrilex Lozenge 4 MG
00135020907	Nicotine Polacrilex Lozenge 4 MG
00135022501	Nicotine Polacrilex Gum 2 MG
00135022502	Nicotine Polacrilex Gum 2 MG
00135022503	Nicotine Polacrilex Gum 2 MG
00135022601	Nicotine Polacrilex Gum 4 MG
00135022602	Nicotine Polacrilex Gum 4 MG
00135022603	Nicotine Polacrilex Gum 4 MG
00135022904	Nicotine Polacrilex Gum 2 MG
00135022905	Nicotine Polacrilex Gum 2 MG
00135023004	Nicotine Polacrilex Gum 4 MG
00135023005	Nicotine Polacrilex Gum 4 MG
00135024101	Nicotine Polacrilex Gum 2 MG
00135024102	Nicotine Polacrilex Gum 2 MG
00135024103	Nicotine Polacrilex Gum 2 MG
00135024105	Nicotine Polacrilex Gum 2 MG
00135024106	Nicotine Polacrilex Gum 2 MG
00135024108	Nicotine Polacrilex Gum 2 MG
00135024201	Nicotine Polacrilex Gum 4 MG
00135024202	Nicotine Polacrilex Gum 4 MG
00135024203	Nicotine Polacrilex Gum 4 MG
00135024205	Nicotine Polacrilex Gum 4 MG
00135024206	Nicotine Polacrilex Gum 4 MG
00135024208	Nicotine Polacrilex Gum 4 MG
00135045201	Nicotine Polacrilex Lozenge 2 MG
00135045202	Nicotine Polacrilex Lozenge 2 MG
00135045203	Nicotine Polacrilex Lozenge 2 MG
00135045301	Nicotine Polacrilex Lozenge 4 MG
00135045302	Nicotine Polacrilex Lozenge 4 MG
00135045303	Nicotine Polacrilex Lozenge 4 MG
00135046601	Nicotine Polacrilex Gum 2 MG
00135046602	Nicotine Polacrilex Gum 2 MG
00135046603	Nicotine Polacrilex Gum 2 MG
00135046605	Nicotine Polacrilex Gum 2 MG
00135046702	Nicotine Polacrilex Gum 4 MG
00135046703	Nicotine Polacrilex Gum 4 MG
00135046705	Nicotine Polacrilex Gum 4 MG
00135047401	Nicotine Polacrilex Gum 2 MG
00135047402	Nicotine Polacrilex Gum 2 MG
00135047403	Nicotine Polacrilex Gum 2 MG
00135047405	Nicotine Polacrilex Gum 2 MG
00135047407	Nicotine Polacrilex Gum 2 MG
00135047408	Nicotine Polacrilex Gum 2 MG
00135047501	Nicotine Polacrilex Gum 4 MG
00135047502	Nicotine Polacrilex Gum 4 MG
00135047503	Nicotine Polacrilex Gum 4 MG
00135047505	Nicotine Polacrilex Gum 4 MG
00135047507	Nicotine Polacrilex Gum 4 MG
00135047508	Nicotine Polacrilex Gum 4 MG
00135047702	Nicotine Polacrilex Lozenge 2 MG
00135047802	Nicotine Polacrilex Lozenge 4 MG
00135050802	Nicotine Polacrilex Lozenge 2 MG
00135050803	Nicotine Polacrilex Lozenge 2 MG
00135050902	Nicotine Polacrilex Lozenge 4 MG
00135050903	Nicotine Polacrilex Lozenge 4 MG
00135051001	Nicotine Polacrilex Lozenge 2 MG
00135051002	Nicotine Polacrilex Lozenge 2 MG
00135051003	Nicotine Polacrilex Lozenge 2 MG
00135051005	Nicotine Polacrilex Lozenge 2 MG
00135051006	Nicotine Polacrilex Lozenge 2 MG
00135051007	Nicotine Polacrilex Lozenge 2 MG
00135051101	Nicotine Polacrilex Lozenge 4 MG
00135051102	Nicotine Polacrilex Lozenge 4 MG
00135051105	Nicotine Polacrilex Lozenge 4 MG
00135051106	Nicotine Polacrilex Lozenge 4 MG
00135051107	Nicotine Polacrilex Lozenge 4 MG
00135051201	Nicotine Polacrilex Lozenge 2 MG
00135051205	Nicotine Polacrilex Lozenge 2 MG
00135051301	Nicotine Polacrilex Lozenge 4 MG
00135051305	Nicotine Polacrilex Lozenge 4 MG
00135051403	Nicotine Polacrilex Lozenge 2 MG
00135051503	Nicotine Polacrilex Lozenge 4 MG
00173055601	Bupropion HCl (Smoking Deterrent) Tab SR 12HR 150 MG
00173055602	Bupropion HCl (Smoking Deterrent) Tab SR 12HR 150 MG
00363007405	Nicotine Polacrilex Lozenge 2 MG
00363019005	Nicotine Polacrilex Lozenge 4 MG
00363019006	Nicotine Polacrilex Lozenge 4 MG
00363019010	Nicotine Polacrilex Lozenge 4 MG
00363019502	Nicotine TD Patch 24HR 14 MG/24HR
00363019602	Nicotine TD Patch 24HR 7 MG/24HR
00363020105	Nicotine Polacrilex Lozenge 2 MG
00363020176	Nicotine Polacrilex Lozenge 2 MG
00363020801	Nicotine Polacrilex Lozenge 2 MG
00363020807	Nicotine Polacrilex Lozenge 2 MG
00363020901	Nicotine Polacrilex Lozenge 4 MG
00363020907	Nicotine Polacrilex Lozenge 4 MG
00363034408	Nicotine Polacrilex Lozenge 2 MG
00363034410	Nicotine Polacrilex Lozenge 2 MG
00363034423	Nicotine Polacrilex Lozenge 2 MG
00363034444	Nicotine Polacrilex Lozenge 2 MG
00363034467	Nicotine Polacrilex Lozenge 2 MG
00363035260	Nicotine Polacrilex Gum 2 MG
00363035278	Nicotine Polacrilex Gum 2 MG
00363036506	Nicotine Polacrilex Gum 2 MG
00363042013	Nicotine Polacrilex Gum 2 MG
00363042020	Nicotine Polacrilex Gum 2 MG
00363042050	Nicotine Polacrilex Gum 2 MG
00363042062	Nicotine Polacrilex Gum 2 MG
00363042098	Nicotine Polacrilex Gum 2 MG
00363042113	Nicotine Polacrilex Gum 4 MG
00363042120	Nicotine Polacrilex Gum 4 MG
00363042150	Nicotine Polacrilex Gum 4 MG
00363042162	Nicotine Polacrilex Gum 4 MG
00363042198	Nicotine Polacrilex Gum 4 MG
00363042405	Nicotine Polacrilex Lozenge 4 MG
00363042476	Nicotine Polacrilex Lozenge 4 MG
00363042816	Nicotine Polacrilex Gum 2 MG
00363042844	Nicotine Polacrilex Gum 2 MG
00363042849	Nicotine Polacrilex Gum 2 MG
00363042944	Nicotine Polacrilex Gum 4 MG
00363042949	Nicotine Polacrilex Gum 4 MG
00363044602	Nicotine Polacrilex Lozenge 2 MG
00363044603	Nicotine Polacrilex Lozenge 2 MG
00363045658	Nicotine Polacrilex Gum 2 MG
00363045660	Nicotine Polacrilex Gum 2 MG
00363045678	Nicotine Polacrilex Gum 2 MG
00363048044	Nicotine Polacrilex Gum 2 MG
00363048144	Nicotine Polacrilex Gum 4 MG
00363048316	Nicotine Polacrilex Gum 4 MG
00363048344	Nicotine Polacrilex Gum 4 MG
00363048349	Nicotine Polacrilex Gum 4 MG
00363053206	Nicotine Polacrilex Gum 4 MG
00363053258	Nicotine Polacrilex Gum 4 MG
00363053260	Nicotine Polacrilex Gum 4 MG
00363053278	Nicotine Polacrilex Gum 4 MG
00363060962	Nicotine Polacrilex Gum 4 MG
00363060998	Nicotine Polacrilex Gum 4 MG
00363073402	Nicotine Polacrilex Lozenge 2 MG
00363085406	Nicotine Polacrilex Gum 4 MG
00363085460	Nicotine Polacrilex Gum 4 MG
00363087305	Nicotine Polacrilex Lozenge 4 MG
00363087306	Nicotine Polacrilex Lozenge 4 MG
00363087308	Nicotine Polacrilex Lozenge 4 MG
00363087310	Nicotine Polacrilex Lozenge 4 MG
00363087323	Nicotine Polacrilex Lozenge 4 MG
00363087367	Nicotine Polacrilex Lozenge 4 MG
00363089488	Nicotine TD Patch 24HR 7 MG/24HR
00363089588	Nicotine TD Patch 24HR 14 MG/24HR
00363089653	Nicotine TD Patch 24HR 21 MG/24HR
00363089688	Nicotine TD Patch 24HR 21 MG/24HR
00363095702	Nicotine Polacrilex Lozenge 4 MG
00363095704	Nicotine Polacrilex Lozenge 4 MG
00363095705	Nicotine Polacrilex Lozenge 4 MG
00363135206	Nicotine Polacrilex Gum 2 MG
00363135260	Nicotine Polacrilex Gum 2 MG
00363412213	Nicotine Polacrilex Gum 2 MG
00363412220	Nicotine Polacrilex Gum 2 MG
00363412250	Nicotine Polacrilex Gum 2 MG
00363412262	Nicotine Polacrilex Gum 2 MG
00363412298	Nicotine Polacrilex Gum 2 MG
00363414913	Nicotine Polacrilex Gum 4 MG
00363414920	Nicotine Polacrilex Gum 4 MG
00363414950	Nicotine Polacrilex Gum 4 MG
00363414962	Nicotine Polacrilex Gum 4 MG
00363414998	Nicotine Polacrilex Gum 4 MG
00363917002	Nicotine Polacrilex Lozenge 2 MG
00363917102	Nicotine Polacrilex Lozenge 4 MG
00363918001	Nicotine TD Patch 24HR 21 MG/24HR
00363918002	Nicotine TD Patch 24HR 21 MG/24HR
00363920003	Nicotine Polacrilex Lozenge 4 MG
00364289030	Nicotine TD Patch 24HR 7 MG/24HR
00364289330	Nicotine TD Patch 24HR 14 MG/24HR
00364290130	Nicotine TD Patch 24HR 21 MG/24HR
00378552101	Bupropion HCl (Smoking Deterrent) Tab SR 12HR 150 MG
00490006500	Varenicline Tartrate Tab 0.5 MG (Base Equiv)
00490006530	Varenicline Tartrate Tab 0.5 MG (Base Equiv)
00490006556	Varenicline Tartrate Tab 0.5 MG (Base Equiv)
00490006560	Varenicline Tartrate Tab 0.5 MG (Base Equiv)
00490006590	Varenicline Tartrate Tab 0.5 MG (Base Equiv)
00490006600	Varenicline Tartrate Tab 1 MG (Base Equiv)
00490006630	Varenicline Tartrate Tab 1 MG (Base Equiv)
00490006656	Varenicline Tartrate Tab 1 MG (Base Equiv)
00490006660	Varenicline Tartrate Tab 1 MG (Base Equiv)
00490006690	Varenicline Tartrate Tab 1 MG (Base Equiv)
00501630496	Nicotine Inhaler System 10 MG (4 MG Delivered)
00501630604	Nicotine Nasal Spray 10 MG/ML (0.5 MG/SPRAY)
00536103881	Nicotine Polacrilex Lozenge 2 MG
00536103981	Nicotine Polacrilex Lozenge 4 MG
00536110688	Nicotine TD Patch 24HR 7 MG/24HR
00536110788	Nicotine TD Patch 24HR 14 MG/24HR
00536110888	Nicotine TD Patch 24HR 21 MG/24HR
00536136206	Nicotine Polacrilex Gum 2 MG
00536136223	Nicotine Polacrilex Gum 2 MG
00536136234	Nicotine Polacrilex Gum 2 MG
00536137206	Nicotine Polacrilex Gum 4 MG
00536137223	Nicotine Polacrilex Gum 4 MG
00536137234	Nicotine Polacrilex Gum 4 MG
00536302906	Nicotine Polacrilex Gum 2 MG
00536302923	Nicotine Polacrilex Gum 2 MG
00536302934	Nicotine Polacrilex Gum 2 MG
00536303006	Nicotine Polacrilex Gum 4 MG
00536303023	Nicotine Polacrilex Gum 4 MG
00536310606	Nicotine Polacrilex Gum 2 MG
00536310618	Nicotine Polacrilex Gum 2 MG
00536310623	Nicotine Polacrilex Gum 2 MG
00536310634	Nicotine Polacrilex Gum 2 MG
00536310643	Nicotine Polacrilex Gum 2 MG
00536310706	Nicotine Polacrilex Gum 4 MG
00536310718	Nicotine Polacrilex Gum 4 MG
00536310723	Nicotine Polacrilex Gum 4 MG
00536310734	Nicotine Polacrilex Gum 4 MG
00536310743	Nicotine Polacrilex Gum 4 MG
00536311201	Nicotine Polacrilex Gum 2 MG
00536311237	Nicotine Polacrilex Gum 2 MG
00536311301	Nicotine Polacrilex Gum 4 MG
00536311337	Nicotine Polacrilex Gum 4 MG
00536338601	Nicotine Polacrilex Gum 2 MG
00536338637	Nicotine Polacrilex Gum 2 MG
00536338701	Nicotine Polacrilex Gum 4 MG
00536338737	Nicotine Polacrilex Gum 4 MG
00536340401	Nicotine Polacrilex Gum 2 MG
00536340437	Nicotine Polacrilex Gum 2 MG
00536340501	Nicotine Polacrilex Gum 4 MG
00536340537	Nicotine Polacrilex Gum 4 MG
00536589433	Nicotine TD Patch 24HR 7 MG/24HR
00536589488	Nicotine TD Patch 24HR 7 MG/24HR
00536589533	Nicotine TD Patch 24HR 14 MG/24HR
00536589588	Nicotine TD Patch 24HR 14 MG/24HR
00536589633	Nicotine TD Patch 24HR 21 MG/24HR
00536589688	Nicotine TD Patch 24HR 21 MG/24HR
00591086760	Bupropion HCl (Smoking Deterrent) Tab SR 12HR 150 MG
00591086776	Bupropion HCl (Smoking Deterrent) Tab SR 12HR 150 MG
00591289030	Nicotine TD Patch 24HR 7 MG/24HR
00591289054	Nicotine TD Patch 24HR 7 MG/24HR
00591289330	Nicotine TD Patch 24HR 14 MG/24HR
00591289354	Nicotine TD Patch 24HR 14 MG/24HR
00591290130	Nicotine TD Patch 24HR 21 MG/24HR
00591290154	Nicotine TD Patch 24HR 21 MG/24HR
00591354360	Bupropion HCl (Smoking Deterrent) Tab SR 12HR 150 MG
00591354376	Bupropion HCl (Smoking Deterrent) Tab SR 12HR 150 MG
00766004320	Nicotine Polacrilex Gum 2 MG
00766004330	Nicotine Polacrilex Gum 2 MG
00766004340	Nicotine Polacrilex Gum 2 MG
00766004350	Nicotine Polacrilex Gum 2 MG
00766004360	Nicotine Polacrilex Gum 2 MG
00766004420	Nicotine Polacrilex Gum 4 MG
00766004430	Nicotine Polacrilex Gum 4 MG
00766004440	Nicotine Polacrilex Gum 4 MG
00766004450	Nicotine Polacrilex Gum 4 MG
00766004460	Nicotine Polacrilex Gum 4 MG
00766004508	Nicotine Polacrilex Gum 2 MG
00766004548	Nicotine Polacrilex Gum 2 MG
00766004560	Nicotine Polacrilex Gum 2 MG
00766004708	Nicotine Polacrilex Gum 4 MG
00766004748	Nicotine Polacrilex Gum 4 MG
00766004760	Nicotine Polacrilex Gum 4 MG
00766014702	Nicotine TD Patch 24HR 21 MG/24HR
00766140015	Nicotine Polacrilex Lozenge 2 MG
00766140025	Nicotine Polacrilex Lozenge 4 MG
00766142020	Nicotine TD Patch 24HR 21 MG/24HR
00766142050	Nicotine TD Patch 24HR 21 MG/24HR
00766143020	Nicotine TD Patch 24HR 14 MG/24HR
00766144020	Nicotine TD Patch 24HR 7 MG/24HR
00766145010	Nicotine TD Patch 24HR 21 MG/24HR
00766145020	Nicotine TD Patch 24HR 21 MG/24HR
00766146010	Nicotine TD Patch 24HR 14 MG/24HR
00766146020	Nicotine TD Patch 24HR 14 MG/24HR
00766147010	Nicotine TD Patch 24HR 7 MG/24HR
00766147012	Nicotine TD Patch 24HR 7 MG/24HR
00766147020	Nicotine TD Patch 24HR 21 MG/24HR
00766147024	Nicotine TD Patch 24HR 21 MG/24HR
00766150010	Nicotine Polacrilex Lozenge 2 MG
00766150020	Nicotine Polacrilex Lozenge 4 MG
00766150030	Nicotine Polacrilex Lozenge 2 MG
00766150040	Nicotine Polacrilex Lozenge 4 MG
00766150056	Nicotine Polacrilex Lozenge 2 MG
00766150066	Nicotine Polacrilex Lozenge 4 MG
00766155100	Nicotine Polacrilex Lozenge 2 MG
00766155130	Nicotine Polacrilex Lozenge 2 MG
00766155150	Nicotine Polacrilex Lozenge 4 MG
00766155170	Nicotine Polacrilex Lozenge 4 MG
00766286214	Nicotine Polacrilex Gum 2 MG
00766286224	Nicotine Polacrilex Gum 4 MG
00766784320	Nicotine Polacrilex Gum 2 MG
00766784330	Nicotine Polacrilex Gum 2 MG
00766784340	Nicotine Polacrilex Gum 2 MG
00766784350	Nicotine Polacrilex Gum 2 MG
00766784420	Nicotine Polacrilex Gum 4 MG
00766784430	Nicotine Polacrilex Gum 4 MG
00766784440	Nicotine Polacrilex Gum 4 MG
00766784450	Nicotine Polacrilex Gum 4 MG
00766784508	Nicotine Polacrilex Gum 2 MG
00766784548	Nicotine Polacrilex Gum 2 MG
00766784560	Nicotine Polacrilex Gum 2 MG
00766784708	Nicotine Polacrilex Gum 4 MG
00766784720	Nicotine Polacrilex Gum 2 MG
00766784730	Nicotine Polacrilex Gum 2 MG
00766784740	Nicotine Polacrilex Gum 4 MG
00766784748	Nicotine Polacrilex Gum 4 MG
00766784750	Nicotine Polacrilex Gum 4 MG
00766784760	Nicotine Polacrilex Gum 4 MG
00766784957	Nicotine Polacrilex Gum 2 MG
00766784961	Nicotine Polacrilex Gum 4 MG
00766785730	Nicotine Polacrilex Gum 2 MG
00766785740	Nicotine Polacrilex Gum 4 MG
00766785750	Nicotine Polacrilex Gum 2 MG
00766785760	Nicotine Polacrilex Gum 4 MG
00766786755	Nicotine Polacrilex Gum 2 MG
00766786765	Nicotine Polacrilex Gum 4 MG
00781152960	Bupropion HCl (Smoking Deterrent) Tab SR 12HR 150 MG
00781516960	Bupropion HCl (Smoking Deterrent) Tab SR 12HR 150 MG
00904573411	Nicotine Polacrilex Gum 2 MG
00904573451	Nicotine Polacrilex Gum 2 MG
00904573495	Nicotine Polacrilex Gum 2 MG
00904573511	Nicotine Polacrilex Gum 4 MG
00904573551	Nicotine Polacrilex Gum 4 MG
00904573595	Nicotine Polacrilex Gum 4 MG
00904573611	Nicotine Polacrilex Gum 2 MG
00904573651	Nicotine Polacrilex Gum 2 MG
00904573695	Nicotine Polacrilex Gum 2 MG
00904573711	Nicotine Polacrilex Gum 4 MG
00904573751	Nicotine Polacrilex Gum 4 MG
00904573795	Nicotine Polacrilex Gum 4 MG
00904581962	Nicotine Polacrilex Lozenge 2 MG
00904582062	Nicotine Polacrilex Lozenge 4 MG
00904625762	Nicotine Polacrilex Lozenge 2 MG
00904625862	Nicotine Polacrilex Lozenge 4 MG
11110035556	Nicotine TD Patch 24HR 21 MG/24HR
11110035557	Nicotine TD Patch 24HR 21 MG/24HR
11110035558	Nicotine TD Patch 24HR 14 MG/24HR
11110035559	Nicotine TD Patch 24HR 14 MG/24HR
11110035560	Nicotine TD Patch 24HR 7 MG/24HR
11110037083	Nicotine TD Patch 24HR 7 MG/24HR
11673002929	Nicotine Polacrilex Gum 2 MG
11673012405	Nicotine Polacrilex Lozenge 2 MG
11673017029	Nicotine Polacrilex Gum 4 MG
11673019005	Nicotine Polacrilex Lozenge 4 MG
11673019401	Nicotine TD Patch 24HR 21 MG/24HR
11673019402	Nicotine TD Patch 24HR 21 MG/24HR
11673019502	Nicotine TD Patch 24HR 14 MG/24HR
11673019602	Nicotine TD Patch 24HR 7 MG/24HR
11673029401	Nicotine TD Patch 24HR 21 MG/24HR
11673029402	Nicotine TD Patch 24HR 21 MG/24HR
11673029501	Nicotine TD Patch 24HR 14 MG/24HR
11673029601	Nicotine TD Patch 24HR 7 MG/24HR
11673034405	Nicotine Polacrilex Lozenge 2 MG
11673034408	Nicotine Polacrilex Lozenge 2 MG
11673034416	Nicotine Polacrilex Lozenge 2 MG
11673034423	Nicotine Polacrilex Lozenge 2 MG
11673035278	Nicotine Polacrilex Gum 2 MG
11673042225	Nicotine Polacrilex Gum 4 MG
11673044278	Nicotine Polacrilex Gum 4 MG
11673045606	Nicotine Polacrilex Gum 2 MG
11673045678	Nicotine Polacrilex Gum 2 MG
11673053206	Nicotine Polacrilex Gum 4 MG
11673053278	Nicotine Polacrilex Gum 4 MG
11673065702	Nicotine Polacrilex Gum 2 MG
11673065703	Nicotine Polacrilex Gum 2 MG
11673065802	Nicotine Polacrilex Gum 4 MG
11673065803	Nicotine Polacrilex Gum 4 MG
11673077002	Nicotine Polacrilex Gum 2 MG
11673077093	Nicotine Polacrilex Gum 2 MG
11673085478	Nicotine Polacrilex Gum 4 MG
11673087305	Nicotine Polacrilex Lozenge 4 MG
11673087308	Nicotine Polacrilex Lozenge 4 MG
11673087316	Nicotine Polacrilex Lozenge 4 MG
11673087323	Nicotine Polacrilex Lozenge 4 MG
11822024368	Nicotine TD Patch 24HR 11 MG/24HR
11822024369	Nicotine TD Patch 24HR 22 MG/24HR
11822024370	Nicotine TD Patch 24HR 11 MG/24HR
11822024371	Nicotine TD Patch 24HR 22 MG/24HR
11822030946	Nicotine Polacrilex Gum 2 MG
11822030947	Nicotine Polacrilex Gum 4 MG
11822032093	Nicotine Polacrilex Gum 4 MG
11822045259	Nicotine TD Patch 24HR 21 MG/24HR
11822045260	Nicotine TD Patch 24HR 14 MG/24HR
11822045261	Nicotine TD Patch 24HR 21 MG/24HR
11822045262	Nicotine TD Patch 24HR 14 MG/24HR
11822045263	Nicotine TD Patch 24HR 7 MG/24HR
11822085412	Nicotine Polacrilex Gum 2 MG
11822085413	Nicotine Polacrilex Gum 4 MG
11822087287	Nicotine Polacrilex Gum 2 MG
11822087288	Nicotine Polacrilex Gum 2 MG
11822087289	Nicotine Polacrilex Gum 4 MG
11822087291	Nicotine Polacrilex Gum 4 MG
11822243690	Nicotine TD Patch 24HR 22 MG/24HR
11822243700	Nicotine TD Patch 24HR 11 MG/24HR
11822243710	Nicotine TD Patch 24HR 22 MG/24HR
11822253470	Nicotine Polacrilex Gum 2 MG
11822253480	Nicotine Polacrilex Gum 4 MG
11822302870	Nicotine Polacrilex Gum 2 MG
11822302880	Nicotine Polacrilex Gum 4 MG
11822302890	Nicotine Polacrilex Gum 2 MG
11822302900	Nicotine Polacrilex Gum 4 MG
11822309460	Nicotine Polacrilex Gum 2 MG
11822309470	Nicotine Polacrilex Gum 4 MG
11822320920	Nicotine Polacrilex Gum 2 MG
11822320930	Nicotine Polacrilex Gum 4 MG
11822321130	Nicotine Polacrilex Gum 2 MG
11822321140	Nicotine Polacrilex Gum 4 MG
11822323900	Nicotine Polacrilex Lozenge 4 MG
11822323910	Nicotine Polacrilex Lozenge 2 MG
11822353450	Nicotine Polacrilex Gum 4 MG
11822353460	Nicotine Polacrilex Gum 2 MG
11822422240	Nicotine Polacrilex Lozenge 2 MG
11822452590	Nicotine TD Patch 24HR 21 MG/24HR
11822452600	Nicotine TD Patch 24HR 14 MG/24HR
11822452610	Nicotine TD Patch 24HR 21 MG/24HR
11822452620	Nicotine TD Patch 24HR 14 MG/24HR
11822452630	Nicotine TD Patch 24HR 7 MG/24HR
11822522250	Nicotine Polacrilex Lozenge 4 MG
11822558930	Nicotine Polacrilex Gum 2 MG
11822558960	Nicotine Polacrilex Gum 4 MG
11822573120	Nicotine TD Patch 24HR 7 MG/24HR
11822573260	Nicotine Polacrilex Gum 2 MG
11822573270	Nicotine Polacrilex Gum 4 MG
11822573280	Nicotine Polacrilex Lozenge 2 MG
11822573290	Nicotine Polacrilex Lozenge 4 MG
11822575690	Nicotine Polacrilex Gum 4 MG
11822575700	Nicotine Polacrilex Gum 2 MG
11822622240	Nicotine Polacrilex Lozenge 2 MG
11822622250	Nicotine Polacrilex Lozenge 4 MG
11822635690	Nicotine Polacrilex Gum 2 MG
11822655690	Nicotine Polacrilex Gum 4 MG
11822854120	Nicotine Polacrilex Gum 2 MG
11822854130	Nicotine Polacrilex Gum 4 MG
11822872870	Nicotine Polacrilex Gum 2 MG
11822872880	Nicotine Polacrilex Gum 2 MG
11822872890	Nicotine Polacrilex Gum 4 MG
11822872910	Nicotine Polacrilex Gum 4 MG
11917001338	Nicotine TD Patch 24HR 21 MG/24HR
11917001339	Nicotine TD Patch 24HR 21 MG/24HR
11917001342	Nicotine TD Patch 24HR 7 MG/24HR
11917001343	Nicotine TD Patch 24HR 14 MG/24HR
11917001394	Nicotine TD Patch 24HR 14 MG/24HR
11917003194	Nicotine TD Patch 24HR 14 MG/24HR
11917010901	Nicotine TD Patch 24HR 21 MG/24HR
11917010902	Nicotine TD Patch 24HR 21 MG/24HR
11917010904	Nicotine TD Patch 24HR 7 MG/24HR
12333099761	Nicotine TD Patch 24HR 21 MG/24HR
12333099762	Nicotine TD Patch 24HR 21 MG/24HR
12333099771	Nicotine TD Patch 24HR 14 MG/24HR
12333099772	Nicotine TD Patch 24HR 14 MG/24HR
12333099781	Nicotine TD Patch 24HR 7 MG/24HR
19458945701	Nicotine TD Patch 24HR 21 MG/24HR
19458945702	Nicotine TD Patch 24HR 21 MG/24HR
19458945703	Nicotine TD Patch 24HR 7 MG/24HR
19458945704	Nicotine TD Patch 24HR 14 MG/24HR
19458962002	Nicotine TD Patch 24HR 22 MG/24HR
19458964101	Nicotine Polacrilex Gum 2 MG
19458964102	Nicotine Polacrilex Gum 2 MG
19458964103	Nicotine Polacrilex Gum 2 MG
19458964201	Nicotine Polacrilex Gum 4 MG
19458964202	Nicotine Polacrilex Gum 4 MG
21130034405	Nicotine Polacrilex Lozenge 2 MG
21130035278	Nicotine Polacrilex Gum 2 MG
21130045678	Nicotine Polacrilex Gum 2 MG
21130053278	Nicotine Polacrilex Gum 4 MG
21130085478	Nicotine Polacrilex Gum 4 MG
21130087305	Nicotine Polacrilex Lozenge 4 MG
21695063356	Varenicline Tartrate Tab 0.5 MG (Base Equiv)
21695094553	Varenicline Tartrate Tab 0.5 MG X 11 & Tab 1 MG X 42 Pack
21695094656	Varenicline Tartrate Tab 1 MG (Base Equiv)
23490001001	Nicotine Polacrilex Gum 2 MG
23490001101	Nicotine Polacrilex Gum 4 MG
23490001201	Nicotine Polacrilex Lozenge 2 MG
23490001301	Nicotine Polacrilex Lozenge 4 MG
23490973101	Varenicline Tartrate Tab 0.5 MG X 11 & Tab 1 MG X 42 Pack
23490973102	Varenicline Tartrate Tab 1 MG (Base Equiv)
24385017058	Nicotine Polacrilex Gum 2 MG
24385017158	Nicotine Polacrilex Gum 4 MG
24385044010	Nicotine TD Patch 24HR 11 MG/24HR
24385044074	Nicotine TD Patch 24HR 11 MG/24HR
24385059471	Nicotine Polacrilex Gum 2 MG
24385059771	Nicotine Polacrilex Gum 2 MG
24385059871	Nicotine Polacrilex Gum 4 MG
24385059971	Nicotine Polacrilex Gum 4 MG
24385068410	Nicotine TD Patch 24HR 22 MG/24HR
24385068474	Nicotine TD Patch 24HR 22 MG/24HR
24385097567	Nicotine Polacrilex Lozenge 2 MG
24385097667	Nicotine Polacrilex Lozenge 4 MG
30142002925	Nicotine Polacrilex Gum 2 MG
30142017025	Nicotine Polacrilex Gum 4 MG
30142020625	Nicotine Polacrilex Gum 2 MG
30142034405	Nicotine Polacrilex Lozenge 2 MG
30142035278	Nicotine Polacrilex Gum 2 MG
30142042225	Nicotine Polacrilex Gum 4 MG
30142045678	Nicotine Polacrilex Gum 2 MG
30142053278	Nicotine Polacrilex Gum 4 MG
30142085478	Nicotine Polacrilex Gum 4 MG
30142087305	Nicotine Polacrilex Lozenge 4 MG
34575074447	Nicotine TD Patch 24HR 21 MG/24HR
34575074457	Nicotine TD Patch 24HR 7 MG/24HR
34575074471	Nicotine TD Patch 24HR 14 MG/24HR
35356001107	Varenicline Tartrate Tab 0.5 MG (Base Equiv)
35356001114	Varenicline Tartrate Tab 0.5 MG (Base Equiv)
35356001156	Varenicline Tartrate Tab 0.5 MG (Base Equiv)
35356001207	Varenicline Tartrate Tab 1 MG (Base Equiv)
35356001214	Varenicline Tartrate Tab 1 MG (Base Equiv)
35356001256	Varenicline Tartrate Tab 1 MG (Base Equiv)
35356017456	Varenicline Tartrate Tab 1 MG (Base Equiv)
35356017553	Varenicline Tartrate Tab 0.5 MG X 11 & Tab 1 MG X 42 Pack
35356059714	Nicotine TD Patch 24HR 7 MG/24HR
35356059814	Nicotine TD Patch 24HR 14 MG/24HR
35356059914	Nicotine TD Patch 24HR 21 MG/24HR
36800002925	Nicotine Polacrilex Gum 2 MG
36800017025	Nicotine Polacrilex Gum 4 MG
36800017071	Nicotine Polacrilex Gum 4 MG
36800020625	Nicotine Polacrilex Gum 2 MG
36800033604	Nicotine TD Patch 24HR 22 MG/24HR
36800033605	Nicotine TD Patch 24HR 22 MG/24HR
36800033617	Nicotine TD Patch 24HR 11 MG/24HR
36800034405	Nicotine Polacrilex Lozenge 2 MG
36800035278	Nicotine Polacrilex Gum 2 MG
36800042271	Nicotine Polacrilex Gum 4 MG
36800045660	Nicotine Polacrilex Gum 2 MG
36800045678	Nicotine Polacrilex Gum 2 MG
36800053260	Nicotine Polacrilex Gum 4 MG
36800053278	Nicotine Polacrilex Gum 4 MG
36800053905	Nicotine Polacrilex Lozenge 4 MG
36800085478	Nicotine Polacrilex Gum 4 MG
36800087305	Nicotine Polacrilex Lozenge 4 MG
37205003612	Nicotine TD Patch 24HR 11 MG/24HR
37205003674	Nicotine TD Patch 24HR 11 MG/24HR
37205003712	Nicotine TD Patch 24HR 22 MG/24HR
37205003774	Nicotine TD Patch 24HR 22 MG/24HR
37205020323	Nicotine Polacrilex Gum 2 MG
37205020346	Nicotine Polacrilex Gum 2 MG
37205020367	Nicotine Polacrilex Gum 2 MG
37205020371	Nicotine Polacrilex Gum 2 MG
37205020377	Nicotine Polacrilex Gum 2 MG
37205020423	Nicotine Polacrilex Gum 4 MG
37205020446	Nicotine Polacrilex Gum 4 MG
37205020467	Nicotine Polacrilex Gum 4 MG
37205020471	Nicotine Polacrilex Gum 4 MG
37205020477	Nicotine Polacrilex Gum 4 MG
37205035874	Nicotine TD Patch 24HR 21 MG/24HR
37205036174	Nicotine TD Patch 24HR 14 MG/24HR
37205036374	Nicotine TD Patch 24HR 7 MG/24HR
37205065678	Nicotine Polacrilex Gum 2 MG
37205065778	Nicotine Polacrilex Gum 4 MG
37205096758	Nicotine Polacrilex Gum 2 MG
37205096778	Nicotine Polacrilex Gum 2 MG
37205096858	Nicotine Polacrilex Gum 4 MG
37205096878	Nicotine Polacrilex Gum 4 MG
37205098769	Nicotine Polacrilex Lozenge 2 MG
37205098869	Nicotine Polacrilex Lozenge 4 MG
40986002981	Nicotine Polacrilex Gum 2 MG
40986002982	Nicotine Polacrilex Gum 4 MG
40986002983	Nicotine Polacrilex Gum 2 MG
40986002984	Nicotine Polacrilex Gum 4 MG
40986002985	Nicotine Polacrilex Gum 2 MG
40986002986	Nicotine Polacrilex Gum 4 MG
40986002987	Nicotine Polacrilex Gum 2 MG
40986002988	Nicotine Polacrilex Gum 4 MG
40986002989	Nicotine TD Patch 24HR 21 MG/24HR
40986002990	Nicotine TD Patch 24HR 14 MG/24HR
40986002991	Nicotine TD Patch 24HR 7 MG/24HR
40986003109	Nicotine Polacrilex Gum 2 MG
40986003110	Nicotine Polacrilex Gum 4 MG
41163002925	Nicotine Polacrilex Gum 2 MG
41163002996	Nicotine Polacrilex Gum 2 MG
41163017025	Nicotine Polacrilex Gum 4 MG
41163017096	Nicotine Polacrilex Gum 4 MG
41163020625	Nicotine Polacrilex Gum 2 MG
41163021630	Nicotine TD Patch 24HR 21 MG/24HR
41163021632	Nicotine TD Patch 24HR 21 MG/24HR
41163021636	Nicotine TD Patch 24HR 14 MG/24HR
41163021640	Nicotine TD Patch 24HR 7 MG/24HR
41163034405	Nicotine Polacrilex Lozenge 2 MG
41163034423	Nicotine Polacrilex Lozenge 2 MG
41163035278	Nicotine Polacrilex Gum 2 MG
41163042225	Nicotine Polacrilex Gum 4 MG
41163045678	Nicotine Polacrilex Gum 2 MG
41163053278	Nicotine Polacrilex Gum 4 MG
41163060050	Nicotine Polacrilex Gum 2 MG
41163060062	Nicotine Polacrilex Gum 2 MG
41163060098	Nicotine Polacrilex Gum 2 MG
41163060150	Nicotine Polacrilex Gum 4 MG
41163060162	Nicotine Polacrilex Gum 4 MG
41163060198	Nicotine Polacrilex Gum 4 MG
41163085478	Nicotine Polacrilex Gum 4 MG
41163087305	Nicotine Polacrilex Lozenge 4 MG
41163087323	Nicotine Polacrilex Lozenge 4 MG
41250002925	Nicotine Polacrilex Gum 2 MG
41250002996	Nicotine Polacrilex Gum 2 MG
41250017025	Nicotine Polacrilex Gum 4 MG
41250017096	Nicotine Polacrilex Gum 4 MG
41250019005	Nicotine Polacrilex Lozenge 4 MG
41250020105	Nicotine Polacrilex Lozenge 2 MG
41250020625	Nicotine Polacrilex Gum 2 MG
41250020629	Nicotine Polacrilex Gum 2 MG
41250020696	Nicotine Polacrilex Gum 2 MG
41250034405	Nicotine Polacrilex Lozenge 2 MG
41250034410	Nicotine Polacrilex Lozenge 2 MG
41250036578	Nicotine Polacrilex Gum 2 MG
41250042229	Nicotine Polacrilex Gum 4 MG
41250042296	Nicotine Polacrilex Gum 4 MG
41250042405	Nicotine Polacrilex Lozenge 4 MG
41250044278	Nicotine Polacrilex Gum 4 MG
41250045606	Nicotine Polacrilex Gum 2 MG
41250045670	Nicotine Polacrilex Gum 2 MG
41250045678	Nicotine Polacrilex Gum 2 MG
41250053206	Nicotine Polacrilex Gum 4 MG
41250053270	Nicotine Polacrilex Gum 4 MG
41250053278	Nicotine Polacrilex Gum 4 MG
41250070005	Nicotine Polacrilex Lozenge 2 MG
41250073402	Nicotine Polacrilex Lozenge 2 MG
41250085478	Nicotine Polacrilex Gum 4 MG
41250087305	Nicotine Polacrilex Lozenge 4 MG
41250087310	Nicotine Polacrilex Lozenge 4 MG
41250087311	Nicotine Polacrilex Lozenge 4 MG
41250095702	Nicotine Polacrilex Lozenge 4 MG
41415024473	Nicotine Polacrilex Gum 2 MG
41415024673	Nicotine Polacrilex Gum 4 MG
41415024773	Nicotine Polacrilex Gum 2 MG
41415024973	Nicotine Polacrilex Gum 4 MG
41415025873	Nicotine Polacrilex Lozenge 2 MG
41415025973	Nicotine Polacrilex Lozenge 4 MG
41520020671	Nicotine Polacrilex Gum 2 MG
41520031427	Nicotine Polacrilex Gum 4 MG
41520031452	Nicotine Polacrilex Lozenge 4 MG
41520031459	Nicotine Polacrilex Lozenge 2 MG
41520031475	Nicotine TD Patch 24HR 21 MG/24HR
41520031476	Nicotine TD Patch 24HR 14 MG/24HR
41520031477	Nicotine TD Patch 24HR 7 MG/24HR
41520031722	Nicotine Polacrilex Gum 2 MG
41520031723	Nicotine Polacrilex Gum 2 MG
41520031724	Nicotine Polacrilex Gum 4 MG
41520031725	Nicotine Polacrilex Gum 4 MG
41520031879	Nicotine Polacrilex Gum 2 MG
41520031880	Nicotine Polacrilex Gum 4 MG
41520035278	Nicotine Polacrilex Gum 2 MG
41520042271	Nicotine Polacrilex Gum 4 MG
41520045658	Nicotine Polacrilex Gum 2 MG
41520045678	Nicotine Polacrilex Gum 2 MG
41520053258	Nicotine Polacrilex Gum 4 MG
41520053278	Nicotine Polacrilex Gum 4 MG
41520085478	Nicotine Polacrilex Gum 4 MG
41520087305	Nicotine Polacrilex Lozenge 4 MG
43353089905	Varenicline Tartrate Tab 1 MG (Base Equiv)
43598044556	Nicotine TD Patch 24 HR Kit 21-14-7 MG/24HR
43598044670	Nicotine TD Patch 24HR 7 MG/24HR
43598044674	Nicotine TD Patch 24HR 7 MG/24HR
43598044770	Nicotine TD Patch 24HR 14 MG/24HR
43598044774	Nicotine TD Patch 24HR 14 MG/24HR
43598044828	Nicotine TD Patch 24HR 21 MG/24HR
43598044870	Nicotine TD Patch 24HR 21 MG/24HR
43598044874	Nicotine TD Patch 24HR 21 MG/24HR
45802000125	Nicotine Polacrilex Gum 4 MG
45802011078	Nicotine Polacrilex Gum 4 MG
45802020625	Nicotine Polacrilex Gum 2 MG
45802034405	Nicotine Polacrilex Lozenge 2 MG
45802087305	Nicotine Polacrilex Lozenge 4 MG
46122017125	Nicotine Polacrilex Gum 2 MG
46122017320	Nicotine Polacrilex Gum 2 MG
46122017608	Nicotine Polacrilex Lozenge 2 MG
46122017708	Nicotine Polacrilex Lozenge 4 MG
46122025415	Nicotine Polacrilex Lozenge 2 MG
46122025416	Nicotine Polacrilex Lozenge 2 MG
46122025515	Nicotine Polacrilex Lozenge 4 MG
46122028660	Nicotine Polacrilex Gum 4 MG
49035002996	Nicotine Polacrilex Gum 2 MG
49035012409	Nicotine Polacrilex Lozenge 2 MG
49035012410	Nicotine Polacrilex Lozenge 2 MG
49035017096	Nicotine Polacrilex Gum 4 MG
49035019009	Nicotine Polacrilex Lozenge 4 MG
49035019010	Nicotine Polacrilex Lozenge 4 MG
49035019401	Nicotine TD Patch 24HR 21 MG/24HR
49035019402	Nicotine TD Patch 24HR 21 MG/24HR
49035019502	Nicotine TD Patch 24HR 14 MG/24HR
49035019602	Nicotine TD Patch 24HR 7 MG/24HR
49035020696	Nicotine Polacrilex Gum 2 MG
49035034403	Nicotine Polacrilex Lozenge 2 MG
49035035278	Nicotine Polacrilex Gum 2 MG
49035036578	Nicotine Polacrilex Gum 2 MG
49035042098	Nicotine Polacrilex Gum 2 MG
49035042198	Nicotine Polacrilex Gum 4 MG
49035042296	Nicotine Polacrilex Gum 4 MG
49035044278	Nicotine Polacrilex Gum 4 MG
49035045606	Nicotine Polacrilex Gum 2 MG
49035045660	Nicotine Polacrilex Gum 2 MG
49035045678	Nicotine Polacrilex Gum 2 MG
49035053206	Nicotine Polacrilex Gum 4 MG
49035053260	Nicotine Polacrilex Gum 4 MG
49035053278	Nicotine Polacrilex Gum 4 MG
49035060050	Nicotine Polacrilex Gum 2 MG
49035060062	Nicotine Polacrilex Gum 2 MG
49035060098	Nicotine Polacrilex Gum 2 MG
49035060150	Nicotine Polacrilex Gum 4 MG
49035060162	Nicotine Polacrilex Gum 4 MG
49035060198	Nicotine Polacrilex Gum 4 MG
49035079602	Nicotine TD Patch 24HR 7 MG/24HR
49035082014	Nicotine TD Patch 24HR 7 MG/24HR
49035083007	Nicotine TD Patch 24HR 14 MG/24HR
49035083014	Nicotine TD Patch 24HR 14 MG/24HR
49035084007	Nicotine TD Patch 24HR 21 MG/24HR
49035084014	Nicotine TD Patch 24HR 21 MG/24HR
49035085478	Nicotine Polacrilex Gum 4 MG
49035087303	Nicotine Polacrilex Lozenge 4 MG
49035087309	Nicotine Polacrilex Lozenge 4 MG
49035087310	Nicotine Polacrilex Lozenge 4 MG
49035099809	Nicotine Polacrilex Lozenge 2 MG
49035099810	Nicotine Polacrilex Lozenge 2 MG
49348014446	Nicotine TD Patch 24HR 21 MG/24HR
49348014546	Nicotine TD Patch 24HR 14 MG/24HR
49348014646	Nicotine TD Patch 24HR 7 MG/24HR
49348033961	Nicotine TD Patch 24HR 11 MG/24HR
49348034046	Nicotine TD Patch 24HR 11 MG/24HR
49348034161	Nicotine TD Patch 24HR 22 MG/24HR
49348034246	Nicotine TD Patch 24HR 22 MG/24HR
49348057208	Nicotine Polacrilex Gum 4 MG
49348057236	Nicotine Polacrilex Gum 4 MG
49348057308	Nicotine Polacrilex Gum 2 MG
49348057336	Nicotine Polacrilex Gum 2 MG
49348069109	Nicotine Polacrilex Gum 2 MG
49348069136	Nicotine Polacrilex Gum 2 MG
49348069164	Nicotine Polacrilex Gum 2 MG
49348069209	Nicotine Polacrilex Gum 4 MG
49348069236	Nicotine Polacrilex Gum 4 MG
49348069264	Nicotine Polacrilex Gum 4 MG
49348078710	Nicotine Polacrilex Gum 2 MG
49348078759	Nicotine Polacrilex Gum 2 MG
49348078810	Nicotine Polacrilex Gum 4 MG
49348078859	Nicotine Polacrilex Gum 4 MG
49348085216	Nicotine Polacrilex Lozenge 2 MG
49348085316	Nicotine Polacrilex Lozenge 4 MG
49781014214	Nicotine TD Patch 24HR 21 MG/24HR
49781014314	Nicotine TD Patch 24HR 7 MG/24HR
49781014414	Nicotine TD Patch 24HR 14 MG/24HR
50428000773	Nicotine TD Patch 24HR 21 MG/24HR
50428000774	Nicotine TD Patch 24HR 21 MG/24HR
50428000775	Nicotine TD Patch 24HR 7 MG/24HR
50428000776	Nicotine TD Patch 24HR 14 MG/24HR
50428003053	Nicotine TD Patch 24HR 14 MG/24HR
50428016528	Nicotine Polacrilex Lozenge 2 MG
50428027709	Nicotine Polacrilex Lozenge 2 MG
50428040647	Nicotine Polacrilex Lozenge 4 MG
50428101972	Nicotine Polacrilex Gum 4 MG
50428102053	Nicotine Polacrilex Gum 2 MG
50428102194	Nicotine Polacrilex Gum 4 MG
50428102202	Nicotine Polacrilex Gum 2 MG
50428133177	Nicotine TD Patch 24HR 21 MG/24HR
50428133190	Nicotine TD Patch 24HR 21 MG/24HR
50428133246	Nicotine TD Patch 24HR 7 MG/24HR
50428133267	Nicotine TD Patch 24HR 14 MG/24HR
50428173013	Nicotine TD Patch 24HR 14 MG/24HR
50428246105	Nicotine Polacrilex Gum 4 MG
50428246106	Nicotine Polacrilex Gum 2 MG
50428253566	Nicotine Polacrilex Gum 2 MG
50428253568	Nicotine Polacrilex Gum 4 MG
50428331727	Nicotine Polacrilex Lozenge 4 MG
50428331733	Nicotine Polacrilex Lozenge 2 MG
50428331735	Nicotine Polacrilex Lozenge 4 MG
50428331740	Nicotine Polacrilex Lozenge 2 MG
50428331745	Nicotine Polacrilex Gum 4 MG
50428331752	Nicotine Polacrilex Gum 2 MG
50428338618	Nicotine TD Patch 24HR 7 MG/24HR
50428346565	Nicotine Polacrilex Lozenge 4 MG
50428348677	Nicotine Polacrilex Gum 4 MG
50428348681	Nicotine Polacrilex Gum 2 MG
50428394372	Nicotine Polacrilex Gum 2 MG
50428394373	Nicotine Polacrilex Gum 2 MG
50428394374	Nicotine Polacrilex Gum 4 MG
50428394375	Nicotine Polacrilex Gum 4 MG
50428396725	Nicotine Polacrilex Gum 2 MG
50428396726	Nicotine Polacrilex Gum 4 MG
50428396728	Nicotine Polacrilex Gum 2 MG
50428396729	Nicotine Polacrilex Gum 4 MG
50428416296	Nicotine Polacrilex Lozenge 4 MG
50428446877	Nicotine Polacrilex Gum 4 MG
50428446881	Nicotine Polacrilex Gum 2 MG
50428456109	Nicotine Polacrilex Lozenge 4 MG
50428456112	Nicotine Polacrilex Lozenge 2 MG
50428456113	Nicotine Polacrilex Gum 4 MG
50428456116	Nicotine Polacrilex Gum 2 MG
50428473604	Nicotine TD Patch 24HR 14 MG/24HR
50428717943	Nicotine Polacrilex Lozenge 4 MG
50428718184	Nicotine Polacrilex Gum 4 MG
50428718193	Nicotine Polacrilex Gum 4 MG
50428718195	Nicotine Polacrilex Gum 2 MG
50428718198	Nicotine Polacrilex Gum 2 MG
50428720014	Nicotine Polacrilex Gum 2 MG
50428720035	Nicotine Polacrilex Gum 4 MG
52735094052	Nicotine TD Patch 24HR 21 MG/24HR
52735094173	Nicotine TD Patch 24HR 14 MG/24HR
52735094273	Nicotine TD Patch 24HR 7 MG/24HR
52735094373	Nicotine TD Patch 24HR 21 MG/24HR
52959048730	Bupropion HCl (Smoking Deterrent) Tab SR 12HR 150 MG
52959095156	Varenicline Tartrate Tab 1 MG (Base Equiv)
54569438900	Nicotine TD Patch 24HR 21 MG/24HR
54569438901	Nicotine TD Patch 24HR 21 MG/24HR
54569448000	Nicotine TD Patch 24HR 7 MG/24HR
54569448100	Nicotine TD Patch 24HR 14 MG/24HR
54569449600	Bupropion HCl (Smoking Deterrent) Tab SR 12HR 150 MG
54569457100	Nicotine Inhaler System 10 MG (4 MG Delivered)
54569483300	Nicotine Polacrilex Gum 2 MG
54569483400	Nicotine Polacrilex Gum 2 MG
54569483500	Nicotine TD Patch 24HR 14 MG/24HR
54569483501	Nicotine TD Patch 24HR 14 MG/24HR
54569565800	Nicotine TD Patch 24HR 7 MG/24HR
54569570000	Nicotine Polacrilex Gum 2 MG
54569583000	Varenicline Tartrate Tab 1 MG (Base Equiv)
54569583200	Varenicline Tartrate Tab 0.5 MG X 11 & Tab 1 MG X 42 Pack
54569615000	Nicotine Polacrilex Gum 4 MG
54569615100	Nicotine Polacrilex Gum 2 MG
54569615200	Nicotine Inhaler System 10 MG (4 MG Delivered)
54569615300	Nicotine Nasal Spray 10 MG/ML (0.5 MG/SPRAY)
54569615400	Nicotine TD Patch 24HR 7 MG/24HR
54569615500	Nicotine TD Patch 24HR 14 MG/24HR
54569615600	Nicotine TD Patch 24HR 21 MG/24HR
54569615700	Nicotine Polacrilex Lozenge 4 MG
54569615800	Nicotine Polacrilex Lozenge 2 MG
54569616000	Bupropion HCl (Smoking Deterrent) Tab SR 12HR 150 MG
54569616001	Bupropion HCl (Smoking Deterrent) Tab SR 12HR 150 MG
54569616100	Nicotine Polacrilex Gum 4 MG
54569616200	Nicotine Polacrilex Lozenge 2 MG
54569616300	Nicotine Polacrilex Lozenge 4 MG
54569640500	Nicotine Polacrilex Gum 2 MG
54868201101	Nicotine TD Patch 24HR 21 MG/24HR
54868201201	Nicotine TD Patch 24HR 14 MG/24HR
54868353800	Nicotine Polacrilex Gum 4 MG
54868402500	Bupropion HCl (Smoking Deterrent) Tab SR 12HR 150 MG
54868497800	Nicotine TD Patch 24HR 7 MG/24HR
54868505200	Nicotine Inhaler System 10 MG (4 MG Delivered)
54868566400	Varenicline Tartrate Tab 0.5 MG X 11 & Tab 1 MG X 42 Pack
54868567400	Varenicline Tartrate Tab 1 MG (Base Equiv)
54868581900	Nicotine TD Patch 24HR 7 MG/24HR
54868582000	Nicotine TD Patch 24HR 14 MG/24HR
54868582100	Nicotine TD Patch 24HR 21 MG/24HR
55887009653	Varenicline Tartrate Tab 0.5 MG X 11 & Tab 1 MG X 42 Pack
58118999205	Varenicline Tartrate Tab 0.5 MG X 11 & Tab 1 MG X 42 Pack
59779034423	Nicotine Polacrilex Lozenge 2 MG
59779037708	Nicotine Polacrilex Lozenge 2 MG
59779042098	Nicotine Polacrilex Gum 2 MG
59779042296	Nicotine Polacrilex Gum 4 MG
59779045658	Nicotine Polacrilex Gum 2 MG
59779045678	Nicotine Polacrilex Gum 2 MG
59779053258	Nicotine Polacrilex Gum 4 MG
59779053278	Nicotine Polacrilex Gum 4 MG
59779087308	Nicotine Polacrilex Lozenge 4 MG
59779087323	Nicotine Polacrilex Lozenge 4 MG
60429044314	Nicotine TD Patch 24HR 7 MG/24HR
60429044414	Nicotine TD Patch 24HR 14 MG/24HR
60429044514	Nicotine TD Patch 24HR 21 MG/24HR
61955060043	Nicotine Polacrilex Gum 2 MG
61955060062	Nicotine Polacrilex Gum 2 MG
61955060143	Nicotine Polacrilex Gum 4 MG
61955060162	Nicotine Polacrilex Gum 4 MG
62011004702	Nicotine Polacrilex Gum 2 MG
62011004801	Nicotine Polacrilex Lozenge 2 MG
62011004803	Nicotine Polacrilex Lozenge 2 MG
62011005001	Nicotine TD Patch 24HR 7 MG/24HR
62011017001	Nicotine Polacrilex Gum 4 MG
62011017101	Nicotine Polacrilex Lozenge 4 MG
62011017102	Nicotine Polacrilex Lozenge 4 MG
62011017201	Nicotine TD Patch 24HR 14 MG/24HR
62011017301	Nicotine TD Patch 24HR 21 MG/24HR
62011019901	Nicotine Polacrilex Lozenge 2 MG
62011020001	Nicotine Polacrilex Lozenge 4 MG
63868019511	Nicotine Polacrilex Gum 4 MG
63981002901	Nicotine Polacrilex Gum 2 MG
63981017001	Nicotine Polacrilex Gum 4 MG
63981034437	Nicotine Polacrilex Lozenge 2 MG
63981087337	Nicotine Polacrilex Lozenge 4 MG
65084041413	Bupropion HCl (Smoking Deterrent) Tab SR 12HR 150 MG
65084041442	Bupropion HCl (Smoking Deterrent) Tab SR 12HR 150 MG
67767011760	Bupropion HCl (Smoking Deterrent) Tab SR 12HR 150 MG
68115064914	Nicotine TD Patch 24HR 14 MG/24HR
68258706204	Nicotine TD Patch 24HR 21 MG/24HR
68258706304	Nicotine TD Patch 24HR 14 MG/24HR
68258706404	Nicotine TD Patch 24HR 7 MG/24HR
68258706505	Varenicline Tartrate Tab 0.5 MG X 11 & Tab 1 MG X 42 Pack
68258706606	Varenicline Tartrate Tab 1 MG (Base Equiv)
68258799305	Nicotine Polacrilex Gum 2 MG
68258799405	Nicotine Polacrilex Gum 4 MG
68258799701	Nicotine TD Patch 24HR 7 MG/24HR
68258799801	Nicotine TD Patch 24HR 14 MG/24HR
68258799901	Nicotine TD Patch 24HR 21 MG/24HR
71114060042	Nicotine Polacrilex Gum 2 MG
71114060043	Nicotine Polacrilex Gum 2 MG
71114060142	Nicotine Polacrilex Gum 4 MG
71114060143	Nicotine Polacrilex Gum 4 MG
78742000613	Nicotine Polacrilex Gum 2 MG
78742009146	Nicotine Polacrilex Lozenge 4 MG
87701040016	Nicotine Polacrilex Gum 2 MG
87701040017	Nicotine Polacrilex Gum 2 MG
87701040018	Nicotine Polacrilex Gum 4 MG
87701040019	Nicotine Polacrilex Gum 4 MG
87701040252	Nicotine Polacrilex Gum 2 MG
87701040253	Nicotine Polacrilex Gum 4 MG
87701040382	Nicotine Polacrilex Lozenge 2 MG
87701040383	Nicotine Polacrilex Lozenge 4 MG
87701089455	Nicotine TD Patch 24HR 11 MG/24HR
87701089458	Nicotine TD Patch 24HR 11 MG/24HR
87701089459	Nicotine TD Patch 24HR 22 MG/24HR
87701089466	Nicotine TD Patch 24HR 22 MG/24HR
87701089467	Nicotine TD Patch 24HR 11 MG/24HR
87701089468	Nicotine TD Patch 24HR 11 MG/24HR
87701089469	Nicotine TD Patch 24HR 22 MG/24HR
87701089471	Nicotine TD Patch 24HR 22 MG/24HR
91899044074	Nicotine TD Patch 24HR 7 MG/24HR
91899068410	Nicotine TD Patch 24HR 21 MG/24HR
91899068474	Nicotine TD Patch 24HR 14 MG/24HR

## Sheet: Diabetes
Diabetes
An individual was considered to have diabetes if he/she had a diabetes ICD-9-CM diagnosis code on:
-- ≥1 inpatient facility claim, or
-- ≥2 non-inpatient facility medical claims for ≥2 service dates, excluding transportation and laboratory claims, or
Or if he/she had ≥1 pharmacy claim for a diabetes-specific medication based on National Drug Codes (NDC)
Diabetes ICD-9-CM Codes
250.00	DIABETES MELLITUS WITHOUT MENTION OF COMPLICATION, TYPE II OR UNSPECIFIED TYPE, NOT STATED AS UNCONTROLLED
250.01	DIABETES MELLITUS WITHOUT MENTION OF COMPLICATION, TYPE I [JUVENILE TYPE], NOT STATED AS UNCONTROLLED
250.02	DIABETES MELLITUS WITHOUT MENTION OF COMPLICATION, TYPE II OR UNSPECIFIED TYPE, UNCONTROLLED
250.03	DIABETES MELLITUS WITHOUT MENTION OF COMPLICATION, TYPE I [JUVENILE TYPE], UNCONTROLLED
250.10	DIABETES WITH KETOACIDOSIS, TYPE II OR UNSPECIFIED TYPE, NOT STATED AS UNCONTROLLED
250.11	DIABETES WITH KETOACIDOSIS, TYPE I [JUVENILE TYPE], NOT STATED AS UNCONTROLLED
250.12	DIABETES WITH KETOACIDOSIS, TYPE II OR UNSPECIFIED TYPE, UNCONTROLLED
250.13	DIABETES WITH KETOACIDOSIS, TYPE I [JUVENILE TYPE], UNCONTROLLED
250.20	DIABETES WITH HYPEROSMOLARITY, TYPE II OR UNSPECIFIED TYPE, NOT STATED AS UNCONTROLLED
250.21	DIABETES WITH HYPEROSMOLARITY, TYPE I [JUVENILE TYPE], NOT STATED AS UNCONTROLLED
250.22	DIABETES WITH HYPEROSMOLARITY, TYPE II OR UNSPECIFIED TYPE, UNCONTROLLED
250.23	DIABETES WITH HYPEROSMOLARITY, TYPE I [JUVENILE TYPE], UNCONTROLLED
250.30	DIABETES WITH OTHER COMA, TYPE II OR UNSPECIFIED TYPE, NOT STATED AS UNCONTROLLED
250.31	DIABETES WITH OTHER COMA, TYPE I [JUVENILE TYPE], NOT STATED AS UNCONTROLLED
250.32	DIABETES WITH OTHER COMA, TYPE II OR UNSPECIFIED TYPE, UNCONTROLLED
250.33	DIABETES WITH OTHER COMA, TYPE I [JUVENILE TYPE], UNCONTROLLED
250.40	DIABETES WITH RENAL MANIFESTATIONS, TYPE II OR UNSPECIFIED TYPE, NOT STATED AS UNCONTROLLED
250.41	DIABETES WITH RENAL MANIFESTATIONS, TYPE I [JUVENILE TYPE], NOT STATED AS UNCONTROLLED
250.42	DIABETES WITH RENAL MANIFESTATIONS, TYPE II OR UNSPECIFIED TYPE, UNCONTROLLED
250.43	DIABETES WITH RENAL MANIFESTATIONS, TYPE I [JUVENILE TYPE], UNCONTROLLED
250.50	DIABETES WITH OPHTHALMIC MANIFESTATIONS, TYPE II OR UNSPECIFIED TYPE, NOT STATED AS UNCONTROLLED
250.51	DIABETES WITH OPHTHALMIC MANIFESTATIONS, TYPE I [JUVENILE TYPE], NOT STATED AS UNCONTROLLED
250.52	DIABETES WITH OPHTHALMIC MANIFESTATIONS, TYPE II OR UNSPECIFIED TYPE, UNCONTROLLED
250.53	DIABETES WITH OPHTHALMIC MANIFESTATIONS, TYPE I [JUVENILE TYPE], UNCONTROLLED
250.60	DIABETES WITH NEUROLOGICAL MANIFESTATIONS, TYPE II OR UNSPECIFIED TYPE, NOT STATED AS UNCONTROLLED
250.61	DIABETES WITH NEUROLOGICAL MANIFESTATIONS, TYPE I [JUVENILE TYPE], NOT STATED AS UNCONTROLLED
250.62	DIABETES WITH NEUROLOGICAL MANIFESTATIONS, TYPE II OR UNSPECIFIED TYPE, UNCONTROLLED
250.63	DIABETES WITH NEUROLOGICAL MANIFESTATIONS, TYPE I [JUVENILE TYPE], UNCONTROLLED
250.70	DIABETES WITH PERIPHERAL CIRCULATORY DISORDERS, TYPE II OR UNSPECIFIED TYPE, NOT STATED AS UNCONTROLLED
250.71	DIABETES WITH PERIPHERAL CIRCULATORY DISORDERS, TYPE I [JUVENILE TYPE], NOT STATED AS UNCONTROLLED
250.72	DIABETES WITH PERIPHERAL CIRCULATORY DISORDERS, TYPE II OR UNSPECIFIED TYPE, UNCONTROLLED
250.73	DIABETES WITH PERIPHERAL CIRCULATORY DISORDERS, TYPE I [JUVENILE TYPE], UNCONTROLLED
250.80	DIABETES WITH OTHER SPECIFIED MANIFESTATIONS, TYPE II OR UNSPECIFIED TYPE, NOT STATED AS UNCONTROLLED
250.81	DIABETES WITH OTHER SPECIFIED MANIFESTATIONS, TYPE I [JUVENILE TYPE], NOT STATED AS UNCONTROLLED
250.82	DIABETES WITH OTHER SPECIFIED MANIFESTATIONS, TYPE II OR UNSPECIFIED TYPE, UNCONTROLLED
250.83	DIABETES WITH OTHER SPECIFIED MANIFESTATIONS, TYPE I [JUVENILE TYPE], UNCONTROLLED
250.90	DIABETES WITH UNSPECIFIED COMPLICATION, TYPE II OR UNSPECIFIED TYPE, NOT STATED AS UNCONTROLLED
250.91	DIABETES WITH UNSPECIFIED COMPLICATION, TYPE I [JUVENILE TYPE], NOT STATED AS UNCONTROLLED
250.92	DIABETES WITH UNSPECIFIED COMPLICATION, TYPE II OR UNSPECIFIED TYPE, UNCONTROLLED
250.93	DIABETES WITH UNSPECIFIED COMPLICATION, TYPE I [JUVENILE TYPE], UNCONTROLLED
357.2	POLYNEUROPATHY IN DIABETES
362.01	BACKGROUND DIABETIC RETINOPATHY
362.02	PROLIFERATIVE DIABETIC RETINOPATHY
362.03	NONPROLIFERATIVE DIABETIC RETINOPATHY NOS
362.04	MILD NONPROLIFERATIVE DIABETIC RETINOPATHY
362.05	MODERATE NONPROLIFERATIVE DIABETIC RETINOPATHY
362.06	SEVERE NONPROLIFERATIVE DIABETIC RETINOPATHY
362.07	DIABETIC MACULAR EDEMA
366.41	DIABETIC CATARACT
250.*	ANY DIABETES
Diabetes Medication NDC Codes
00002143301	Dulaglutide Soln Pen-injector 0.75 MG/0.5ML
00002143380	Dulaglutide Soln Pen-injector 0.75 MG/0.5ML
00002143401	Dulaglutide Soln Pen-injector 1.5 MG/0.5ML
00002143480	Dulaglutide Soln Pen-injector 1.5 MG/0.5ML
00002751001	Insulin Lispro (Human) Inj 100 Unit/ML
00002751017	Insulin Lispro (Human) Inj 100 Unit/ML
00002751101	Insulin Lispro Prot & Lispro (Human) Inj 100 Unit/ML (75-25)
00002751201	Insulin Lispro Prot & Lispro (Human) Inj 100 Unit/ML (50-50)
00002751501	Insulin Lispro (Human) Inj 100 Unit/ML
00002751559	Insulin Lispro (Human) Inj 100 Unit/ML
00002751601	Insulin Lispro (Human) Soln Cartridge 100 Unit/ML
00002751659	Insulin Lispro (Human) Soln Cartridge 100 Unit/ML
00002771201	Insulin Lispro (Human) Soln Pen-injector 200 Unit/ML
00002771227	Insulin Lispro (Human) Soln Pen-injector 200 Unit/ML
00002821001	Insulin (Regular) Inj 100 Unit/ML
00002821101	Insulin Regular (Pork) Inj 100 Unit/ML
00002821501	Insulin Regular (Human) Inj 100 Unit/ML
00002821517	Insulin Regular (Human) Inj 100 Unit/ML
00002821591	Insulin Regular (Human) Inj 100 Unit/ML
00002831001	Insulin Isophane Inj 100 Unit/ML
00002831101	Insulin Isophane (Pork) Inj 100 Unit/ML
00002831501	Insulin NPH (Human) (Isophane) Inj 100 Unit/ML
00002831517	Insulin NPH (Human) (Isophane) Inj 100 Unit/ML
00002831591	Insulin NPH (Human) (Isophane) Inj 100 Unit/ML
00002841001	Insulin Zinc Inj 100 Unit/ML
00002841101	Insulin Zinc (Pork) Inj 100 Unit/ML
00002841501	Insulin Zinc (Human) Inj 100 Unit/ML
00002850101	Insulin Regular (Human) Inj 500 Unit/ML
00002861501	Insulin Zinc, Extended (Human) Inj 100 Unit/ML
00002871501	Insulin NPH Isophane & Regular Human Inj 100 Unit/ML (70-30)
00002871517	Insulin NPH Isophane & Regular Human Inj 100 Unit/ML (70-30)
00002871591	Insulin NPH Isophane & Regular Human Inj 100 Unit/ML (70-30)
00002872501	Insulin Lispro (Human) Soln Pen-injector 100 Unit/ML
00002872559	Insulin Lispro (Human) Soln Pen-injector 100 Unit/ML
00002873001	Insulin NPH (Human) (Isophane) Susp Pen-injector 100 Unit/ML
00002873059	Insulin NPH (Human) (Isophane) Susp Pen-injector 100 Unit/ML
00002877001	Insulin NPH & Regular Susp Pen-Inj 100 Unit/ML (70-30)
00002877059	Insulin NPH & Regular Susp Pen-Inj 100 Unit/ML (70-30)
00002879301	Insulin Lispro Prot & Lispro Sus Pen-inj 100 Unit/ML (50-50)
00002879359	Insulin Lispro Prot & Lispro Sus Pen-inj 100 Unit/ML (50-50)
00002879401	Insulin Lispro Prot & Lispro Sus Pen-inj 100 Unit/ML (75-25)
00002879459	Insulin Lispro Prot & Lispro Sus Pen-inj 100 Unit/ML (75-25)
00002879701	Insulin Lispro Prot & Lispro Sus Pen-inj 100 Unit/ML (75-25)
00002879759	Insulin Lispro Prot & Lispro Sus Pen-inj 100 Unit/ML (75-25)
00002879801	Insulin Lispro Prot & Lispro Sus Pen-inj 100 Unit/ML (50-50)
00002879859	Insulin Lispro Prot & Lispro Sus Pen-inj 100 Unit/ML (50-50)
00002879901	Insulin Lispro (Human) Soln Pen-injector 100 Unit/ML
00002879959	Insulin Lispro (Human) Soln Pen-injector 100 Unit/ML
00002880301	Insulin NPH & Regular Susp Pen-Inj 100 Unit/ML (70-30)
00002880359	Insulin NPH & Regular Susp Pen-Inj 100 Unit/ML (70-30)
00002880501	Insulin NPH (Human) (Isophane) Susp Pen-injector 100 Unit/ML
00002880559	Insulin NPH (Human) (Isophane) Susp Pen-injector 100 Unit/ML
00002882401	Insulin Regular (Human) Soln Pen-Injector 500 Unit/ML
00002882427	Insulin Regular (Human) Soln Pen-Injector 500 Unit/ML
00002951501	Insulin Isophane & Regular (Human) Inj 100 Unit/ML (50-50)
00003142711	Dapagliflozin Propanediol Tab 5 MG (Base Equivalent)
00003142811	Dapagliflozin Propanediol Tab 10 MG (Base Equivalent)
00003421411	Saxagliptin HCl Tab 2.5 MG (Base Equiv)
00003421421	Saxagliptin HCl Tab 2.5 MG (Base Equiv)
00003421511	Saxagliptin HCl Tab 5 MG (Base Equiv)
00003421521	Saxagliptin HCl Tab 5 MG (Base Equiv)
00003421531	Saxagliptin HCl Tab 5 MG (Base Equiv)
00003421541	Saxagliptin HCl Tab 5 MG (Base Equiv)
00003422111	Saxagliptin-Metformin HCl Tab SR 24HR 5-500 MG
00003422216	Saxagliptin-Metformin HCl Tab SR 24HR 2.5-1000 MG
00003422311	Saxagliptin-Metformin HCl Tab SR 24HR 5-1000 MG
00006007861	Sitagliptin-Metformin HCl Tab SR 24HR 50-500 MG
00006007862	Sitagliptin-Metformin HCl Tab SR 24HR 50-500 MG
00006007882	Sitagliptin-Metformin HCl Tab SR 24HR 50-500 MG
00006008061	Sitagliptin-Metformin HCl Tab SR 24HR 50-1000 MG
00006008062	Sitagliptin-Metformin HCl Tab SR 24HR 50-1000 MG
00006008082	Sitagliptin-Metformin HCl Tab SR 24HR 50-1000 MG
00006008131	Sitagliptin-Metformin HCl Tab SR 24HR 100-1000 MG
00006008154	Sitagliptin-Metformin HCl Tab SR 24HR 100-1000 MG
00006008182	Sitagliptin-Metformin HCl Tab SR 24HR 100-1000 MG
00006011228	Sitagliptin Phosphate Tab 50 MG (Base Equiv)
00006011231	Sitagliptin Phosphate Tab 50 MG (Base Equiv)
00006011254	Sitagliptin Phosphate Tab 50 MG (Base Equiv)
00006022128	Sitagliptin Phosphate Tab 25 MG (Base Equiv)
00006022131	Sitagliptin Phosphate Tab 25 MG (Base Equiv)
00006022154	Sitagliptin Phosphate Tab 25 MG (Base Equiv)
00006027702	Sitagliptin Phosphate Tab 100 MG (Base Equiv)
00006027728	Sitagliptin Phosphate Tab 100 MG (Base Equiv)
00006027731	Sitagliptin Phosphate Tab 100 MG (Base Equiv)
00006027733	Sitagliptin Phosphate Tab 100 MG (Base Equiv)
00006027754	Sitagliptin Phosphate Tab 100 MG (Base Equiv)
00006027782	Sitagliptin Phosphate Tab 100 MG (Base Equiv)
00006053331	Sitagliptin-Simvastatin Tab 50-10 MG
00006053354	Sitagliptin-Simvastatin Tab 50-10 MG
00006053531	Sitagliptin-Simvastatin Tab 50-20 MG
00006053554	Sitagliptin-Simvastatin Tab 50-20 MG
00006053731	Sitagliptin-Simvastatin Tab 50-40 MG
00006053754	Sitagliptin-Simvastatin Tab 50-40 MG
00006057552	Sitagliptin-Metformin HCl Tab 50-500 MG
00006057561	Sitagliptin-Metformin HCl Tab 50-500 MG
00006057562	Sitagliptin-Metformin HCl Tab 50-500 MG
00006057582	Sitagliptin-Metformin HCl Tab 50-500 MG
00006057752	Sitagliptin-Metformin HCl Tab 50-1000 MG
00006057761	Sitagliptin-Metformin HCl Tab 50-1000 MG
00006057762	Sitagliptin-Metformin HCl Tab 50-1000 MG
00006057782	Sitagliptin-Metformin HCl Tab 50-1000 MG
00006075331	Sitagliptin-Simvastatin Tab 100-10 MG
00006075354	Sitagliptin-Simvastatin Tab 100-10 MG
00006075382	Sitagliptin-Simvastatin Tab 100-10 MG
00006075731	Sitagliptin-Simvastatin Tab 100-20 MG
00006075754	Sitagliptin-Simvastatin Tab 100-20 MG
00006075782	Sitagliptin-Simvastatin Tab 100-20 MG
00006077331	Sitagliptin-Simvastatin Tab 100-40 MG
00006077354	Sitagliptin-Simvastatin Tab 100-40 MG
00006077382	Sitagliptin-Simvastatin Tab 100-40 MG
00007314813	Rosiglitazone Maleate-Glimepiride Tab 8-2 MG
00007314913	Rosiglitazone Maleate-Glimepiride Tab 8-4 MG
00007315113	Rosiglitazone Maleate-Glimepiride Tab 4-1 MG
00007315213	Rosiglitazone Maleate-Glimepiride Tab 4-2 MG
00007315313	Rosiglitazone Maleate-Glimepiride Tab 4-4 MG
00007316318	Rosiglitazone Maleate-Metformin HCl Tab 2-1000 MG
00007316418	Rosiglitazone Maleate-Metformin HCl Tab 4-1000 MG
00007316618	Rosiglitazone Maleate-Metformin HCl Tab 1-500 MG
00007316620	Rosiglitazone Maleate-Metformin HCl Tab 1-500 MG
00007316718	Rosiglitazone Maleate-Metformin HCl Tab 2-500 MG
00007316720	Rosiglitazone Maleate-Metformin HCl Tab 2-500 MG
00007316818	Rosiglitazone Maleate-Metformin HCl Tab 4-500 MG
00007316820	Rosiglitazone Maleate-Metformin HCl Tab 4-500 MG
00009007002	Tolazamide Tab 100 MG
00009011404	Tolazamide Tab 250 MG
00009011405	Tolazamide Tab 250 MG
00009013101	Glyburide Tab 1.25 MG
00009014101	Glyburide Tab 2.5 MG
00009014102	Glyburide Tab 2.5 MG
00009017103	Glyburide Tab 5 MG
00009017105	Glyburide Tab 5 MG
00009017106	Glyburide Tab 5 MG
00009017107	Glyburide Tab 5 MG
00009017111	Glyburide Tab 5 MG
00009017112	Glyburide Tab 5 MG
00009034101	Glyburide Micronized Tab 1.5 MG
00009034102	Glyburide Micronized Tab 1.5 MG
00009035201	Glyburide Micronized Tab 3 MG
00009035202	Glyburide Micronized Tab 3 MG
00009035203	Glyburide Micronized Tab 3 MG
00009035204	Glyburide Micronized Tab 3 MG
00009344901	Glyburide Micronized Tab 6 MG
00009344903	Glyburide Micronized Tab 6 MG
00009501201	Miglitol Tab 25 MG
00009501301	Miglitol Tab 50 MG
00009501401	Miglitol Tab 100 MG
00024586903	Insulin Glargine Soln Pen-Injector 300 Unit/ML
00024587490	Insulin Regular (Human) Inhalation Powder 4 Unit/Cartridge
00024588236	Insulin Regular (Human) Inhal Powd 4 (30) & 8 (60) Unit/Cart
00024588463	Insulin Regular (Human) Inhal Powd 4 (60) & 8 (30) Unit/Cart
00024589463	Insulin Regular (Human) Inh Powd 8 (60) & 12 (30) Unit/Cart
00026286148	Acarbose Tab 50 MG
00026286151	Acarbose Tab 50 MG
00026286251	Acarbose Tab 100 MG
00026286351	Acarbose Tab 25 MG
00029315113	Rosiglitazone Maleate-Glimepiride Tab 4-1 MG
00029315213	Rosiglitazone Maleate-Glimepiride Tab 4-2 MG
00029315313	Rosiglitazone Maleate-Glimepiride Tab 4-4 MG
00029315818	Rosiglitazone Maleate Tab 2 MG (Base Equiv)
00029315900	Rosiglitazone Maleate Tab 4 MG (Base Equiv)
00029315913	Rosiglitazone Maleate Tab 4 MG (Base Equiv)
00029315918	Rosiglitazone Maleate Tab 4 MG (Base Equiv)
00029315920	Rosiglitazone Maleate Tab 4 MG (Base Equiv)
00029316013	Rosiglitazone Maleate Tab 8 MG (Base Equiv)
00029316020	Rosiglitazone Maleate Tab 8 MG (Base Equiv)
00029316059	Rosiglitazone Maleate Tab 8 MG (Base Equiv)
00039005110	Glyburide Tab 2.5 MG
00039005111	Glyburide Tab 2.5 MG
00039005150	Glyburide Tab 2.5 MG
00039005210	Glyburide Tab 5 MG
00039005211	Glyburide Tab 5 MG
00039005250	Glyburide Tab 5 MG
00039005270	Glyburide Tab 5 MG
00039005305	Glyburide Tab 1.25 MG
00039022110	Glimepiride Tab 1 MG
00039022210	Glimepiride Tab 2 MG
00039022211	Glimepiride Tab 2 MG
00039022310	Glimepiride Tab 4 MG
00039022311	Glimepiride Tab 4 MG
00049017001	Glipizide Tab SR 24HR 2.5 MG
00049017402	Glipizide Tab SR 24HR 5 MG
00049017403	Glipizide Tab SR 24HR 5 MG
00049017807	Glipizide Tab SR 24HR 10 MG
00049017808	Glipizide Tab SR 24HR 10 MG
00049155066	Glipizide Tab SR 24HR 5 MG
00049155073	Glipizide Tab SR 24HR 5 MG
00049156066	Glipizide Tab SR 24HR 10 MG
00049156073	Glipizide Tab SR 24HR 10 MG
00049162030	Glipizide Tab SR 24HR 2.5 MG
00049411066	Glipizide Tab 5 MG
00049411073	Glipizide Tab 5 MG
00049412066	Glipizide Tab 10 MG
00049412073	Glipizide Tab 10 MG
00054014025	Acarbose Tab 25 MG
00054014120	Acarbose Tab 50 MG
00054014125	Acarbose Tab 50 MG
00054014225	Acarbose Tab 100 MG
00069005019	Insulin Regular (Human) Inhalation Powder 1 & 3 MG/BLISTER
00069005053	Insulin Regular (Human) Inhalation Powder 1 & 3 MG/BLISTER
00069005085	Insulin Regular (Human) Inhalation Powder 1 & 3 MG/BLISTER
00069070737	Insulin Regular (Human) Inhalation Powder 1 MG/BLISTER
00069072437	Insulin Regular (Human) Inhalation Powder 3 MG/BLISTER
00069393066	Chlorpropamide Tab 100 MG
00069394066	Chlorpropamide Tab 250 MG
00069394082	Chlorpropamide Tab 250 MG
00078035105	Nateglinide Tab 60 MG
00078035205	Nateglinide Tab 120 MG
00087607211	Glyburide-Metformin Tab 1.25-250 MG
00087607311	Glyburide-Metformin Tab 2.5-500 MG
00087607411	Glyburide-Metformin Tab 5-500 MG
00087607731	Glipizide-Metformin HCl Tab 2.5-500 MG
00087607831	Glipizide-Metformin HCl Tab 5-500 MG
00087608131	Glipizide-Metformin HCl Tab 2.5-250 MG
00088221905	Insulin Glargine Soln Pen-Injector 100 Unit/ML
00088222033	Insulin Glargine Inj 100 Unit/ML
00088222052	Insulin Glargine Soln Cartridge 100 Unit/ML
00088222060	Insulin Glargine Soln Pen-Injector 100 Unit/ML
00088250033	Insulin Glulisine Inj 100 Unit/ML
00088250052	Insulin Glulisine Soln Cartridge Inj 100 Unit/ML
00088250205	Insulin Glulisine Soln Pen-Injector Inj 100 Unit/ML
00093204605	Pioglitazone HCl Tab 45 MG (Base Equiv)
00093204656	Pioglitazone HCl Tab 45 MG (Base Equiv)
00093204698	Pioglitazone HCl Tab 45 MG (Base Equiv)
00093204705	Pioglitazone HCl Tab 30 MG (Base Equiv)
00093204756	Pioglitazone HCl Tab 30 MG (Base Equiv)
00093204798	Pioglitazone HCl Tab 30 MG (Base Equiv)
00093204805	Pioglitazone HCl Tab 15 MG (Base Equiv)
00093204856	Pioglitazone HCl Tab 15 MG (Base Equiv)
00093204898	Pioglitazone HCl Tab 15 MG (Base Equiv)
00093504906	Pioglitazone HCl-Metformin HCl Tab 15-500 MG
00093504986	Pioglitazone HCl-Metformin HCl Tab 15-500 MG
00093505006	Pioglitazone HCl-Metformin HCl Tab 15-850 MG
00093505086	Pioglitazone HCl-Metformin HCl Tab 15-850 MG
00093571001	Glyburide-Metformin Tab 1.25-250 MG
00093571005	Glyburide-Metformin Tab 1.25-250 MG
00093571019	Glyburide-Metformin Tab 1.25-250 MG
00093571083	Glyburide-Metformin Tab 1.25-250 MG
00093571093	Glyburide-Metformin Tab 1.25-250 MG
00093571101	Glyburide-Metformin Tab 2.5-500 MG
00093571105	Glyburide-Metformin Tab 2.5-500 MG
00093571119	Glyburide-Metformin Tab 2.5-500 MG
00093571193	Glyburide-Metformin Tab 2.5-500 MG
00093571201	Glyburide-Metformin Tab 5-500 MG
00093571205	Glyburide-Metformin Tab 5-500 MG
00093571219	Glyburide-Metformin Tab 5-500 MG
00093571293	Glyburide-Metformin Tab 5-500 MG
00093725401	Glimepiride Tab 1 MG
00093725501	Glimepiride Tab 2 MG
00093725601	Glimepiride Tab 4 MG
00093725652	Glimepiride Tab 4 MG
00093726001	Glyburide-Metformin Tab 1.25-250 MG
00093726101	Glyburide-Metformin Tab 2.5-500 MG
00093726105	Glyburide-Metformin Tab 2.5-500 MG
00093726201	Glyburide-Metformin Tab 5-500 MG
00093726205	Glyburide-Metformin Tab 5-500 MG
00093727105	Pioglitazone HCl Tab 15 MG (Base Equiv)
00093727156	Pioglitazone HCl Tab 15 MG (Base Equiv)
00093727198	Pioglitazone HCl Tab 15 MG (Base Equiv)
00093727205	Pioglitazone HCl Tab 30 MG (Base Equiv)
00093727256	Pioglitazone HCl Tab 30 MG (Base Equiv)
00093727298	Pioglitazone HCl Tab 30 MG (Base Equiv)
00093727305	Pioglitazone HCl Tab 45 MG (Base Equiv)
00093727356	Pioglitazone HCl Tab 45 MG (Base Equiv)
00093727398	Pioglitazone HCl Tab 45 MG (Base Equiv)
00093745501	Glipizide-Metformin HCl Tab 2.5-250 MG
00093745601	Glipizide-Metformin HCl Tab 2.5-500 MG
00093745701	Glipizide-Metformin HCl Tab 5-500 MG
00093767706	Pioglitazone HCl-Metformin HCl Tab 15-500 MG
00093767786	Pioglitazone HCl-Metformin HCl Tab 15-500 MG
00093767806	Pioglitazone HCl-Metformin HCl Tab 15-850 MG
00093767886	Pioglitazone HCl-Metformin HCl Tab 15-850 MG
00093803401	Glyburide Micronized Tab 1.5 MG
00093803501	Glyburide Micronized Tab 3 MG
00093803505	Glyburide Micronized Tab 3 MG
00093803510	Glyburide Micronized Tab 3 MG
00093803601	Glyburide Micronized Tab 6 MG
00093834201	Glyburide Tab 1.25 MG
00093834301	Glyburide Tab 2.5 MG
00093834305	Glyburide Tab 2.5 MG
00093834310	Glyburide Tab 2.5 MG
00093834398	Glyburide Tab 2.5 MG
00093834401	Glyburide Tab 5 MG
00093834405	Glyburide Tab 5 MG
00093834410	Glyburide Tab 5 MG
00093834419	Glyburide Tab 5 MG
00093834493	Glyburide Tab 5 MG
00093834498	Glyburide Tab 5 MG
00093936401	Glyburide Tab 5 MG
00093936405	Glyburide Tab 5 MG
00093936410	Glyburide Tab 5 MG
00093943301	Glyburide Tab 2.5 MG
00093943305	Glyburide Tab 2.5 MG
00093947753	Glyburide Tab 1.25 MG
00115115001	Acarbose Tab 25 MG
00115115002	Acarbose Tab 25 MG
00115115101	Acarbose Tab 50 MG
00115115102	Acarbose Tab 50 MG
00115115201	Acarbose Tab 100 MG
00115115202	Acarbose Tab 100 MG
00143991801	Glyburide Micronized Tab 1.5 MG
00143991901	Glyburide Micronized Tab 3 MG
00143991905	Glyburide Micronized Tab 3 MG
00143992001	Glyburide Micronized Tab 6 MG
00143992005	Glyburide Micronized Tab 6 MG
00143992010	Glyburide Micronized Tab 6 MG
00169001771	Insulin Isophane & Regular (Human) Inj 100 Unit/ML (70-30)
00169004471	Insulin Regular (Human) Inj 100 Unit/ML
00169004571	Insulin Isophane (Human) Inj 100 Unit/ML
00169007011	Insulin Regular (Human) Inj Buffered 100 Unit/ML
00169008181	Repaglinide Tab 0.5 MG
00169008183	Repaglinide Tab 0.5 MG
00169008281	Repaglinide Tab 1 MG
00169008283	Repaglinide Tab 1 MG
00169008481	Repaglinide Tab 2 MG
00169008483	Repaglinide Tab 2 MG
00169009201	Repaglinide-Metformin HCl Tab 2-500 MG
00169009301	Repaglinide-Metformin HCl Tab 1-500 MG
00169183302	Insulin Regular (Human) Inj 100 Unit/ML
00169183311	Insulin Regular (Human) Inj 100 Unit/ML
00169183317	Insulin Regular (Human) Inj 100 Unit/ML
00169183402	Insulin NPH (Human) (Isophane) Inj 100 Unit/ML
00169183411	Insulin NPH (Human) (Isophane) Inj 100 Unit/ML
00169183417	Insulin Isophane (Human) Inj 100 Unit/ML
00169183511	Insulin Zinc (Human) Inj 100 Unit/ML
00169183702	Insulin NPH Isophane & Regular Human Inj 100 Unit/ML (70-30)
00169183711	Insulin NPH Isophane & Regular Human Inj 100 Unit/ML (70-30)
00169183717	Insulin Isophane & Regular (Human) Inj 100 Unit/ML (70-30)
00169231321	Insulin Regular (Human) Inj 100 Unit/ML
00169231421	Insulin Isophane (Human) Inj 100 Unit/ML
00169231721	Insulin Isophane & Regular (Human) Inj 100 Unit/ML (70-30)
00169255013	Insulin Degludec Soln Pen-Injector 200 Unit/ML
00169266015	Insulin Degludec Soln Pen-Injector 100 Unit/ML
00169330312	Insulin Aspart Soln Cartridge 100 Unit/ML
00169347318	Insulin Regular (Human) Inj 100 Unit/ML
00169347418	Insulin Isophane (Human) Inj 100 Unit/ML
00169347718	Insulin Isophane & Regular (Human) Inj 100 Unit/ML (70-30)
00169368213	Insulin Aspart Prot & Aspart (Human) Inj 100 Unit/ML (70-30)
00169368512	Insulin Aspart Prot & Aspart (Human) Inj 100 Unit/ML (70-30)
00169368712	Insulin Detemir Inj 100 Unit/ML
00169369619	Insulin Aspart Prot & Aspart Sus Pen-inj 100 Unit/ML (70-30)
00169406012	Liraglutide Soln Pen-injector 18 MG/3ML (6 MG/ML)
00169406013	Liraglutide Soln Pen-injector 18 MG/3ML (6 MG/ML)
00169633910	Insulin Aspart Soln Pen-injector 100 Unit/ML
00169643810	Insulin Detemir Soln Pen-injector 100 Unit/ML
00169643910	Insulin Detemir Soln Pen-injector 100 Unit/ML
00169750111	Insulin Aspart Inj 100 Unit/ML
00172297860	Tolazamide Tab 100 MG
00172297960	Tolazamide Tab 250 MG
00172297961	Tolazamide Tab 250 MG
00172297980	Tolazamide Tab 250 MG
00172298060	Tolazamide Tab 500 MG
00172298070	Tolazamide Tab 500 MG
00172364900	Glipizide Tab 5 MG
00172364910	Glipizide Tab 5 MG
00172364960	Glipizide Tab 5 MG
00172364970	Glipizide Tab 5 MG
00172365000	Glipizide Tab 10 MG
00172365010	Glipizide Tab 10 MG
00172365060	Glipizide Tab 10 MG
00172365070	Glipizide Tab 10 MG
00172571000	Glyburide-Metformin Tab 1.25-250 MG
00172571010	Glyburide-Metformin Tab 1.25-250 MG
00172571060	Glyburide-Metformin Tab 1.25-250 MG
00172571070	Glyburide-Metformin Tab 1.25-250 MG
00172571084	Glyburide-Metformin Tab 1.25-250 MG
00172571100	Glyburide-Metformin Tab 2.5-500 MG
00172571110	Glyburide-Metformin Tab 2.5-500 MG
00172571160	Glyburide-Metformin Tab 2.5-500 MG
00172571170	Glyburide-Metformin Tab 2.5-500 MG
00172571188	Glyburide-Metformin Tab 2.5-500 MG
00172571200	Glyburide-Metformin Tab 5-500 MG
00172571210	Glyburide-Metformin Tab 5-500 MG
00172571260	Glyburide-Metformin Tab 5-500 MG
00172571270	Glyburide-Metformin Tab 5-500 MG
00172571288	Glyburide-Metformin Tab 5-500 MG
00173083418	Rosiglitazone Maleate Tab 2 MG (Base Equiv)
00173083513	Rosiglitazone Maleate Tab 4 MG (Base Equiv)
00173083613	Rosiglitazone Maleate Tab 8 MG (Base Equiv)
00173083718	Rosiglitazone Maleate-Metformin HCl Tab 2-500 MG
00173083818	Rosiglitazone Maleate-Metformin HCl Tab 2-1000 MG
00173083918	Rosiglitazone Maleate-Metformin HCl Tab 4-500 MG
00173084018	Rosiglitazone Maleate-Metformin HCl Tab 4-1000 MG
00173084113	Rosiglitazone Maleate-Glimepiride Tab 4-1 MG
00173084213	Rosiglitazone Maleate-Glimepiride Tab 4-2 MG
00173084313	Rosiglitazone Maleate-Glimepiride Tab 4-4 MG
00173084413	Rosiglitazone Maleate-Glimepiride Tab 8-2 MG
00173084513	Rosiglitazone Maleate-Glimepiride Tab 8-4 MG
00173086118	Rosiglitazone Maleate Tab 2 MG (Base Equiv)
00173086313	Rosiglitazone Maleate Tab 4 MG (Base Equiv)
00173086413	Rosiglitazone Maleate Tab 8 MG (Base Equiv)
00173086601	Albiglutide For Soln Pen-injector 30 MG
00173086635	Albiglutide For Soln Pen-injector 30 MG
00173086701	Albiglutide For Soln Pen-injector 50 MG
00173086735	Albiglutide For Soln Pen-injector 50 MG
00182185189	Chlorpropamide Tab 100 MG
00182199400	Glipizide Tab 5 MG
00182199489	Glipizide Tab 5 MG
00182199500	Glipizide Tab 10 MG
00182199589	Glipizide Tab 10 MG
00182264600	Glyburide Tab 2.5 MG
00182264689	Glyburide Tab 2.5 MG
00182264700	Glyburide Tab 5 MG
00182264789	Glyburide Tab 5 MG
00228275111	Glyburide-Metformin Tab 1.25-250 MG
00228275150	Glyburide-Metformin Tab 1.25-250 MG
00228275211	Glyburide-Metformin Tab 2.5-500 MG
00228275250	Glyburide-Metformin Tab 2.5-500 MG
00228275311	Glyburide-Metformin Tab 5-500 MG
00228275350	Glyburide-Metformin Tab 5-500 MG
00228289803	Glipizide Tab SR 24HR 2.5 MG
00228289910	Glipizide Tab SR 24HR 5 MG
00228289950	Glipizide Tab SR 24HR 5 MG
00228289996	Glipizide Tab SR 24HR 5 MG
00228290010	Glipizide Tab SR 24HR 10 MG
00228290011	Glipizide Tab SR 24HR 10 MG
00228290050	Glipizide Tab SR 24HR 10 MG
00228290096	Glipizide Tab SR 24HR 10 MG
00247044400	Glipizide Tab 5 MG
00247044430	Glipizide Tab 5 MG
00247104530	Chlorpropamide Tab 250 MG
00247104545	Chlorpropamide Tab 250 MG
00247127000	Glyburide Tab 5 MG
00247127006	Glyburide Tab 5 MG
00310610030	Saxagliptin HCl Tab 2.5 MG (Base Equiv)
00310610090	Saxagliptin HCl Tab 2.5 MG (Base Equiv)
00310610530	Saxagliptin HCl Tab 5 MG (Base Equiv)
00310610550	Saxagliptin HCl Tab 5 MG (Base Equiv)
00310610590	Saxagliptin HCl Tab 5 MG (Base Equiv)
00310612560	Saxagliptin-Metformin HCl Tab SR 24HR 2.5-1000 MG
00310613530	Saxagliptin-Metformin HCl Tab SR 24HR 5-500 MG
00310614530	Saxagliptin-Metformin HCl Tab SR 24HR 5-1000 MG
00310620530	Dapagliflozin Propanediol Tab 5 MG (Base Equivalent)
00310621030	Dapagliflozin Propanediol Tab 10 MG (Base Equivalent)
00310625030	Dapagliflozin-Metformin HCl Tab SR 24HR 5-500 MG
00310626030	Dapagliflozin-Metformin HCl Tab SR 24HR 5-1000 MG
00310626060	Dapagliflozin-Metformin HCl Tab SR 24HR 5-1000 MG
00310627030	Dapagliflozin-Metformin HCl Tab SR 24HR 10-500 MG
00310628030	Dapagliflozin-Metformin HCl Tab SR 24HR 10-1000 MG
00310651201	Exenatide Soln Pen-injector 5 MCG/0.02ML
00310652004	Exenatide For Inj Extended Release Susp 2 MG
00310652401	Exenatide Soln Pen-injector 10 MCG/0.04ML
00310653004	Exenatide Extended Release for Susp Pen-injector 2 MG
00310661502	Pramlintide Acetate Pen-inj 1500 MCG/1.5ML (1000 MCG/ML)
00310662702	Pramlintide Acetate Pen-inj 2700 MCG/2.7ML (1000 MCG/ML)
00378004805	Pioglitazone HCl Tab 15 MG (Base Equiv)
00378004877	Pioglitazone HCl Tab 15 MG (Base Equiv)
00378004893	Pioglitazone HCl Tab 15 MG (Base Equiv)
00378019701	Chlorpropamide Tab 100 MG
00378019705	Chlorpropamide Tab 100 MG
00378021001	Chlorpropamide Tab 250 MG
00378021010	Chlorpropamide Tab 250 MG
00378021501	Tolbutamide Tab 500 MG
00378021505	Tolbutamide Tab 500 MG
00378021701	Tolazamide Tab 250 MG
00378022805	Pioglitazone HCl Tab 30 MG (Base Equiv)
00378022877	Pioglitazone HCl Tab 30 MG (Base Equiv)
00378022893	Pioglitazone HCl Tab 30 MG (Base Equiv)
00378031805	Pioglitazone HCl Tab 45 MG (Base Equiv)
00378031877	Pioglitazone HCl Tab 45 MG (Base Equiv)
00378031893	Pioglitazone HCl Tab 45 MG (Base Equiv)
00378034093	Glipizide Tab SR 24HR 2.5 MG
00378034201	Glipizide Tab SR 24HR 5 MG
00378034210	Glipizide Tab SR 24HR 5 MG
00378043101	Glipizide Tab SR 24HR 10 MG
00378043110	Glipizide Tab SR 24HR 10 MG
00378055101	Tolazamide Tab 500 MG
00378110501	Glipizide Tab 5 MG
00378110505	Glipizide Tab 5 MG
00378111001	Glipizide Tab 10 MG
00378111005	Glipizide Tab 10 MG
00378111301	Glyburide Micronized Tab 1.5 MG
00378112501	Glyburide Micronized Tab 3 MG
00378112510	Glyburide Micronized Tab 3 MG
00378114201	Glyburide Micronized Tab 6 MG
00378155091	Pioglitazone HCl-Metformin HCl Tab 15-500 MG
00378157591	Pioglitazone HCl-Metformin HCl Tab 15-850 MG
00378282010	Acarbose Tab 25 MG
00378282077	Acarbose Tab 25 MG
00378282110	Acarbose Tab 50 MG
00378282177	Acarbose Tab 50 MG
00378282210	Acarbose Tab 100 MG
00378282277	Acarbose Tab 100 MG
00378312101	Repaglinide Tab 0.5 MG
00378312105	Repaglinide Tab 0.5 MG
00378312201	Repaglinide Tab 1 MG
00378312301	Repaglinide Tab 2 MG
00378313101	Glipizide-Metformin HCl Tab 2.5-250 MG
00378313201	Glipizide-Metformin HCl Tab 2.5-500 MG
00378313301	Glipizide-Metformin HCl Tab 5-500 MG
00378401101	Glimepiride Tab 1 MG
00378401201	Glimepiride Tab 2 MG
00378401301	Glimepiride Tab 4 MG
00440756514	Glipizide Tab 5 MG
00440756530	Glipizide Tab 5 MG
00440756560	Glipizide Tab 5 MG
00440756590	Glipizide Tab 5 MG
00440756630	Glipizide Tab 10 MG
00440756660	Glipizide Tab 10 MG
00440756690	Glipizide Tab 10 MG
00440756691	Glipizide Tab 10 MG
00440756692	Glipizide Tab 10 MG
00440756890	Glipizide Tab SR 24HR 5 MG
00440756892	Glipizide Tab SR 24HR 5 MG
00440756990	Glipizide Tab SR 24HR 10 MG
00440756992	Glipizide Tab SR 24HR 10 MG
00440757020	Glyburide Tab 2.5 MG
00440757114	Glyburide Tab 5 MG
00440757130	Glyburide Tab 5 MG
00440757160	Glyburide Tab 5 MG
00440757190	Glyburide Tab 5 MG
00440757191	Glyburide Tab 5 MG
00440757192	Glyburide Tab 5 MG
00440757194	Glyburide Tab 5 MG
00440757195	Glyburide Tab 5 MG
00440758590	Glyburide-Metformin Tab 1.25-250 MG
00440758790	Glyburide-Metformin Tab 2.5-500 MG
00440758990	Glyburide-Metformin Tab 5-500 MG
00440758995	Glyburide-Metformin Tab 5-500 MG
00440856390	Tolazamide Tab 250 MG
00555044202	Acetohexamide Tab 250 MG
00555044302	Acetohexamide Tab 500 MG
00555062502	Glipizide-Metformin HCl Tab 2.5-250 MG
00555062602	Glipizide-Metformin HCl Tab 2.5-500 MG
00555062702	Glipizide-Metformin HCl Tab 5-500 MG
00574024001	Repaglinide Tab 0.5 MG
00574024101	Repaglinide Tab 1 MG
00574024201	Repaglinide Tab 2 MG
00591046001	Glipizide Tab 5 MG
00591046005	Glipizide Tab 5 MG
00591046010	Glipizide Tab 5 MG
00591046101	Glipizide Tab 10 MG
00591046105	Glipizide Tab 10 MG
00591046110	Glipizide Tab 10 MG
00591084401	Glipizide Tab SR 24HR 5 MG
00591084410	Glipizide Tab SR 24HR 5 MG
00591084415	Glipizide Tab SR 24HR 5 MG
00591084501	Glipizide Tab SR 24HR 10 MG
00591084510	Glipizide Tab SR 24HR 10 MG
00591084515	Glipizide Tab SR 24HR 10 MG
00591090030	Glipizide Tab SR 24HR 2.5 MG
00591320505	Pioglitazone HCl Tab 15 MG (Base Equiv)
00591320519	Pioglitazone HCl Tab 15 MG (Base Equiv)
00591320530	Pioglitazone HCl Tab 15 MG (Base Equiv)
00591320605	Pioglitazone HCl Tab 30 MG (Base Equiv)
00591320619	Pioglitazone HCl Tab 30 MG (Base Equiv)
00591320630	Pioglitazone HCl Tab 30 MG (Base Equiv)
00591320705	Pioglitazone HCl Tab 45 MG (Base Equiv)
00591320719	Pioglitazone HCl Tab 45 MG (Base Equiv)
00591320730	Pioglitazone HCl Tab 45 MG (Base Equiv)
00591335401	Nateglinide Tab 60 MG
00591335501	Nateglinide Tab 120 MG
00591397101	Glipizide-Metformin HCl Tab 2.5-250 MG
00591397201	Glipizide-Metformin HCl Tab 2.5-500 MG
00591397301	Glipizide-Metformin HCl Tab 5-500 MG
00597014030	Linagliptin Tab 5 MG
00597014061	Linagliptin Tab 5 MG
00597014090	Linagliptin Tab 5 MG
00597014618	Linagliptin-Metformin HCl Tab 2.5-500 MG
00597014660	Linagliptin-Metformin HCl Tab 2.5-500 MG
00597014718	Linagliptin-Metformin HCl Tab 2.5-850 MG
00597014760	Linagliptin-Metformin HCl Tab 2.5-850 MG
00597014818	Linagliptin-Metformin HCl Tab 2.5-1000 MG
00597014860	Linagliptin-Metformin HCl Tab 2.5-1000 MG
00597015230	Empagliflozin Tab 10 MG
00597015237	Empagliflozin Tab 10 MG
00597015290	Empagliflozin Tab 10 MG
00597015330	Empagliflozin Tab 25 MG
00597015337	Empagliflozin Tab 25 MG
00597015390	Empagliflozin Tab 25 MG
00597015918	Empagliflozin-Metformin HCl Tab 5-500 MG
00597015960	Empagliflozin-Metformin HCl Tab 5-500 MG
00597016430	Empagliflozin-Linagliptin Tab 25-5 MG
00597016439	Empagliflozin-Linagliptin Tab 25-5 MG
00597016490	Empagliflozin-Linagliptin Tab 25-5 MG
00597016818	Empagliflozin-Metformin HCl Tab 12.5-1000 MG
00597016860	Empagliflozin-Metformin HCl Tab 12.5-1000 MG
00597017518	Empagliflozin-Metformin HCl Tab 5-1000 MG
00597017560	Empagliflozin-Metformin HCl Tab 5-1000 MG
00597018018	Empagliflozin-Metformin HCl Tab 12.5-500 MG
00597018060	Empagliflozin-Metformin HCl Tab 12.5-500 MG
00597018230	Empagliflozin-Linagliptin Tab 10-5 MG
00597018239	Empagliflozin-Linagliptin Tab 10-5 MG
00597018290	Empagliflozin-Linagliptin Tab 10-5 MG
00603283521	Chlorpropamide Tab 100 MG
00603283621	Chlorpropamide Tab 250 MG
00603283632	Chlorpropamide Tab 250 MG
00603374421	Glimepiride Tab 1 MG
00603374428	Glimepiride Tab 1 MG
00603374521	Glimepiride Tab 2 MG
00603374528	Glimepiride Tab 2 MG
00603374621	Glimepiride Tab 4 MG
00603374628	Glimepiride Tab 4 MG
00615359553	Glipizide Tab 5 MG
00615359563	Glipizide Tab 5 MG
00615359653	Glipizide Tab 10 MG
00615359663	Glipizide Tab 10 MG
00781113801	Glyburide Tab 1.25 MG
00781114601	Glyburide Tab 2.5 MG
00781119101	Glyburide Tab 5 MG
00781119110	Glyburide Tab 5 MG
00781145201	Glipizide Tab 5 MG
00781145210	Glipizide Tab 5 MG
00781145301	Glipizide Tab 10 MG
00781145310	Glipizide Tab 10 MG
00781504501	Glimepiride Tab 1 MG
00781504601	Glimepiride Tab 2 MG
00781504701	Glimepiride Tab 4 MG
00781514801	Repaglinide Tab 0.5 MG
00781514901	Repaglinide Tab 1 MG
00781515001	Repaglinide Tab 2 MG
00781517001	Glyburide-Metformin Tab 1.25-250 MG
00781517101	Glyburide-Metformin Tab 2.5-500 MG
00781517105	Glyburide-Metformin Tab 2.5-500 MG
00781517201	Glyburide-Metformin Tab 5-500 MG
00781517205	Glyburide-Metformin Tab 5-500 MG
00781530401	Glipizide-Metformin HCl Tab 2.5-250 MG
00781530501	Glipizide-Metformin HCl Tab 2.5-500 MG
00781530601	Glipizide-Metformin HCl Tab 5-500 MG
00781542010	Pioglitazone HCl Tab 15 MG (Base Equiv)
00781542031	Pioglitazone HCl Tab 15 MG (Base Equiv)
00781542092	Pioglitazone HCl Tab 15 MG (Base Equiv)
00781542110	Pioglitazone HCl Tab 30 MG (Base Equiv)
00781542131	Pioglitazone HCl Tab 30 MG (Base Equiv)
00781542192	Pioglitazone HCl Tab 30 MG (Base Equiv)
00781542210	Pioglitazone HCl Tab 45 MG (Base Equiv)
00781542231	Pioglitazone HCl Tab 45 MG (Base Equiv)
00781542292	Pioglitazone HCl Tab 45 MG (Base Equiv)
00781562660	Pioglitazone HCl-Metformin HCl Tab 15-500 MG
00781562760	Pioglitazone HCl-Metformin HCl Tab 15-850 MG
00781563431	Pioglitazone HCl-Glimepiride Tab 30-2 MG
00781563531	Pioglitazone HCl-Glimepiride Tab 30-4 MG
00832049110	Glipizide Tab 5 MG
00832049111	Glipizide Tab 5 MG
00832049210	Glipizide Tab 10 MG
00832049211	Glipizide Tab 10 MG
00904022560	Chlorpropamide Tab 100 MG
00904022660	Chlorpropamide Tab 250 MG
00904612361	Glipizide Tab 10 MG
00904612461	Glipizide Tab 5 MG
00904613760	Glyburide Tab 1.25 MG
00904613840	Glyburide Tab 2.5 MG
00904613860	Glyburide Tab 2.5 MG
00904613960	Glyburide Tab 5 MG
00904613980	Glyburide Tab 5 MG
00904792440	Glipizide Tab 5 MG
00904792460	Glipizide Tab 5 MG
00904792461	Glipizide Tab 5 MG
00904792480	Glipizide Tab 5 MG
00904792540	Glipizide Tab 10 MG
00904792560	Glipizide Tab 10 MG
00904792561	Glipizide Tab 10 MG
00904792580	Glipizide Tab 10 MG
10370019001	Glipizide Tab SR 24HR 5 MG
10370019005	Glipizide Tab SR 24HR 5 MG
10370019101	Glipizide Tab SR 24HR 10 MG
10370019105	Glipizide Tab SR 24HR 10 MG
10544019230	Glipizide Tab 10 MG
10544021730	Glimepiride Tab 2 MG
10544021930	Glimepiride Tab 4 MG
10544057930	Glyburide-Metformin Tab 5-500 MG
10544057990	Glyburide-Metformin Tab 5-500 MG
10768715001	Glimepiride Tab 1 MG
10768747501	Glimepiride Tab 2 MG
10768770001	Glimepiride Tab 4 MG
12280000360	Rosiglitazone Maleate-Metformin HCl Tab 4-1000 MG
12280000460	Rosiglitazone Maleate-Metformin HCl Tab 4-500 MG
12280001200	Glipizide Tab SR 24HR 5 MG
12280002600	Glyburide-Metformin Tab 2.5-500 MG
12280002700	Glyburide-Metformin Tab 5-500 MG
12280002800	Glyburide Micronized Tab 1.5 MG
12280002900	Miglitol Tab 25 MG
12280006015	Pioglitazone HCl Tab 15 MG (Base Equiv)
12280006030	Pioglitazone HCl Tab 15 MG (Base Equiv)
12280006200	Rosiglitazone Maleate Tab 4 MG (Base Equiv)
12280006230	Rosiglitazone Maleate Tab 4 MG (Base Equiv)
12280006290	Rosiglitazone Maleate Tab 4 MG (Base Equiv)
12280007830	Rosiglitazone Maleate Tab 8 MG (Base Equiv)
12280025930	Glipizide Tab SR 24HR 10 MG
12280038700	Repaglinide Tab 2 MG
12280038730	Repaglinide Tab 2 MG
12280038800	Nateglinide Tab 120 MG
12280038830	Nateglinide Tab 120 MG
12280040130	Sitagliptin Phosphate Tab 100 MG (Base Equiv)
13411010101	Pioglitazone HCl Tab 15 MG (Base Equiv)
13411010103	Pioglitazone HCl Tab 15 MG (Base Equiv)
13411010106	Pioglitazone HCl Tab 15 MG (Base Equiv)
13411010109	Pioglitazone HCl Tab 15 MG (Base Equiv)
13411010115	Pioglitazone HCl Tab 15 MG (Base Equiv)
13411010201	Pioglitazone HCl Tab 30 MG (Base Equiv)
13411010203	Pioglitazone HCl Tab 30 MG (Base Equiv)
13411010206	Pioglitazone HCl Tab 30 MG (Base Equiv)
13411010209	Pioglitazone HCl Tab 30 MG (Base Equiv)
13411010215	Pioglitazone HCl Tab 30 MG (Base Equiv)
13411010301	Pioglitazone HCl Tab 45 MG (Base Equiv)
13411010303	Pioglitazone HCl Tab 45 MG (Base Equiv)
13411010306	Pioglitazone HCl Tab 45 MG (Base Equiv)
13411010309	Pioglitazone HCl Tab 45 MG (Base Equiv)
13411010315	Pioglitazone HCl Tab 45 MG (Base Equiv)
13668011905	Pioglitazone HCl Tab 30 MG (Base Equiv)
13668011930	Pioglitazone HCl Tab 30 MG (Base Equiv)
13668011990	Pioglitazone HCl Tab 30 MG (Base Equiv)
13668012005	Pioglitazone HCl Tab 45 MG (Base Equiv)
13668012030	Pioglitazone HCl Tab 45 MG (Base Equiv)
13668012090	Pioglitazone HCl Tab 45 MG (Base Equiv)
13668014005	Pioglitazone HCl Tab 15 MG (Base Equiv)
13668014030	Pioglitazone HCl Tab 15 MG (Base Equiv)
13668014090	Pioglitazone HCl Tab 15 MG (Base Equiv)
13668028033	Pioglitazone HCl-Metformin HCl Tab 15-500 MG
13668028060	Pioglitazone HCl-Metformin HCl Tab 15-500 MG
13668028133	Pioglitazone HCl-Metformin HCl Tab 15-850 MG
13668028160	Pioglitazone HCl-Metformin HCl Tab 15-850 MG
16252052301	Acarbose Tab 25 MG
16252052401	Acarbose Tab 50 MG
16252052501	Acarbose Tab 100 MG
16590028630	Glipizide Tab 5 MG
16590028660	Glipizide Tab 5 MG
16590028690	Glipizide Tab 5 MG
16590028730	Glipizide Tab 10 MG
16590028760	Glipizide Tab 10 MG
16590028790	Glipizide Tab 10 MG
16590094060	Glyburide Tab 5 MG
16729000101	Glimepiride Tab 1 MG
16729000201	Glimepiride Tab 2 MG
16729000301	Glimepiride Tab 4 MG
16729002010	Pioglitazone HCl Tab 15 MG (Base Equiv)
16729002015	Pioglitazone HCl Tab 15 MG (Base Equiv)
16729002016	Pioglitazone HCl Tab 15 MG (Base Equiv)
16729002110	Pioglitazone HCl Tab 30 MG (Base Equiv)
16729002115	Pioglitazone HCl Tab 30 MG (Base Equiv)
16729002116	Pioglitazone HCl Tab 30 MG (Base Equiv)
16729002210	Pioglitazone HCl Tab 45 MG (Base Equiv)
16729002215	Pioglitazone HCl Tab 45 MG (Base Equiv)
16729002216	Pioglitazone HCl Tab 45 MG (Base Equiv)
16729013900	Glipizide Tab 5 MG
16729013916	Glipizide Tab 5 MG
16729014000	Glipizide Tab 10 MG
16729014016	Glipizide Tab 10 MG
17236044101	Glipizide Tab 5 MG
17236044110	Glipizide Tab 5 MG
17236044201	Glipizide Tab 10 MG
17236044210	Glipizide Tab 10 MG
21695014715	Pioglitazone HCl Tab 15 MG (Base Equiv)
21695014815	Pioglitazone HCl Tab 30 MG (Base Equiv)
21695046730	Glyburide Tab 2.5 MG
21695046760	Glyburide Tab 2.5 MG
21695046830	Glyburide Tab 5 MG
21695046860	Glyburide Tab 5 MG
21695046872	Glyburide Tab 5 MG
21695046878	Glyburide Tab 5 MG
21695046930	Glipizide Tab 5 MG
21695046960	Glipizide Tab 5 MG
21695046978	Glipizide Tab 5 MG
21695046990	Glipizide Tab 5 MG
21695047000	Glipizide Tab 10 MG
21695047030	Glipizide Tab 10 MG
21695047060	Glipizide Tab 10 MG
21695047078	Glipizide Tab 10 MG
21695047090	Glipizide Tab 10 MG
21695056830	Glyburide-Metformin Tab 5-500 MG
21695056860	Glyburide-Metformin Tab 5-500 MG
21695074630	Glimepiride Tab 2 MG
21695074690	Glimepiride Tab 2 MG
21695074730	Glimepiride Tab 4 MG
21695074760	Glimepiride Tab 4 MG
21695074790	Glimepiride Tab 4 MG
21695089400	Glipizide-Metformin HCl Tab 5-500 MG
21695096730	Glipizide Tab SR 24HR 2.5 MG
21695099372	Glimepiride Tab 1 MG
23155005601	Glyburide Tab 1.25 MG
23155005701	Glyburide Tab 2.5 MG
23155005801	Glyburide Tab 5 MG
23155005810	Glyburide Tab 5 MG
23155011501	Glipizide-Metformin HCl Tab 2.5-250 MG
23155011601	Glipizide-Metformin HCl Tab 2.5-500 MG
23155011701	Glipizide-Metformin HCl Tab 5-500 MG
23155014701	Acarbose Tab 25 MG
23155014705	Acarbose Tab 25 MG
23155014710	Acarbose Tab 25 MG
23155014801	Acarbose Tab 50 MG
23155014805	Acarbose Tab 50 MG
23155014810	Acarbose Tab 50 MG
23155014901	Acarbose Tab 100 MG
23155014905	Acarbose Tab 100 MG
23155014910	Acarbose Tab 100 MG
23155023301	Glyburide-Metformin Tab 1.25-250 MG
23155023305	Glyburide-Metformin Tab 1.25-250 MG
23155023401	Glyburide-Metformin Tab 2.5-500 MG
23155023405	Glyburide-Metformin Tab 2.5-500 MG
23155023501	Glyburide-Metformin Tab 5-500 MG
23155023505	Glyburide-Metformin Tab 5-500 MG
23490010403	Pioglitazone HCl Tab 15 MG (Base Equiv)
23490010503	Pioglitazone HCl Tab 30 MG (Base Equiv)
23490010603	Pioglitazone HCl Tab 45 MG (Base Equiv)
23490011203	Sitagliptin Phosphate Tab 100 MG (Base Equiv)
23490210101	Insulin Lispro (Human) Inj 100 Unit/ML
23490210201	Insulin NPH (Human) (Isophane) Inj 100 Unit/ML
23490210301	Insulin Regular (Human) Inj 100 Unit/ML
23490210401	Insulin Detemir Soln Pen-injector 100 Unit/ML
23490210501	Insulin Aspart Prot & Aspart (Human) Inj 100 Unit/ML (70-30)
23490210601	Insulin Glargine Inj 100 Unit/ML
23490210701	Insulin Detemir Inj 100 Unit/ML
23490210801	Insulin Aspart Soln Pen-injector 100 Unit/ML
23490563201	Glipizide Tab 10 MG
23490563202	Glipizide Tab 10 MG
23490563203	Glipizide Tab 10 MG
23490563301	Glipizide Tab SR 24HR 10 MG
23490563403	Glipizide Tab 5 MG
23490563406	Glipizide Tab 5 MG
23490563409	Glipizide Tab 5 MG
23490563503	Glipizide Tab SR 24HR 5 MG
23490563603	Glipizide Tab SR 24HR 2.5 MG
23490563606	Glipizide Tab SR 24HR 2.5 MG
23490563609	Glipizide Tab SR 24HR 2.5 MG
23490563801	Glyburide Tab 2.5 MG
23490563802	Glyburide Tab 2.5 MG
23490563804	Glyburide Tab 2.5 MG
23490563901	Glyburide Tab 5 MG
23490563902	Glyburide Tab 5 MG
23490564003	Glimepiride Tab 4 MG
23490564006	Glimepiride Tab 4 MG
23490564007	Glimepiride Tab 4 MG
23490564106	Glimepiride Tab 2 MG
23490564107	Glimepiride Tab 2 MG
23490744803	Glyburide-Metformin Tab 2.5-500 MG
23490744806	Glyburide-Metformin Tab 2.5-500 MG
23490744901	Glyburide-Metformin Tab 5-500 MG
23490744906	Glyburide-Metformin Tab 5-500 MG
23490744909	Glyburide-Metformin Tab 5-500 MG
23629002210	Glimepiride Tab 1 MG
23629002310	Glyburide Micronized Tab 3 MG
33261020930	Glyburide Tab 5 MG
33261020960	Glyburide Tab 5 MG
33261020990	Glyburide Tab 5 MG
33261039700	Glipizide Tab 5 MG
33261039730	Glipizide Tab 5 MG
33261039760	Glipizide Tab 5 MG
33261039790	Glipizide Tab 5 MG
33261041100	Glyburide-Metformin Tab 5-500 MG
33261041130	Glyburide-Metformin Tab 5-500 MG
33261041160	Glyburide-Metformin Tab 5-500 MG
33261041190	Glyburide-Metformin Tab 5-500 MG
33261043300	Glipizide Tab 10 MG
33261043330	Glipizide Tab 10 MG
33261043360	Glipizide Tab 10 MG
33261043390	Glipizide Tab 10 MG
33261081330	Glyburide Tab 2.5 MG
33261081360	Glyburide Tab 2.5 MG
33261081390	Glyburide Tab 2.5 MG
33261082130	Glyburide-Metformin Tab 2.5-500 MG
33261082160	Glyburide-Metformin Tab 2.5-500 MG
33261082190	Glyburide-Metformin Tab 2.5-500 MG
33261083030	Glipizide Tab SR 24HR 5 MG
33261083060	Glipizide Tab SR 24HR 5 MG
33261083090	Glipizide Tab SR 24HR 5 MG
33261083130	Glimepiride Tab 2 MG
33261083160	Glimepiride Tab 2 MG
33261083190	Glimepiride Tab 2 MG
33261083530	Glipizide Tab SR 24HR 10 MG
33261083560	Glipizide Tab SR 24HR 10 MG
33261083590	Glipizide Tab SR 24HR 10 MG
33261089200	Glimepiride Tab 4 MG
33261089230	Glimepiride Tab 4 MG
33261089260	Glimepiride Tab 4 MG
33261089290	Glimepiride Tab 4 MG
33261096130	Glimepiride Tab 1 MG
33261096160	Glimepiride Tab 1 MG
33261096190	Glimepiride Tab 1 MG
33342005407	Pioglitazone HCl Tab 15 MG (Base Equiv)
33342005410	Pioglitazone HCl Tab 15 MG (Base Equiv)
33342005415	Pioglitazone HCl Tab 15 MG (Base Equiv)
33342005507	Pioglitazone HCl Tab 30 MG (Base Equiv)
33342005510	Pioglitazone HCl Tab 30 MG (Base Equiv)
33342005515	Pioglitazone HCl Tab 30 MG (Base Equiv)
33342005607	Pioglitazone HCl Tab 45 MG (Base Equiv)
33342005610	Pioglitazone HCl Tab 45 MG (Base Equiv)
33342005615	Pioglitazone HCl Tab 45 MG (Base Equiv)
33358015730	Glipizide Tab 10 MG
33358015760	Glipizide Tab 10 MG
33358015800	Glipizide Tab 5 MG
33358015830	Glipizide Tab 5 MG
33358015860	Glipizide Tab 5 MG
33358016030	Glyburide Tab 2.5 MG
33358016060	Glyburide Tab 2.5 MG
33358016101	Glyburide Tab 5 MG
33358016130	Glyburide Tab 5 MG
33358016160	Glyburide Tab 5 MG
33358016190	Glyburide Tab 5 MG
35356010200	Insulin Lispro (Human) Inj 100 Unit/ML
35356010330	Sitagliptin Phosphate Tab 100 MG (Base Equiv)
35356012190	Glipizide Tab SR 24HR 5 MG
35356013060	Pioglitazone HCl-Metformin HCl Tab 15-850 MG
35356013660	Sitagliptin-Metformin HCl Tab 50-500 MG
35356027160	Rosiglitazone Maleate Tab 2 MG (Base Equiv)
35356030301	Repaglinide Tab 0.5 MG
35356030401	Repaglinide Tab 1 MG
35356030501	Repaglinide Tab 2 MG
35356030602	Pramlintide Acetate Pen-inj 1500 MCG/1.5ML (1000 MCG/ML)
35356030702	Pramlintide Acetate Pen-inj 2700 MCG/2.7ML (1000 MCG/ML)
35356030801	Pramlintide Acetate Inj 600 MCG/ML (Base Equiv)
35356036030	Glyburide Tab 2.5 MG
35356036060	Glyburide Tab 2.5 MG
35356036090	Glyburide Tab 2.5 MG
35356087530	Glipizide Tab 10 MG
35356087560	Glipizide Tab 10 MG
35356089630	Glimepiride Tab 1 MG
35356089730	Glyburide-Metformin Tab 2.5-500 MG
35356089760	Glyburide-Metformin Tab 2.5-500 MG
35356089790	Glyburide-Metformin Tab 2.5-500 MG
35356089930	Glipizide Tab 10 MG
35356089960	Glipizide Tab 10 MG
35356089990	Glipizide Tab 10 MG
35356093130	Glipizide Tab SR 24HR 10 MG
35356093160	Glipizide Tab SR 24HR 10 MG
35356093190	Glipizide Tab SR 24HR 10 MG
35356093230	Glyburide-Metformin Tab 1.25-250 MG
35356093260	Glyburide-Metformin Tab 1.25-250 MG
35356093290	Glyburide-Metformin Tab 1.25-250 MG
35356097030	Glipizide-Metformin HCl Tab 2.5-250 MG
35356097060	Glipizide-Metformin HCl Tab 2.5-250 MG
35356097090	Glipizide-Metformin HCl Tab 2.5-250 MG
35356099530	Glyburide Tab 1.25 MG
35356099560	Glyburide Tab 1.25 MG
35356099590	Glyburide Tab 1.25 MG
38245036455	Glyburide Tab 5 MG
38245038120	Glyburide Micronized Tab 3 MG
38779043903	Glyburide Powder
38779043904	Glyburide Powder
38779043905	Glyburide Powder
38779070903	Glyburide Powder
38779070904	Glyburide Powder
38779070905	Glyburide Powder
38779070906	Glyburide Powder
38779070908	Glyburide Powder
38779076503	Glipizide Powder
38779076504	Glipizide Powder
38779076506	Glipizide Powder
42254007130	Glyburide-Metformin Tab 2.5-500 MG
42254009030	Glyburide Tab 5 MG
42254009060	Glyburide Tab 5 MG
42254009090	Glyburide Tab 5 MG
42254028130	Glyburide Micronized Tab 6 MG
42254028190	Glyburide Micronized Tab 6 MG
42291013010	Acarbose Tab 25 MG
42291013090	Acarbose Tab 25 MG
42291013110	Acarbose Tab 50 MG
42291013190	Acarbose Tab 50 MG
42291013210	Acarbose Tab 100 MG
42291013290	Acarbose Tab 100 MG
42291030501	Glipizide-Metformin HCl Tab 2.5-500 MG
42291030601	Glipizide-Metformin HCl Tab 5-500 MG
42291031650	Glyburide Tab 2.5 MG
42291031710	Glyburide Tab 5 MG
42291051360	Pioglitazone HCl-Metformin HCl Tab 15-850 MG
42291063601	Nateglinide Tab 60 MG
42291063701	Nateglinide Tab 120 MG
42291069360	Pioglitazone HCl-Metformin HCl Tab 15-500 MG
42291069460	Pioglitazone HCl-Metformin HCl Tab 15-850 MG
42291071990	Repaglinide Tab 1 MG
42291072090	Repaglinide Tab 2 MG
42549049830	Glimepiride Tab 4 MG
42549049930	Glimepiride Tab 2 MG
42571010001	Glimepiride Tab 1 MG
42571010005	Glimepiride Tab 1 MG
42571010101	Glimepiride Tab 2 MG
42571010105	Glimepiride Tab 2 MG
42571010301	Glimepiride Tab 4 MG
42571010305	Glimepiride Tab 4 MG
43063003430	Glimepiride Tab 2 MG
43063003490	Glimepiride Tab 2 MG
43063011990	Glyburide Micronized Tab 3 MG
43063012090	Glyburide Micronized Tab 6 MG
43063012130	Glimepiride Tab 1 MG
43063012190	Glimepiride Tab 1 MG
43063012230	Glimepiride Tab 4 MG
43063012290	Glimepiride Tab 4 MG
43063039786	Glyburide-Metformin Tab 5-500 MG
43063043314	Glyburide Tab 5 MG
43063043330	Glyburide Tab 5 MG
43063043386	Glyburide Tab 5 MG
43063043390	Glyburide Tab 5 MG
43063043393	Glyburide Tab 5 MG
43063058790	Glimepiride Tab 4 MG
43353036953	Glipizide Tab 10 MG
43353036960	Glipizide Tab 10 MG
43353036970	Glipizide Tab 10 MG
43353036980	Glipizide Tab 10 MG
43353036992	Glipizide Tab 10 MG
43353036994	Glipizide Tab 10 MG
43353037960	Glipizide Tab 5 MG
43353037973	Glipizide Tab 5 MG
43353037980	Glipizide Tab 5 MG
43353037992	Glipizide Tab 5 MG
43353037998	Glipizide Tab 5 MG
43353058280	Glyburide Tab 2.5 MG
43353065653	Glyburide Tab 5 MG
43353065660	Glyburide Tab 5 MG
43353065670	Glyburide Tab 5 MG
43353065680	Glyburide Tab 5 MG
43353065690	Glyburide Tab 5 MG
43353065692	Glyburide Tab 5 MG
43353065694	Glyburide Tab 5 MG
43353065960	Glyburide Tab 2.5 MG
43353065980	Glyburide Tab 2.5 MG
43353095109	Acarbose Tab 50 MG
43683012360	Glimepiride Tab 4 MG
43683012430	Glipizide Tab SR 24HR 5 MG
45802008765	Alogliptin Benzoate Tab 6.25 MG (Base Equiv)
45802010365	Alogliptin Benzoate Tab 12.5 MG (Base Equiv)
45802015065	Alogliptin Benzoate Tab 25 MG (Base Equiv)
45802016972	Alogliptin-Metformin HCl Tab 12.5-500 MG
45802021172	Alogliptin-Metformin HCl Tab 12.5-1000 MG
45802023865	Alogliptin-Pioglitazone Tab 12.5-15 MG
45802026065	Alogliptin-Pioglitazone Tab 12.5-30 MG
45802030465	Alogliptin-Pioglitazone Tab 12.5-45 MG
45802035165	Alogliptin-Pioglitazone Tab 25-15 MG
45802040265	Alogliptin-Pioglitazone Tab 25-30 MG
45802049965	Alogliptin-Pioglitazone Tab 25-45 MG
45802077078	Glimepiride Tab 1 MG
45802082278	Glimepiride Tab 2 MG
45802094778	Glimepiride Tab 4 MG
45963075302	Glyburide-Metformin Tab 5-500 MG
47463024130	Glimepiride Tab 2 MG
47463024230	Glimepiride Tab 1 MG
47463024330	Glimepiride Tab 4 MG
47463024360	Glimepiride Tab 4 MG
47463024430	Glipizide Tab 5 MG
47463024530	Glipizide Tab SR 24HR 10 MG
47463024560	Glipizide Tab SR 24HR 10 MG
47463024630	Glipizide-Metformin HCl Tab 2.5-500 MG
47463024730	Glipizide-Metformin HCl Tab 5-500 MG
47463024890	Glyburide Tab 5 MG
47463043460	Sitagliptin-Metformin HCl Tab 50-1000 MG
47463043560	Sitagliptin-Metformin HCl Tab 50-500 MG
47463058330	Pioglitazone HCl Tab 15 MG (Base Equiv)
47463058430	Pioglitazone HCl Tab 30 MG (Base Equiv)
47463058530	Pioglitazone HCl Tab 45 MG (Base Equiv)
47463076460	Rosiglitazone Maleate Tab 2 MG (Base Equiv)
47463076530	Rosiglitazone Maleate Tab 4 MG (Base Equiv)
47463076630	Rosiglitazone Maleate Tab 8 MG (Base Equiv)
47463077730	Sitagliptin Phosphate Tab 100 MG (Base Equiv)
47781034001	Acarbose Tab 25 MG
47781034101	Acarbose Tab 50 MG
47781034201	Acarbose Tab 100 MG
49452329901	Glipizide Powder
49452329902	Glipizide Powder
49452329903	Glipizide Powder
49452329904	Glipizide Powder
49452329905	Glipizide Powder
49452335501	Glyburide Powder
49452335502	Glyburide Powder
49452335504	Glyburide Powder
49452335601	Glyburide Powder
49452335602	Glyburide Powder
49884074501	Glipizide Tab SR 24HR 5 MG
49884074505	Glipizide Tab SR 24HR 5 MG
49884074601	Glipizide Tab SR 24HR 10 MG
49884074605	Glipizide Tab SR 24HR 10 MG
49884084501	Glimepiride Tab 1 MG
49884084601	Glimepiride Tab 2 MG
49884084701	Glimepiride Tab 4 MG
49884096701	Glyburide-Metformin Tab 1.25-250 MG
49884096705	Glyburide-Metformin Tab 1.25-250 MG
49884096801	Glyburide-Metformin Tab 2.5-500 MG
49884096805	Glyburide-Metformin Tab 2.5-500 MG
49884096901	Glyburide-Metformin Tab 5-500 MG
49884096905	Glyburide-Metformin Tab 5-500 MG
49884098401	Nateglinide Tab 60 MG
49884098501	Nateglinide Tab 120 MG
49999010700	Glipizide Tab 10 MG
49999010720	Glipizide Tab 10 MG
49999010730	Glipizide Tab 10 MG
49999010760	Glipizide Tab 10 MG
49999010790	Glipizide Tab 10 MG
49999010800	Glipizide Tab 5 MG
49999010830	Glipizide Tab 5 MG
49999010860	Glipizide Tab 5 MG
49999010890	Glipizide Tab 5 MG
49999011300	Glyburide Tab 5 MG
49999011301	Glyburide Tab 5 MG
49999011330	Glyburide Tab 5 MG
49999011360	Glyburide Tab 5 MG
49999011390	Glyburide Tab 5 MG
49999030430	Rosiglitazone Maleate Tab 4 MG (Base Equiv)
49999040130	Glyburide-Metformin Tab 5-500 MG
49999040160	Glyburide-Metformin Tab 5-500 MG
49999040190	Glyburide-Metformin Tab 5-500 MG
49999044915	Pioglitazone HCl Tab 15 MG (Base Equiv)
49999044930	Pioglitazone HCl Tab 15 MG (Base Equiv)
49999045030	Pioglitazone HCl Tab 30 MG (Base Equiv)
49999045130	Pioglitazone HCl Tab 45 MG (Base Equiv)
49999045190	Pioglitazone HCl Tab 45 MG (Base Equiv)
49999051430	Glipizide Tab SR 24HR 2.5 MG
49999057160	Glyburide Micronized Tab 6 MG
49999066030	Glyburide-Metformin Tab 5-500 MG
49999066060	Glyburide-Metformin Tab 5-500 MG
49999078100	Glimepiride Tab 2 MG
49999078130	Glimepiride Tab 2 MG
49999078160	Glimepiride Tab 2 MG
49999078190	Glimepiride Tab 2 MG
49999080700	Glimepiride Tab 4 MG
49999080730	Glimepiride Tab 4 MG
49999080760	Glimepiride Tab 4 MG
49999080790	Glimepiride Tab 4 MG
49999080800	Glyburide Micronized Tab 3 MG
49999093530	Rosiglitazone Maleate Tab 8 MG (Base Equiv)
49999099310	Insulin NPH Isophane & Regular Human Inj 100 Unit/ML (70-30)
49999099410	Insulin Glargine Inj 100 Unit/ML
50111037201	Chlorpropamide Tab 100 MG
50111037203	Chlorpropamide Tab 100 MG
50111037301	Chlorpropamide Tab 250 MG
50111037303	Chlorpropamide Tab 250 MG
50111058401	Glipizide Tab 5 MG
50111058402	Glipizide Tab 5 MG
50111058501	Glipizide Tab 10 MG
50111058502	Glipizide Tab 10 MG
50419086148	Acarbose Tab 50 MG
50419086151	Acarbose Tab 50 MG
50419086251	Acarbose Tab 100 MG
50419086351	Acarbose Tab 25 MG
50458014030	Canagliflozin Tab 100 MG
50458014090	Canagliflozin Tab 100 MG
50458014130	Canagliflozin Tab 300 MG
50458014190	Canagliflozin Tab 300 MG
50458054060	Canagliflozin-Metformin HCl Tab 50-500 MG
50458054160	Canagliflozin-Metformin HCl Tab 50-1000 MG
50458054260	Canagliflozin-Metformin HCl Tab 150-500 MG
50458054360	Canagliflozin-Metformin HCl Tab 150-1000 MG
51079006203	Repaglinide Tab 0.5 MG
51079020201	Chlorpropamide Tab 100 MG
51079020220	Chlorpropamide Tab 100 MG
51079020301	Chlorpropamide Tab 250 MG
51079020320	Chlorpropamide Tab 250 MG
51079029220	Tolazamide Tab 250 MG
51079029320	Tolazamide Tab 500 MG
51079042501	Glimepiride Tab 2 MG
51079042520	Glimepiride Tab 2 MG
51079042601	Glimepiride Tab 4 MG
51079042620	Glimepiride Tab 4 MG
51079051301	Pioglitazone HCl Tab 15 MG (Base Equiv)
51079051320	Pioglitazone HCl Tab 15 MG (Base Equiv)
51079051401	Pioglitazone HCl Tab 30 MG (Base Equiv)
51079051420	Pioglitazone HCl Tab 30 MG (Base Equiv)
51079051501	Pioglitazone HCl Tab 45 MG (Base Equiv)
51079051520	Pioglitazone HCl Tab 45 MG (Base Equiv)
51079053901	Repaglinide Tab 1 MG
51079053903	Repaglinide Tab 1 MG
51079055501	Repaglinide Tab 2 MG
51079055503	Repaglinide Tab 2 MG
51079056001	Tolbutamide Tab 500 MG
51079056020	Tolbutamide Tab 500 MG
51079081001	Glipizide Tab 5 MG
51079081017	Glipizide Tab 5 MG
51079081019	Glipizide Tab 5 MG
51079081020	Glipizide Tab 5 MG
51079081101	Glipizide Tab 10 MG
51079081117	Glipizide Tab 10 MG
51079081119	Glipizide Tab 10 MG
51079081120	Glipizide Tab 10 MG
51079087201	Glyburide Tab 2.5 MG
51079087217	Glyburide Tab 2.5 MG
51079087219	Glyburide Tab 2.5 MG
51079087220	Glyburide Tab 2.5 MG
51079087301	Glyburide Tab 5 MG
51079087317	Glyburide Tab 5 MG
51079087319	Glyburide Tab 5 MG
51079087320	Glyburide Tab 5 MG
51138021415	Pioglitazone HCl Tab 15 MG (Base Equiv)
51138021430	Pioglitazone HCl Tab 15 MG (Base Equiv)
51138021515	Pioglitazone HCl Tab 30 MG (Base Equiv)
51138021530	Pioglitazone HCl Tab 30 MG (Base Equiv)
51138021615	Pioglitazone HCl Tab 45 MG (Base Equiv)
51138021630	Pioglitazone HCl Tab 45 MG (Base Equiv)
51138025130	Glipizide Tab 5 MG
51138025230	Glipizide Tab 10 MG
51138026530	Glipizide Tab SR 24HR 2.5 MG
51138026630	Glipizide Tab SR 24HR 5 MG
51138026730	Glipizide Tab SR 24HR 10 MG
51138026830	Glipizide Tab SR 24HR 5 MG
51138026930	Glipizide Tab SR 24HR 10 MG
51138027030	Glipizide Tab 5 MG
51138027130	Glipizide Tab 10 MG
51138033730	Glimepiride Tab 1 MG
51138033830	Glimepiride Tab 2 MG
51138033930	Glimepiride Tab 4 MG
51138036730	Glyburide Micronized Tab 1.5 MG
51138036830	Glyburide Micronized Tab 3 MG
51138036930	Glyburide Micronized Tab 6 MG
51138037030	Glyburide Tab 1.25 MG
51138037130	Glyburide Tab 2.5 MG
51138037210	Glyburide Tab 5 MG
51138037230	Glyburide Tab 5 MG
51138047030	Glyburide-Metformin Tab 1.25-250 MG
51138047130	Glyburide-Metformin Tab 2.5-500 MG
51138047230	Glyburide-Metformin Tab 5-500 MG
51138047330	Glyburide-Metformin Tab 1.25-250 MG
51138047430	Glyburide-Metformin Tab 2.5-500 MG
51138047530	Glyburide-Metformin Tab 5-500 MG
51138047930	Sitagliptin Phosphate Tab 25 MG (Base Equiv)
51138048030	Sitagliptin Phosphate Tab 50 MG (Base Equiv)
51138048130	Sitagliptin Phosphate Tab 100 MG (Base Equiv)
51138049520	Rosiglitazone Maleate-Metformin HCl Tab 2-500 MG
51138049530	Rosiglitazone Maleate-Metformin HCl Tab 2-500 MG
51138049630	Rosiglitazone Maleate-Metformin HCl Tab 4-500 MG
51138049730	Rosiglitazone Maleate-Metformin HCl Tab 2-1000 MG
51138049830	Rosiglitazone Maleate-Metformin HCl Tab 4-1000 MG
51138049930	Rosiglitazone Maleate Tab 2 MG (Base Equiv)
51138050030	Rosiglitazone Maleate Tab 4 MG (Base Equiv)
51138050130	Rosiglitazone Maleate Tab 8 MG (Base Equiv)
51138052630	Sitagliptin-Metformin HCl Tab 50-500 MG
51138052730	Sitagliptin-Metformin HCl Tab 50-1000 MG
51552106402	Glipizide Powder
51655001177	Glyburide Tab 5 MG
51655001277	Glyburide Tab 2.5 MG
51655028924	Glipizide Tab 10 MG
51655029724	Chlorpropamide Tab 250 MG
51655075324	Glyburide Tab 2.5 MG
51655075877	Glyburide Tab 1.25 MG
51655090425	Glyburide Tab 5 MG
51655094724	Glyburide Tab 5 MG
51655094725	Glyburide Tab 5 MG
51862021001	Acarbose Tab 25 MG
51862021101	Acarbose Tab 50 MG
51862021201	Acarbose Tab 100 MG
51927267800	Glyburide Powder
51927311100	Glipizide Powder
51991070810	Pioglitazone HCl Tab 15 MG (Base Equiv)
51991070833	Pioglitazone HCl Tab 15 MG (Base Equiv)
51991070890	Pioglitazone HCl Tab 15 MG (Base Equiv)
51991070910	Pioglitazone HCl Tab 30 MG (Base Equiv)
51991070933	Pioglitazone HCl Tab 30 MG (Base Equiv)
51991070990	Pioglitazone HCl Tab 30 MG (Base Equiv)
51991071010	Pioglitazone HCl Tab 45 MG (Base Equiv)
51991071033	Pioglitazone HCl Tab 45 MG (Base Equiv)
51991071090	Pioglitazone HCl Tab 45 MG (Base Equiv)
51991085301	Repaglinide Tab 0.5 MG
51991085401	Repaglinide Tab 1 MG
51991085501	Repaglinide Tab 2 MG
52152013302	Glyburide Micronized Tab 1.5 MG
52152013402	Glyburide Micronized Tab 3 MG
52152013404	Glyburide Micronized Tab 3 MG
52152013405	Glyburide Micronized Tab 3 MG
52152013502	Glyburide Micronized Tab 6 MG
52152013504	Glyburide Micronized Tab 6 MG
52152013505	Glyburide Micronized Tab 6 MG
52343005305	Pioglitazone HCl Tab 15 MG (Base Equiv)
52343005330	Pioglitazone HCl Tab 15 MG (Base Equiv)
52343005390	Pioglitazone HCl Tab 15 MG (Base Equiv)
52343005405	Pioglitazone HCl Tab 30 MG (Base Equiv)
52343005430	Pioglitazone HCl Tab 30 MG (Base Equiv)
52343005490	Pioglitazone HCl Tab 30 MG (Base Equiv)
52343005505	Pioglitazone HCl Tab 45 MG (Base Equiv)
52343005530	Pioglitazone HCl Tab 45 MG (Base Equiv)
52343005590	Pioglitazone HCl Tab 45 MG (Base Equiv)
52544046001	Glipizide Tab 5 MG
52544046005	Glipizide Tab 5 MG
52544046010	Glipizide Tab 5 MG
52544055801	Glyburide Micronized Tab 1.5 MG
52959017730	Glyburide Tab 5 MG
52959044901	Glyburide Tab 5 MG
52959044930	Glyburide Tab 5 MG
52959044960	Glyburide Tab 5 MG
52959059890	Glyburide Tab 1.25 MG
52959082200	Glipizide Tab 10 MG
52959082230	Glipizide Tab 10 MG
52959082260	Glipizide Tab 10 MG
52959082320	Glipizide Tab 5 MG
52959082360	Glipizide Tab 5 MG
52959088800	Glimepiride Tab 4 MG
52959088830	Glimepiride Tab 4 MG
52959093630	Glimepiride Tab 2 MG
52959093660	Glimepiride Tab 2 MG
53002044600	Glipizide Tab 5 MG
53002044630	Glipizide Tab 5 MG
53002044660	Glipizide Tab 5 MG
53002111100	Glipizide Tab 10 MG
53002111103	Glipizide Tab 10 MG
53002111106	Glipizide Tab 10 MG
53217009530	Pioglitazone HCl Tab 30 MG (Base Equiv)
53217009590	Pioglitazone HCl Tab 30 MG (Base Equiv)
53217013330	Acarbose Tab 50 MG
53217013360	Acarbose Tab 50 MG
53217013390	Acarbose Tab 50 MG
53217019630	Glipizide Tab 10 MG
53217019660	Glipizide Tab 10 MG
53217019690	Glipizide Tab 10 MG
54348009830	Tolazamide Tab 250 MG
54348010430	Glyburide Tab 5 MG
54458086410	Pioglitazone HCl Tab 45 MG (Base Equiv)
54458086510	Pioglitazone HCl Tab 30 MG (Base Equiv)
54458086610	Pioglitazone HCl Tab 15 MG (Base Equiv)
54458088310	Pioglitazone HCl Tab 45 MG (Base Equiv)
54458088410	Pioglitazone HCl Tab 30 MG (Base Equiv)
54458088510	Pioglitazone HCl Tab 15 MG (Base Equiv)
54458096610	Glimepiride Tab 4 MG
54458096710	Glimepiride Tab 2 MG
54458096810	Glimepiride Tab 1 MG
54458097110	Glimepiride Tab 4 MG
54458097210	Glimepiride Tab 2 MG
54458097310	Glimepiride Tab 1 MG
54569020000	Glyburide Tab 5 MG
54569020300	Chlorpropamide Tab 250 MG
54569020301	Chlorpropamide Tab 250 MG
54569020601	Glipizide Tab 5 MG
54569020602	Glipizide Tab 5 MG
54569020603	Glipizide Tab 5 MG
54569165101	Insulin Isophane Inj 100 Unit/ML
54569201701	Chlorpropamide Tab 100 MG
54569231800	Insulin NPH (Human) (Isophane) Inj 100 Unit/ML
54569231900	Insulin Regular (Human) Inj 100 Unit/ML
54569291800	Insulin NPH Isophane & Regular Human Inj 100 Unit/ML (70-30)
54569291801	Insulin Isophane & Regular (Human) Inj 100 Unit/ML (70-30)
54569291802	Insulin Isophane & Regular (Human) Inj 100 Unit/ML (70-30)
54569295101	Insulin (Regular) Inj 100 Unit/ML
54569346700	Insulin NPH Isophane & Regular Human Inj 100 Unit/ML (70-30)
54569346701	Insulin Isophane & Regular (Human) Inj 100 Unit/ML (70-30)
54569369000	Glyburide Micronized Tab 3 MG
54569369001	Glyburide Micronized Tab 3 MG
54569383000	Glyburide Tab 2.5 MG
54569383001	Glyburide Tab 2.5 MG
54569383002	Glyburide Tab 2.5 MG
54569383100	Glyburide Tab 5 MG
54569383101	Glyburide Tab 5 MG
54569383102	Glyburide Tab 5 MG
54569383104	Glyburide Tab 5 MG
54569383108	Glyburide Tab 5 MG
54569383109	Glyburide Tab 5 MG
54569383200	Glyburide Tab 1.25 MG
54569383300	Insulin Regular (Human) Inj 100 Unit/ML
54569383301	Insulin Regular (Human) Inj 100 Unit/ML
54569383302	Insulin Regular (Human) Inj 100 Unit/ML
54569383400	Insulin Zinc (Human) Inj 100 Unit/ML
54569383500	Insulin NPH (Human) (Isophane) Inj 100 Unit/ML
54569383501	Insulin Isophane (Human) Inj 100 Unit/ML
54569383502	Insulin Isophane (Human) Inj 100 Unit/ML
54569384100	Glipizide Tab 5 MG
54569384101	Glipizide Tab 5 MG
54569384102	Glipizide Tab 5 MG
54569384103	Glipizide Tab 5 MG
54569384104	Glipizide Tab 5 MG
54569384200	Glipizide Tab 10 MG
54569384201	Glipizide Tab 10 MG
54569384202	Glipizide Tab 10 MG
54569384204	Glipizide Tab 10 MG
54569384205	Glipizide Tab 10 MG
54569384206	Glipizide Tab 10 MG
54569393700	Glipizide Tab SR 24HR 5 MG
54569393800	Glipizide Tab SR 24HR 10 MG
54569393801	Glipizide Tab SR 24HR 10 MG
54569445300	Glimepiride Tab 4 MG
54569445301	Glimepiride Tab 4 MG
54569450100	Acarbose Tab 50 MG
54569454800	Acarbose Tab 25 MG
54569459700	Repaglinide Tab 0.5 MG
54569469500	Glyburide Micronized Tab 6 MG
54569469501	Glyburide Micronized Tab 6 MG
54569470600	Glimepiride Tab 2 MG
54569480100	Rosiglitazone Maleate Tab 2 MG (Base Equiv)
54569480200	Rosiglitazone Maleate Tab 4 MG (Base Equiv)
54569480300	Rosiglitazone Maleate Tab 8 MG (Base Equiv)
54569488000	Pioglitazone HCl Tab 15 MG (Base Equiv)
54569488100	Pioglitazone HCl Tab 30 MG (Base Equiv)
54569488200	Pioglitazone HCl Tab 45 MG (Base Equiv)
54569521000	Glyburide-Metformin Tab 2.5-500 MG
54569521001	Glyburide-Metformin Tab 2.5-500 MG
54569521100	Glyburide-Metformin Tab 5-500 MG
54569521101	Glyburide-Metformin Tab 5-500 MG
54569522500	Repaglinide Tab 1 MG
54569522600	Repaglinide Tab 2 MG
54569532100	Insulin Lispro Prot & Lispro (Human) Inj 100 Unit/ML (75-25)
54569554700	Glipizide Tab SR 24HR 5 MG
54569554701	Glipizide Tab SR 24HR 5 MG
54569554702	Glipizide Tab SR 24HR 5 MG
54569554800	Glipizide Tab SR 24HR 10 MG
54569554801	Glipizide Tab SR 24HR 10 MG
54569554802	Glipizide Tab SR 24HR 10 MG
54569560300	Rosiglitazone Maleate-Metformin HCl Tab 2-500 MG
54569560500	Insulin Glargine Inj 100 Unit/ML
54569561800	Glyburide-Metformin Tab 2.5-500 MG
54569561801	Glyburide-Metformin Tab 2.5-500 MG
54569561802	Glyburide-Metformin Tab 2.5-500 MG
54569561803	Glyburide-Metformin Tab 2.5-500 MG
54569561900	Glyburide-Metformin Tab 5-500 MG
54569561901	Glyburide-Metformin Tab 5-500 MG
54569561902	Glyburide-Metformin Tab 5-500 MG
54569561903	Glyburide-Metformin Tab 5-500 MG
54569561904	Glyburide-Metformin Tab 5-500 MG
54569585500	Glimepiride Tab 4 MG
54569585501	Glimepiride Tab 4 MG
54569585502	Glimepiride Tab 4 MG
54569585503	Glimepiride Tab 4 MG
54569592500	Sitagliptin Phosphate Tab 100 MG (Base Equiv)
54569599100	Glipizide-Metformin HCl Tab 2.5-250 MG
54569599200	Glipizide-Metformin HCl Tab 2.5-500 MG
54569599201	Glipizide-Metformin HCl Tab 2.5-500 MG
54569599300	Glipizide-Metformin HCl Tab 5-500 MG
54569599301	Glipizide-Metformin HCl Tab 5-500 MG
54569606100	Acarbose Tab 50 MG
54569607200	Glimepiride Tab 2 MG
54569607201	Glimepiride Tab 2 MG
54569607202	Glimepiride Tab 2 MG
54569607203	Glimepiride Tab 2 MG
54569630000	Insulin Detemir Inj 100 Unit/ML
54569630100	Insulin Detemir Soln Pen-injector 100 Unit/ML
54569630101	Insulin Detemir Soln Pen-injector 100 Unit/ML
54569635400	Pioglitazone HCl Tab 15 MG (Base Equiv)
54569635401	Pioglitazone HCl Tab 15 MG (Base Equiv)
54569635500	Pioglitazone HCl Tab 30 MG (Base Equiv)
54569635501	Pioglitazone HCl Tab 30 MG (Base Equiv)
54569635600	Pioglitazone HCl Tab 45 MG (Base Equiv)
54569635601	Pioglitazone HCl Tab 45 MG (Base Equiv)
54569643500	Insulin Lispro (Human) Inj 100 Unit/ML
54569646200	Insulin Glargine Soln Pen-Injector 100 Unit/ML
54569646201	Insulin Glargine Soln Pen-Injector 100 Unit/ML
54569650700	Liraglutide Soln Pen-injector 18 MG/3ML (6 MG/ML)
54569657000	Insulin Detemir Soln Pen-injector 100 Unit/ML
54569658400	Insulin Aspart Inj 100 Unit/ML
54569658500	Insulin Lispro (Human) Soln Pen-injector 100 Unit/ML
54569658600	Insulin Aspart Soln Cartridge 100 Unit/ML
54569658700	Insulin Aspart Soln Pen-injector 100 Unit/ML
54569662500	Insulin Glargine Soln Pen-Injector 300 Unit/ML
54569663000	Insulin Aspart Prot & Aspart (Human) Inj 100 Unit/ML (70-30)
54569663100	Insulin Aspart Prot & Aspart Sus Pen-inj 100 Unit/ML (70-30)
54868003600	Chlorpropamide Tab 250 MG
54868003602	Chlorpropamide Tab 250 MG
54868003604	Chlorpropamide Tab 250 MG
54868011200	Insulin Detemir Inj 100 Unit/ML
54868037301	Glyburide Tab 2.5 MG
54868037302	Glyburide Tab 2.5 MG
54868079500	Glipizide-Metformin HCl Tab 2.5-250 MG
54868087701	Chlorpropamide Tab 100 MG
54868099601	Glyburide Tab 5 MG
54868099602	Glyburide Tab 5 MG
54868099701	Glipizide Tab 5 MG
54868099702	Glipizide Tab 5 MG
54868099704	Glipizide Tab 5 MG
54868102000	Tolazamide Tab 250 MG
54868108900	Glipizide Tab 10 MG
54868108901	Glipizide Tab 10 MG
54868108902	Glipizide Tab 10 MG
54868108903	Glipizide Tab 10 MG
54868109700	Sitagliptin-Metformin HCl Tab 50-1000 MG
54868109701	Sitagliptin-Metformin HCl Tab 50-1000 MG
54868124400	Glyburide Tab 2.5 MG
54868124401	Glyburide Tab 2.5 MG
54868124402	Glyburide Tab 2.5 MG
54868124403	Glyburide Tab 2.5 MG
54868124404	Glyburide Tab 2.5 MG
54868124501	Glyburide Tab 5 MG
54868124502	Glyburide Tab 5 MG
54868124503	Glyburide Tab 5 MG
54868124505	Glyburide Tab 5 MG
54868136101	Tolbutamide Tab 500 MG
54868142901	Insulin NPH (Human) (Isophane) Inj 100 Unit/ML
54868168801	Glyburide Tab 1.25 MG
54868238001	Insulin NPH (Human) (Isophane) Inj 100 Unit/ML
54868274600	Insulin NPH Isophane & Regular Human Inj 100 Unit/ML (70-30)
54868277700	Insulin Aspart Inj 100 Unit/ML
54868301700	Glyburide Micronized Tab 3 MG
54868326500	Glyburide Tab 5 MG
54868326501	Glyburide Tab 5 MG
54868326502	Glyburide Tab 5 MG
54868326503	Glyburide Tab 5 MG
54868326504	Glyburide Tab 5 MG
54868326505	Glyburide Tab 5 MG
54868326506	Glyburide Tab 5 MG
54868326600	Glyburide Tab 2.5 MG
54868326601	Glyburide Tab 2.5 MG
54868326602	Glyburide Tab 2.5 MG
54868326603	Glyburide Tab 2.5 MG
54868326604	Glyburide Tab 2.5 MG
54868331801	Glipizide Tab 5 MG
54868331802	Glipizide Tab 5 MG
54868331803	Glipizide Tab 5 MG
54868331804	Glipizide Tab 5 MG
54868331805	Glipizide Tab 5 MG
54868331901	Glipizide Tab 10 MG
54868331902	Glipizide Tab 10 MG
54868331903	Glipizide Tab 10 MG
54868331904	Glipizide Tab 10 MG
54868331905	Glipizide Tab 10 MG
54868331906	Glipizide Tab 10 MG
54868331907	Glipizide Tab 10 MG
54868332700	Glimepiride Tab 1 MG
54868333400	Glipizide Tab SR 24HR 10 MG
54868333401	Glipizide Tab SR 24HR 10 MG
54868333402	Glipizide Tab SR 24HR 10 MG
54868333403	Glipizide Tab SR 24HR 10 MG
54868333404	Glipizide Tab SR 24HR 10 MG
54868333500	Glipizide Tab SR 24HR 5 MG
54868333501	Glipizide Tab SR 24HR 5 MG
54868333502	Glipizide Tab SR 24HR 5 MG
54868333503	Glipizide Tab SR 24HR 5 MG
54868337700	Glimepiride Tab 4 MG
54868337701	Glimepiride Tab 4 MG
54868337702	Glimepiride Tab 4 MG
54868337703	Glimepiride Tab 4 MG
54868342600	Glyburide Tab 1.25 MG
54868342601	Glyburide Tab 1.25 MG
54868347400	Insulin NPH Isophane & Regular Human Inj 100 Unit/ML (70-30)
54868359800	Insulin Regular (Human) Inj 100 Unit/ML
54868361900	Insulin Regular (Human) Inj 100 Unit/ML
54868371100	Glyburide Micronized Tab 6 MG
54868371101	Glyburide Micronized Tab 6 MG
54868382301	Acarbose Tab 50 MG
54868409100	Glyburide Micronized Tab 3 MG
54868409101	Glyburide Micronized Tab 3 MG
54868409102	Glyburide Micronized Tab 3 MG
54868409103	Glyburide Micronized Tab 3 MG
54868419800	Rosiglitazone Maleate Tab 4 MG (Base Equiv)
54868419801	Rosiglitazone Maleate Tab 4 MG (Base Equiv)
54868420300	Miglitol Tab 50 MG
54868420500	Glimepiride Tab 2 MG
54868420501	Glimepiride Tab 2 MG
54868420502	Glimepiride Tab 2 MG
54868420600	Glimepiride Tab 4 MG
54868420601	Glimepiride Tab 4 MG
54868420603	Glimepiride Tab 4 MG
54868420604	Glimepiride Tab 4 MG
54868422100	Rosiglitazone Maleate Tab 8 MG (Base Equiv)
54868434300	Pioglitazone HCl Tab 15 MG (Base Equiv)
54868434301	Pioglitazone HCl Tab 15 MG (Base Equiv)
54868435400	Pioglitazone HCl Tab 30 MG (Base Equiv)
54868435401	Pioglitazone HCl Tab 30 MG (Base Equiv)
54868438100	Insulin Lispro Prot & Lispro (Human) Inj 100 Unit/ML (75-25)
54868439100	Pioglitazone HCl Tab 45 MG (Base Equiv)
54868439101	Pioglitazone HCl Tab 45 MG (Base Equiv)
54868441200	Glimepiride Tab 1 MG
54868441201	Glimepiride Tab 1 MG
54868441202	Glimepiride Tab 1 MG
54868442000	Glipizide Tab SR 24HR 2.5 MG
54868452900	Glyburide-Metformin Tab 5-500 MG
54868452901	Glyburide-Metformin Tab 5-500 MG
54868452902	Glyburide-Metformin Tab 5-500 MG
54868452903	Glyburide-Metformin Tab 5-500 MG
54868460900	Glyburide-Metformin Tab 2.5-500 MG
54868460901	Glyburide-Metformin Tab 2.5-500 MG
54868462600	Insulin Glargine Inj 100 Unit/ML
54868484200	Glyburide Micronized Tab 6 MG
54868484201	Glyburide Micronized Tab 6 MG
54868484202	Glyburide Micronized Tab 6 MG
54868490600	Glyburide-Metformin Tab 1.25-250 MG
54868496500	Rosiglitazone Maleate-Metformin HCl Tab 2-500 MG
54868496501	Rosiglitazone Maleate-Metformin HCl Tab 2-500 MG
54868496502	Rosiglitazone Maleate-Metformin HCl Tab 2-500 MG
54868498800	Glipizide Tab SR 24HR 10 MG
54868498801	Glipizide Tab SR 24HR 10 MG
54868498802	Glipizide Tab SR 24HR 10 MG
54868498803	Glipizide Tab SR 24HR 10 MG
54868498804	Glipizide Tab SR 24HR 10 MG
54868510800	Insulin Lispro (Human) Inj 100 Unit/ML
54868514800	Glyburide-Metformin Tab 2.5-500 MG
54868514801	Glyburide-Metformin Tab 2.5-500 MG
54868514802	Glyburide-Metformin Tab 2.5-500 MG
54868514803	Glyburide-Metformin Tab 2.5-500 MG
54868514804	Glyburide-Metformin Tab 2.5-500 MG
54868515600	Nateglinide Tab 60 MG
54868515601	Nateglinide Tab 60 MG
54868515700	Rosiglitazone Maleate-Metformin HCl Tab 4-500 MG
54868515701	Rosiglitazone Maleate-Metformin HCl Tab 4-500 MG
54868518500	Glyburide-Metformin Tab 1.25-250 MG
54868518501	Glyburide-Metformin Tab 1.25-250 MG
54868518502	Glyburide-Metformin Tab 1.25-250 MG
54868518503	Glyburide-Metformin Tab 1.25-250 MG
54868518800	Glipizide-Metformin HCl Tab 2.5-500 MG
54868518801	Glipizide-Metformin HCl Tab 2.5-500 MG
54868518802	Glipizide-Metformin HCl Tab 2.5-500 MG
54868520100	Insulin Aspart Prot & Aspart (Human) Inj 100 Unit/ML (70-30)
54868521000	Glipizide Tab SR 24HR 5 MG
54868521001	Glipizide Tab SR 24HR 5 MG
54868521002	Glipizide Tab SR 24HR 5 MG
54868521003	Glipizide Tab SR 24HR 5 MG
54868524300	Glyburide-Metformin Tab 5-500 MG
54868524301	Glyburide-Metformin Tab 5-500 MG
54868524302	Glyburide-Metformin Tab 5-500 MG
54868524303	Glyburide-Metformin Tab 5-500 MG
54868524304	Glyburide-Metformin Tab 5-500 MG
54868524900	Rosiglitazone Maleate Tab 2 MG (Base Equiv)
54868524901	Rosiglitazone Maleate Tab 2 MG (Base Equiv)
54868526200	Rosiglitazone Maleate-Metformin HCl Tab 4-1000 MG
54868526201	Rosiglitazone Maleate-Metformin HCl Tab 4-1000 MG
54868528800	Glipizide-Metformin HCl Tab 5-500 MG
54868528801	Glipizide-Metformin HCl Tab 5-500 MG
54868528802	Glipizide-Metformin HCl Tab 5-500 MG
54868532700	Insulin Aspart Prot & Aspart Sus Pen-inj 100 Unit/ML (70-30)
54868536400	Glipizide Tab SR 24HR 2.5 MG
54868536401	Glipizide Tab SR 24HR 2.5 MG
54868536402	Glipizide Tab SR 24HR 2.5 MG
54868537600	Rosiglitazone Maleate-Metformin HCl Tab 2-1000 MG
54868537900	Rosiglitazone Maleate-Metformin HCl Tab 1-500 MG
54868538000	Nateglinide Tab 120 MG
54868538001	Nateglinide Tab 120 MG
54868538100	Repaglinide Tab 2 MG
54868538101	Repaglinide Tab 2 MG
54868538102	Repaglinide Tab 2 MG
54868538200	Pramlintide Acetate Inj 600 MCG/ML (Base Equiv)
54868538400	Exenatide Soln Pen-injector 5 MCG/0.02ML
54868538401	Exenatide Soln Pen-injector 10 MCG/0.04ML
54868539900	Glipizide-Metformin HCl Tab 2.5-500 MG
54868539901	Glipizide-Metformin HCl Tab 2.5-500 MG
54868545700	Glimepiride Tab 2 MG
54868545701	Glimepiride Tab 2 MG
54868545702	Glimepiride Tab 2 MG
54868546700	Glipizide-Metformin HCl Tab 5-500 MG
54868546701	Glipizide-Metformin HCl Tab 5-500 MG
54868546702	Glipizide-Metformin HCl Tab 5-500 MG
54868550000	Pioglitazone HCl-Metformin HCl Tab 15-500 MG
54868550001	Pioglitazone HCl-Metformin HCl Tab 15-500 MG
54868550002	Pioglitazone HCl-Metformin HCl Tab 15-500 MG
54868555300	Pioglitazone HCl-Metformin HCl Tab 15-850 MG
54868555301	Pioglitazone HCl-Metformin HCl Tab 15-850 MG
54868555302	Pioglitazone HCl-Metformin HCl Tab 15-850 MG
54868571200	Glyburide Micronized Tab 1.5 MG
54868573900	Rosiglitazone Maleate-Glimepiride Tab 4-4 MG
54868576500	Insulin Glargine Soln Cartridge 100 Unit/ML
54868582400	Insulin NPH Isophane & Regular Human Inj 100 Unit/ML (50-50)
54868583100	Acarbose Tab 25 MG
54868583101	Acarbose Tab 25 MG
54868583600	Insulin Lispro (Human) Soln Cartridge 100 Unit/ML
54868584000	Sitagliptin Phosphate Tab 100 MG (Base Equiv)
54868584001	Sitagliptin Phosphate Tab 100 MG (Base Equiv)
54868588300	Insulin Detemir Soln Pen-injector 100 Unit/ML
54868589900	Insulin Lispro (Human) Soln Pen-injector 100 Unit/ML
54868594500	Acarbose Tab 25 MG
54868597300	Sitagliptin-Metformin HCl Tab 50-500 MG
54868603100	Sitagliptin Phosphate Tab 50 MG (Base Equiv)
54868603101	Sitagliptin Phosphate Tab 50 MG (Base Equiv)
54868605400	Insulin Aspart Soln Pen-injector 100 Unit/ML
54868623100	Insulin Glargine Soln Pen-Injector 100 Unit/ML
54868630900	Saxagliptin HCl Tab 5 MG (Base Equiv)
54868643200	Sitagliptin-Metformin HCl Tab SR 24HR 50-1000 MG
54868643800	Pioglitazone HCl Tab 15 MG (Base Equiv)
55045121101	Chlorpropamide Tab 250 MG
55045205801	Glipizide Tab 5 MG
55045213800	Glyburide Tab 5 MG
55045213801	Glyburide Tab 5 MG
55045213808	Glyburide Tab 5 MG
55045226501	Glipizide Tab 5 MG
55045226508	Glipizide Tab 5 MG
55045226601	Glipizide Tab 10 MG
55045232201	Glyburide Tab 5 MG
55045330001	Glipizide Tab SR 24HR 10 MG
55045343408	Glipizide Tab SR 24HR 2.5 MG
55045350601	Insulin Regular (Human) Inj 100 Unit/ML
55045350801	Insulin NPH Isophane & Regular Human Inj 100 Unit/ML (70-30)
55045360201	Insulin Lispro (Human) Inj 100 Unit/ML
55045362401	Insulin NPH Isophane & Regular Human Inj 100 Unit/ML (70-30)
55045368501	Insulin Glargine Inj 100 Unit/ML
55048024130	Glimepiride Tab 2 MG
55048024230	Glimepiride Tab 1 MG
55048024330	Glimepiride Tab 4 MG
55048024360	Glimepiride Tab 4 MG
55048024430	Glipizide Tab 5 MG
55048024530	Glipizide Tab SR 24HR 10 MG
55048024560	Glipizide Tab SR 24HR 10 MG
55048024630	Glipizide-Metformin HCl Tab 2.5-500 MG
55048024730	Glipizide-Metformin HCl Tab 5-500 MG
55048024830	Glyburide Tab 5 MG
55048024890	Glyburide Tab 5 MG
55048026930	Glyburide Tab 2.5 MG
55048027030	Glipizide Tab 10 MG
55048027360	Glyburide-Metformin Tab 5-500 MG
55048027371	Glyburide-Metformin Tab 5-500 MG
55048028860	Glimepiride Tab 2 MG
55048028960	Glimepiride Tab 4 MG
55048043460	Sitagliptin-Metformin HCl Tab 50-1000 MG
55048043760	Sitagliptin-Metformin HCl Tab 50-500 MG
55048058330	Pioglitazone HCl Tab 15 MG (Base Equiv)
55048058430	Pioglitazone HCl Tab 30 MG (Base Equiv)
55048058530	Pioglitazone HCl Tab 45 MG (Base Equiv)
55048076460	Rosiglitazone Maleate Tab 2 MG (Base Equiv)
55048076530	Rosiglitazone Maleate Tab 4 MG (Base Equiv)
55048076630	Rosiglitazone Maleate Tab 8 MG (Base Equiv)
55048077730	Sitagliptin Phosphate Tab 100 MG (Base Equiv)
55111032001	Glimepiride Tab 1 MG
55111032005	Glimepiride Tab 1 MG
55111032101	Glimepiride Tab 2 MG
55111032105	Glimepiride Tab 2 MG
55111032201	Glimepiride Tab 4 MG
55111032205	Glimepiride Tab 4 MG
55111032890	Nateglinide Tab 60 MG
55111032990	Nateglinide Tab 120 MG
55111069501	Glyburide-Metformin Tab 1.25-250 MG
55111069601	Glyburide-Metformin Tab 2.5-500 MG
55111069610	Glyburide-Metformin Tab 2.5-500 MG
55111069701	Glyburide-Metformin Tab 5-500 MG
55111069710	Glyburide-Metformin Tab 5-500 MG
55289006690	Chlorpropamide Tab 250 MG
55289006697	Chlorpropamide Tab 250 MG
55289012530	Glipizide Tab 10 MG
55289017142	Acarbose Tab 50 MG
55289017330	Glyburide Tab 5 MG
55289018797	Tolazamide Tab 500 MG
55289026590	Tolazamide Tab 250 MG
55289028130	Glyburide-Metformin Tab 5-500 MG
55289028160	Glyburide-Metformin Tab 5-500 MG
55289028186	Glyburide-Metformin Tab 5-500 MG
55289028190	Glyburide-Metformin Tab 5-500 MG
55289028997	Tolazamide Tab 100 MG
55289030190	Glipizide Tab SR 24HR 10 MG
55289030193	Glipizide Tab SR 24HR 10 MG
55289042430	Glipizide Tab 5 MG
55289042497	Glipizide Tab 5 MG
55289054030	Pioglitazone HCl Tab 45 MG (Base Equiv)
55289060630	Glyburide Tab 2.5 MG
55289060690	Glyburide Tab 2.5 MG
55289061401	Glyburide Tab 5 MG
55289061460	Glyburide Tab 5 MG
55289077907	Glipizide Tab SR 24HR 5 MG
55289080614	Glipizide Tab 5 MG
55289080630	Glipizide Tab 5 MG
55289080660	Glipizide Tab 5 MG
55289080686	Glipizide Tab 5 MG
55289080690	Glipizide Tab 5 MG
55289080693	Glipizide Tab 5 MG
55289086215	Pioglitazone HCl Tab 30 MG (Base Equiv)
55289086230	Pioglitazone HCl Tab 30 MG (Base Equiv)
55289089201	Glyburide Tab 5 MG
55289089214	Glyburide Tab 5 MG
55289089215	Glyburide Tab 5 MG
55289089230	Glyburide Tab 5 MG
55289089260	Glyburide Tab 5 MG
55289089286	Glyburide Tab 5 MG
55289089290	Glyburide Tab 5 MG
55289089293	Glyburide Tab 5 MG
55289089297	Glyburide Tab 5 MG
55289089298	Glyburide Tab 5 MG
55289093830	Rosiglitazone Maleate Tab 8 MG (Base Equiv)
55289097601	Glipizide Tab 10 MG
55289097614	Glipizide Tab 10 MG
55289097630	Glipizide Tab 10 MG
55289097660	Glipizide Tab 10 MG
55289097690	Glipizide Tab 10 MG
55289097693	Glipizide Tab 10 MG
55370014607	Glyburide Micronized Tab 1.5 MG
55370014608	Glyburide Micronized Tab 1.5 MG
55370014609	Glyburide Micronized Tab 1.5 MG
55370014707	Glyburide Micronized Tab 3 MG
55370014708	Glyburide Micronized Tab 3 MG
55370014709	Glyburide Micronized Tab 3 MG
55370050607	Glyburide Micronized Tab 6 MG
55370050608	Glyburide Micronized Tab 6 MG
55370050609	Glyburide Micronized Tab 6 MG
55700002230	Glipizide Tab SR 24HR 5 MG
55700025630	Glimepiride Tab 4 MG
55700025660	Glimepiride Tab 4 MG
55700025690	Glimepiride Tab 4 MG
55700039530	Glyburide-Metformin Tab 2.5-500 MG
55700039560	Glyburide-Metformin Tab 2.5-500 MG
55700039590	Glyburide-Metformin Tab 2.5-500 MG
55887017930	Glipizide Tab SR 24HR 10 MG
55887021230	Glipizide Tab SR 24HR 5 MG
55887021260	Glipizide Tab SR 24HR 5 MG
55887022230	Glimepiride Tab 2 MG
55887022260	Glimepiride Tab 2 MG
55887022290	Glimepiride Tab 2 MG
55887033930	Glyburide Micronized Tab 3 MG
55887033960	Glyburide Micronized Tab 3 MG
55887033990	Glyburide Micronized Tab 3 MG
55887036830	Glyburide-Metformin Tab 5-500 MG
55887036860	Glyburide-Metformin Tab 5-500 MG
55887036890	Glyburide-Metformin Tab 5-500 MG
55887053530	Glyburide Tab 2.5 MG
55887053560	Glyburide Tab 2.5 MG
55887053590	Glyburide Tab 2.5 MG
55887053630	Glyburide Tab 5 MG
55887053660	Glyburide Tab 5 MG
55887053690	Glyburide Tab 5 MG
55887069330	Glipizide Tab 10 MG
55887069360	Glipizide Tab 10 MG
55887069390	Glipizide Tab 10 MG
55887072730	Glipizide Tab 5 MG
55887072760	Glipizide Tab 5 MG
55887072790	Glipizide Tab 5 MG
55887096530	Glyburide Tab 1.25 MG
55887096830	Glipizide Tab SR 24HR 10 MG
55887096930	Glipizide Tab SR 24HR 5 MG
57237002001	Glyburide Tab 1.25 MG
57237002101	Glyburide Tab 2.5 MG
57237002105	Glyburide Tab 2.5 MG
57237002199	Glyburide Tab 2.5 MG
57237002201	Glyburide Tab 5 MG
57237002205	Glyburide Tab 5 MG
57237002299	Glyburide Tab 5 MG
57237002301	Glyburide-Metformin Tab 1.25-250 MG
57237002305	Glyburide-Metformin Tab 1.25-250 MG
57237002401	Glyburide-Metformin Tab 2.5-500 MG
57237002405	Glyburide-Metformin Tab 2.5-500 MG
57237002501	Glyburide-Metformin Tab 5-500 MG
57237002505	Glyburide-Metformin Tab 5-500 MG
57237015701	Repaglinide Tab 0.5 MG
57237015801	Repaglinide Tab 1 MG
57237015901	Repaglinide Tab 2 MG
57664039813	Glipizide Tab 5 MG
57664039818	Glipizide Tab 5 MG
57664039888	Glipizide Tab 5 MG
57664039913	Glipizide Tab 10 MG
57664039918	Glipizide Tab 10 MG
57664039988	Glipizide Tab 10 MG
57664068488	Miglitol Tab 25 MG
57664068588	Miglitol Tab 50 MG
57664068688	Miglitol Tab 100 MG
57664072488	Glipizide-Metformin HCl Tab 5-500 MG
57664072588	Glipizide-Metformin HCl Tab 2.5-500 MG
57664072788	Glipizide-Metformin HCl Tab 2.5-250 MG
57664074513	Repaglinide Tab 1 MG
57664074588	Repaglinide Tab 1 MG
57664074713	Repaglinide Tab 2 MG
57664074788	Repaglinide Tab 2 MG
57866006908	Rosiglitazone Maleate Tab 4 MG (Base Equiv)
57866006909	Rosiglitazone Maleate Tab 4 MG (Base Equiv)
57866023601	Glipizide Tab 5 MG
57866023701	Glyburide Tab 2.5 MG
57866126402	Rosiglitazone Maleate Tab 4 MG (Base Equiv)
57866136403	Rosiglitazone Maleate Tab 8 MG (Base Equiv)
57866630201	Glipizide Tab SR 24HR 5 MG
57866640901	Glyburide Tab 5 MG
57866640902	Glyburide Tab 5 MG
57866640903	Glyburide Tab 5 MG
57866640904	Glyburide Tab 5 MG
57866640905	Glyburide Tab 5 MG
57866640906	Glyburide Tab 5 MG
57866646201	Glipizide Tab 10 MG
57866646202	Glipizide Tab 10 MG
57866646301	Glipizide Tab 5 MG
57866646302	Glipizide Tab 5 MG
57866707301	Glimepiride Tab 2 MG
57866707302	Glimepiride Tab 2 MG
57866707401	Glimepiride Tab 4 MG
57866707402	Glimepiride Tab 4 MG
57866799101	Glyburide-Metformin Tab 5-500 MG
58016000500	Glimepiride Tab 2 MG
58016000530	Glimepiride Tab 2 MG
58016000560	Glimepiride Tab 2 MG
58016000590	Glimepiride Tab 2 MG
58016005800	Glyburide-Metformin Tab 1.25-250 MG
58016005830	Glyburide-Metformin Tab 1.25-250 MG
58016005860	Glyburide-Metformin Tab 1.25-250 MG
58016005890	Glyburide-Metformin Tab 1.25-250 MG
58016008100	Rosiglitazone Maleate Tab 8 MG (Base Equiv)
58016008130	Rosiglitazone Maleate Tab 8 MG (Base Equiv)
58016008160	Rosiglitazone Maleate Tab 8 MG (Base Equiv)
58016008190	Rosiglitazone Maleate Tab 8 MG (Base Equiv)
58016008200	Rosiglitazone Maleate Tab 2 MG (Base Equiv)
58016008230	Rosiglitazone Maleate Tab 2 MG (Base Equiv)
58016008260	Rosiglitazone Maleate Tab 2 MG (Base Equiv)
58016008290	Rosiglitazone Maleate Tab 2 MG (Base Equiv)
58016033400	Glipizide Tab SR 24HR 5 MG
58016033402	Glipizide Tab SR 24HR 5 MG
58016033430	Glipizide Tab SR 24HR 5 MG
58016033460	Glipizide Tab SR 24HR 5 MG
58016033490	Glipizide Tab SR 24HR 5 MG
58016037030	Tolazamide Tab 250 MG
58016037600	Glipizide Tab 10 MG
58016037602	Glipizide Tab 10 MG
58016037630	Glipizide Tab 10 MG
58016037660	Glipizide Tab 10 MG
58016037690	Glipizide Tab 10 MG
58016037699	Glipizide Tab 10 MG
58016037800	Glyburide Tab 5 MG
58016037802	Glyburide Tab 5 MG
58016037830	Glyburide Tab 5 MG
58016037860	Glyburide Tab 5 MG
58016037890	Glyburide Tab 5 MG
58016037899	Glyburide Tab 5 MG
58016041100	Glyburide-Metformin Tab 5-500 MG
58016041102	Glyburide-Metformin Tab 5-500 MG
58016041130	Glyburide-Metformin Tab 5-500 MG
58016041160	Glyburide-Metformin Tab 5-500 MG
58016041190	Glyburide-Metformin Tab 5-500 MG
58016046700	Glimepiride Tab 4 MG
58016046730	Glimepiride Tab 4 MG
58016046760	Glimepiride Tab 4 MG
58016046790	Glimepiride Tab 4 MG
58016069100	Glipizide Tab SR 24HR 10 MG
58016069130	Glipizide Tab SR 24HR 10 MG
58016069160	Glipizide Tab SR 24HR 10 MG
58016069190	Glipizide Tab SR 24HR 10 MG
58016084400	Glimepiride Tab 4 MG
58016084430	Glimepiride Tab 4 MG
58016084460	Glimepiride Tab 4 MG
58016084490	Glimepiride Tab 4 MG
58016087600	Glipizide Tab 5 MG
58016087610	Glipizide Tab 5 MG
58016087612	Glipizide Tab 5 MG
58016087614	Glipizide Tab 5 MG
58016087615	Glipizide Tab 5 MG
58016087620	Glipizide Tab 5 MG
58016087621	Glipizide Tab 5 MG
58016087624	Glipizide Tab 5 MG
58016087628	Glipizide Tab 5 MG
58016087630	Glipizide Tab 5 MG
58016087640	Glipizide Tab 5 MG
58016087650	Glipizide Tab 5 MG
58016087660	Glipizide Tab 5 MG
58016478801	Insulin NPH (Human) (Isophane) Inj 100 Unit/ML
58118032103	Glimepiride Tab 2 MG
58118032106	Glimepiride Tab 2 MG
58118032203	Glimepiride Tab 4 MG
58118032206	Glimepiride Tab 4 MG
58118046106	Glipizide Tab 10 MG
58118046108	Glipizide Tab 10 MG
58118046109	Glipizide Tab 10 MG
58118145203	Glipizide Tab 5 MG
58118145206	Glipizide Tab 5 MG
58118145209	Glipizide Tab 5 MG
58118233103	Glyburide-Metformin Tab 2.5-500 MG
58118233109	Glyburide-Metformin Tab 2.5-500 MG
58118233203	Glyburide-Metformin Tab 5-500 MG
58118233209	Glyburide-Metformin Tab 5-500 MG
58118542001	Pioglitazone HCl Tab 15 MG (Base Equiv)
58118542003	Pioglitazone HCl Tab 15 MG (Base Equiv)
58118542006	Pioglitazone HCl Tab 15 MG (Base Equiv)
58118542009	Pioglitazone HCl Tab 15 MG (Base Equiv)
58118834308	Glyburide Tab 2.5 MG
58118834309	Glyburide Tab 2.5 MG
58864002714	Glipizide Tab 5 MG
58864002730	Glipizide Tab 5 MG
58864002760	Glipizide Tab 5 MG
58864002790	Glipizide Tab 5 MG
58864010030	Chlorpropamide Tab 100 MG
58864016130	Glipizide Tab 10 MG
58864016160	Glipizide Tab 10 MG
58864021430	Glyburide Tab 5 MG
58864021460	Glyburide Tab 5 MG
58864022430	Glyburide Tab 5 MG
58864022460	Glyburide Tab 5 MG
58864022493	Glyburide Tab 5 MG
58864067014	Pioglitazone HCl Tab 15 MG (Base Equiv)
58864067030	Pioglitazone HCl Tab 15 MG (Base Equiv)
58864068730	Rosiglitazone Maleate Tab 4 MG (Base Equiv)
58864068760	Rosiglitazone Maleate Tab 4 MG (Base Equiv)
58864068930	Glipizide Tab SR 24HR 10 MG
58864068960	Glipizide Tab SR 24HR 10 MG
58864070530	Glipizide Tab SR 24HR 5 MG
58864071130	Glyburide-Metformin Tab 2.5-500 MG
58864074515	Pioglitazone HCl Tab 30 MG (Base Equiv)
58864074530	Pioglitazone HCl Tab 30 MG (Base Equiv)
58864082760	Rosiglitazone Maleate Tab 4 MG (Base Equiv)
58864085830	Glipizide Tab SR 24HR 2.5 MG
58864095230	Glyburide-Metformin Tab 2.5-500 MG
58864095330	Glyburide-Metformin Tab 5-500 MG
58864095630	Glipizide Tab SR 24HR 10 MG
58864095730	Glipizide Tab SR 24HR 5 MG
[truncated: 709 more rows]

## Sheet: Immunosup Meds
Immunosuppressive Medications
An individual was considered to have taken immunosuppressive medications if he/she had claims
containing one or more of the following HCPCS codes or NDC codes for services
occurring on or prescriptions filled on at least two different dates.
HCPCS Codes
J0129	INJECTION, ABATACEPT, 10 MG
J0135	INJECTION, ADALIMUMAB, 20 MG
J0480	INJECTION, BASILIXIMAB, 20 MG
J1438	INJECTION, ETANERCEPT, 25 MG (CODE MAY BE USED FOR MEDICARE WHEN DRUG ADMINISTERED UNDER THE DIRECT SUPERVISION OF A PHYSICIAN, NOT FOR USE WHEN DRUG IS SELF ADMINISTERED)
J1745	INJECTION INFLIXIMAB, 10 MG
J2323	INJECTION, NATALIZUMAB, 1 MG
J3590	UNCLASSIFIED BIOLOGICS
J7500	AZATHIOPRINE, ORAL, 50MG
J7500	AZATHIOPRINE, ORAL, 50 MG
J7501	AZATHIOPRINE, PARENTERAL, 100 MG
J7502	CYCLOSPORINE, ORAL, 100 MG
J7504	LYMPHOCYTE IMMUNE GLOBULIN, ANTITHYMOCYTE GLOBULIN, EQUINE, PARENTERAL, 250 MG
J7505	MUROMONAB-CD3, PARENTERAL, 5 MG
J7507	TACROLIMUS, ORAL, PER 1 MG
J7507	TACROLIMUS, IMMEDIATE RELEASE, ORAL, 1 MG
J7508	TACROLIMUS, EXTENDED RELEASE, ORAL, 0.1 MG
J7508	TACROLIMUS, ORAL, PER 5 MG
J7511	LYMPHOCYTE IMMUNE GLOBULIN, ANTITHYMOCYTE GLOBULIN, RABBIT, PARENTERAL, 25MG
J7513	DACLIZUMAB, PARENTERAL, 25 MG
J7515	CYCLOSPORINE, ORAL, 25 MG
J7516	CYCLOSPORIN, PARENTERAL, 250 MG
J7517	MYCOPHENOLATE MOFETIL, ORAL, 250 MG
J7517	MYCOPHENOLATE MOFETIL , ORAL, 250 MG
J7517	MYCOPHENOLATE MOFETIL, ORAL, 250 MG,
J7518	MYCOPHENOLIC ACID, ORAL, 180 MG
J7520	SIROLIMUS, ORAL, 1 MG
J7525	TACROLIMUS, PARENTERAL, 5 MG
J7527	EVEROLIMUS, ORAL, 0.25 MG
J7599	IMMUNOSUPPRESSIVE DRUG, NOT OTHERWISE CLASSIFIED
J8561	EVEROLIMUS, ORAL, 0.25 MG
J8610	METHOTREXATE; ORAL, 2.5 MG
J8999	PRESCRIPTION DRUG, ORAL, CHEMOTHERAPEUTIC, NOS
J9070	CYCLOPHOSPHAMIDE, 100 MG
J9090	CYCLOPHOSPHAMIDE, 500 MG
J9091	CYCLOPHOSPHAMIDE, 1.0 GRAM
J9092	CYCLOPHOSPHAMIDE, 2.0 GRAM
J9093	CYCLOPHOSPHAMIDE, LYOPHILIZED, 100 MG
J9094	CYCLOPHOSPHAMIDE, LYOPHILIZED, 200 MG
J9095	CYCLOPHOSPHAMIDE, LYOPHILIZED, 500 MG
J9096	CYCLOPHOSPHAMIDE, LYOPHILIZED, 1.0 GRAM
J9097	CYCLOPHOSPHAMIDE, LYOPHILIZED, 2.0 GRAM
J9208	INJECTION, IFOSFAMIDE, 1 GRAM
J9230	INJECTION, MECHLORETHAMINE HYDROCHLORIDE, (NITROGEN MUSTARD), 10 MG
J9245	INJECTION, MELPHALAN HYDROCHLORIDE, 50 MG
J9250	METHOTREXATE SODIUM, 5 MG
J9260	METHOTREXATE SODIUM, 50 MG
J9310	INJECTION, RITUXIMAB, 100 MG
Q2019	INJECTION, BASILIXIMAB, 20 MG
Q4079	INJECTION, NATALIZUMAB, 1 MG
National Drug Codes
00003037113	BELATACEPT FOR IV INFUSION 250 MG
00003218710	ABATACEPT FOR IV SOLN 250 MG
00003218811	ABATACEPT SUBCUTANEOUS SOLN PREFILLED SYRINGE 125 MG/ML
00003218831	ABATACEPT SUBCUTANEOUS SOLN PREFILLED SYRINGE 125 MG/ML
00003218851	ABATACEPT SUBCUTANEOUS SOLN AUTO-INJECTOR 125 MG/ML
00004025901	MYCOPHENOLATE MOFETIL CAP 250 MG
00004025905	MYCOPHENOLATE MOFETIL CAP 250 MG
00004025943	MYCOPHENOLATE MOFETIL CAP 250 MG
00004026001	MYCOPHENOLATE MOFETIL TAB 500 MG
00004026043	MYCOPHENOLATE MOFETIL TAB 500 MG
00004026129	MYCOPHENOLATE MOFETIL FOR ORAL SUSP 200 MG/ML
00004029809	MYCOPHENOLATE MOFETIL HCL FOR IV SOLN 500 MG (BASE EQUIV)
00004050109	DACLIZUMAB FOR IV INJ CONC 25 MG/5ML
00005450704	METHOTREXATE SODIUM TAB 2.5 MG (ANTIRHEUMATIC)
00005450705	METHOTREXATE SODIUM TAB 2.5 MG (ANTIRHEUMATIC)
00005450707	METHOTREXATE SODIUM TAB 2.5 MG (ANTIRHEUMATIC)
00005450709	METHOTREXATE SODIUM TAB 2.5 MG (ANTIRHEUMATIC)
00005450723	METHOTREXATE SODIUM TAB 2.5 MG (BASE EQUIV)
00005450791	METHOTREXATE SODIUM TAB 2.5 MG (ANTIRHEUMATIC)
00006775331	MECHLORETHAMINE HCL FOR INJ 10 MG
00008103004	SIROLIMUS ORAL SOLN 1 MG/ML
00008103006	SIROLIMUS ORAL SOLN 1 MG/ML
00008103105	SIROLIMUS TAB 1 MG
00008103110	SIROLIMUS TAB 1 MG
00008103205	SIROLIMUS TAB 2 MG
00008104005	SIROLIMUS TAB 0.5 MG
00008104010	SIROLIMUS TAB 0.5 MG
00008104105	SIROLIMUS TAB 1 MG
00008104110	SIROLIMUS TAB 1 MG
00008104205	SIROLIMUS TAB 2 MG
00009722401	LYMPHOCYTE IMMUNE GLOBULIN ANTI-THYMOCYTE G INJ 50 MG/ML(EQ)
00009722402	LYMPHOCYTE IMMUNE GLOBULIN ANTI-THYMOCYTE G INJ 50 MG/ML(EQ)
00013560601	CYCLOPHOSPHAMIDE LYOPHILIZED FOR INJ 100 MG
00013560693	CYCLOPHOSPHAMIDE LYOPHILIZED FOR INJ 100 MG
00013561601	CYCLOPHOSPHAMIDE LYOPHILIZED FOR INJ 200 MG
00013561693	CYCLOPHOSPHAMIDE LYOPHILIZED FOR INJ 200 MG
00013562601	CYCLOPHOSPHAMIDE LYOPHILIZED FOR INJ 500 MG
00013562693	CYCLOPHOSPHAMIDE LYOPHILIZED FOR INJ 500 MG
00013563601	CYCLOPHOSPHAMIDE LYOPHILIZED FOR INJ 1 GM
00013563670	CYCLOPHOSPHAMIDE LYOPHILIZED FOR INJ 1 GM
00013564601	CYCLOPHOSPHAMIDE LYOPHILIZED FOR INJ 2 GM
00013564670	CYCLOPHOSPHAMIDE LYOPHILIZED FOR INJ 2 GM
00015050241	CYCLOPHOSPHAMIDE FOR INJ 500 MG
00015050301	CYCLOPHOSPHAMIDE TAB 50 MG
00015050302	CYCLOPHOSPHAMIDE TAB 50 MG
00015050401	CYCLOPHOSPHAMIDE TAB 25 MG
00015050541	CYCLOPHOSPHAMIDE FOR INJ 1 GM
00015050641	CYCLOPHOSPHAMIDE FOR INJ 2 GM
00015053941	CYCLOPHOSPHAMIDE LYOPHILIZED FOR INJ 100 MG
00015054641	CYCLOPHOSPHAMIDE LYOPHILIZED FOR INJ 200 MG
00015054712	CYCLOPHOSPHAMIDE LYOPHILIZED FOR INJ 500 MG
00015054741	CYCLOPHOSPHAMIDE LYOPHILIZED FOR INJ 500 MG
00015054812	CYCLOPHOSPHAMIDE LYOPHILIZED FOR INJ 1 GM
00015054841	CYCLOPHOSPHAMIDE LYOPHILIZED FOR INJ 1 GM
00015054912	CYCLOPHOSPHAMIDE LYOPHILIZED FOR INJ 2 GM
00015054941	CYCLOPHOSPHAMIDE LYOPHILIZED FOR INJ 2 GM
00015055605	IFOSFAMIDE FOR INJ 1 GM
00015055611	IFOSFAMIDE FOR INJ 1 GM
00015055711	IFOSFAMIDE FOR INJ 3 GM
00015055741	IFOSFAMIDE FOR INJ 3 GM
00054016325	MYCOPHENOLATE MOFETIL CAP 250 MG
00054016329	MYCOPHENOLATE MOFETIL CAP 250 MG
00054016625	MYCOPHENOLATE MOFETIL TAB 500 MG
00054016629	MYCOPHENOLATE MOFETIL TAB 500 MG
00054038225	CYCLOPHOSPHAMIDE CAP 25 MG
00054038325	CYCLOPHOSPHAMIDE CAP 50 MG
00054408425	AZATHIOPRINE TAB 50 MG
00054412925	CYCLOPHOSPHAMIDE TAB 25 MG
00054413025	CYCLOPHOSPHAMIDE TAB 50 MG
00054455015	METHOTREXATE SODIUM TAB 2.5 MG (BASE EQUIV)
00054455025	METHOTREXATE SODIUM TAB 2.5 MG (BASE EQUIV)
00054458111	MERCAPTOPURINE TAB 50 MG
00054458127	MERCAPTOPURINE TAB 50 MG
00054808425	AZATHIOPRINE TAB 50 MG
00054808925	CYCLOPHOSPHAMIDE TAB 25 MG
00054813025	CYCLOPHOSPHAMIDE TAB 50 MG
00054855003	METHOTREXATE SODIUM TAB 2.5 MG (ANTIRHEUMATIC)
00054855005	METHOTREXATE SODIUM TAB 2.5 MG (ANTIRHEUMATIC)
00054855006	METHOTREXATE SODIUM TAB 2.5 MG (ANTIRHEUMATIC)
00054855007	METHOTREXATE SODIUM TAB 2.5 MG (ANTIRHEUMATIC)
00054855010	METHOTREXATE SODIUM TAB 2.5 MG (ANTIRHEUMATIC)
00054855025	METHOTREXATE SODIUM TAB 2.5 MG (BASE EQUIV)
00069014601	METHOTREXATE SODIUM INJ PF 50 MG/2ML (25 MG/ML)
00069014602	METHOTREXATE SODIUM INJ PF 50 MG/2ML (25 MG/ML)
00069014701	METHOTREXATE SODIUM INJ PF 100 MG/4ML (25 MG/ML)
00069014702	METHOTREXATE SODIUM INJ PF 100 MG/4ML (25 MG/ML)
00069014801	METHOTREXATE SODIUM INJ PF 250 MG/10ML (25 MG/ML)
00069014901	METHOTREXATE SODIUM INJ PF 1000 MG/40ML (25 MG/ML)
00069018101	METHOTREXATE SODIUM INJ PF 200 MG/8ML (25 MG/ML)
00069018102	METHOTREXATE SODIUM INJ PF 200 MG/8ML (25 MG/ML)
00069020401	METHOTREXATE SODIUM INJ PF 200 MG/8ML (25 MG/ML)
00069020410	METHOTREXATE SODIUM INJ PF 200 MG/8ML (25 MG/ML)
00069449522	IFOSFAMIDE IV INJ 1 GM/20ML (50 MG/ML)
00069449622	IFOSFAMIDE IV INJ 3 GM/60ML (50 MG/ML)
00074054130	CYCLOSPORINE MODIFIED CAP 50 MG
00074310832	CYCLOSPORINE MODIFIED CAP 25 MG
00074310932	CYCLOSPORINE MODIFIED CAP 100 MG
00074379902	ADALIMUMAB PREFILLED SYRINGE KIT 40 MG/0.8ML
00074379903	ADALIMUMAB PREFILLED SYRINGE KIT 40 MG/0.8ML
00074379906	ADALIMUMAB PREFILLED SYRINGE KIT 40 MG/0.8ML
00074433902	ADALIMUMAB PEN-INJECTOR KIT 40 MG/0.8ML
00074433906	ADALIMUMAB PEN-INJECTOR KIT 40 MG/0.8ML
00074433907	ADALIMUMAB PEN-INJECTOR KIT 40 MG/0.8ML
00074634702	ADALIMUMAB PREFILLED SYRINGE KIT 10 MG/0.2ML
00074646332	CYCLOSPORINE MODIFIED CAP 25 MG
00074647932	CYCLOSPORINE MODIFIED CAP 100 MG
00074726950	CYCLOSPORINE MODIFIED ORAL SOLN 100 MG/ML
00074937402	ADALIMUMAB PREFILLED SYRINGE KIT 20 MG/0.4ML
00078010901	CYCLOSPORINE IV SOLN 50 MG/ML
00078010961	CYCLOSPORINE IV SOLN 50 MG/ML
00078011022	CYCLOSPORINE ORAL SOLN 100 MG/ML
00078024015	CYCLOSPORINE CAP 25 MG
00078024061	CYCLOSPORINE CAP 25 MG
00078024115	CYCLOSPORINE CAP 100 MG
00078024161	CYCLOSPORINE CAP 100 MG
00078024615	CYCLOSPORINE MODIFIED CAP 25 MG
00078024661	CYCLOSPORINE MODIFIED CAP 25 MG
00078024815	CYCLOSPORINE MODIFIED CAP 100 MG
00078024861	CYCLOSPORINE MODIFIED CAP 100 MG
00078027422	CYCLOSPORINE MODIFIED ORAL SOLN 100 MG/ML
00078033184	BASILIXIMAB FOR IV SOLN 20 MG
00078038566	MYCOPHENOLATE SODIUM TAB DR 180 MG (MYCOPHENOLIC ACID EQUIV)
00078038666	MYCOPHENOLATE SODIUM TAB DR 360 MG (MYCOPHENOLIC ACID EQUIV)
00078039361	BASILIXIMAB FOR IV SOLN 10 MG
00078041420	EVEROLIMUS TAB 0.5 MG
00078041461	EVEROLIMUS TAB 0.5 MG
00078041520	EVEROLIMUS TAB 0.75 MG
00078041561	EVEROLIMUS TAB 0.75 MG
00078041720	EVEROLIMUS TAB 0.25 MG
00078041761	EVEROLIMUS TAB 0.25 MG
00078061605	TACROLIMUS CAP 0.5 MG
00078061705	TACROLIMUS CAP 1 MG
00078061805	TACROLIMUS CAP 5 MG
00088216030	LEFLUNOMIDE TAB 10 MG
00088216130	LEFLUNOMIDE TAB 20 MG
00088216203	LEFLUNOMIDE TAB 100 MG
00093017356	LEFLUNOMIDE TAB 10 MG
00093017456	LEFLUNOMIDE TAB 20 MG
00093551006	MERCAPTOPURINE TAB 50 MG
00093574019	CYCLOSPORINE MODIFIED CAP 25 MG
00093574065	CYCLOSPORINE MODIFIED CAP 25 MG
00093574165	CYCLOSPORINE MODIFIED CAP 50 MG
00093574265	CYCLOSPORINE MODIFIED CAP 100 MG
00093733401	MYCOPHENOLATE MOFETIL CAP 250 MG
00093733405	MYCOPHENOLATE MOFETIL CAP 250 MG
00093733419	MYCOPHENOLATE MOFETIL CAP 250 MG
00093733493	MYCOPHENOLATE MOFETIL CAP 250 MG
00093747701	MYCOPHENOLATE MOFETIL TAB 500 MG
00093747705	MYCOPHENOLATE MOFETIL TAB 500 MG
00143956601	AZATHIOPRINE SODIUM FOR INJ 100 MG
00172731000	CYCLOSPORINE MODIFIED CAP 25 MG
00172731046	CYCLOSPORINE MODIFIED CAP 25 MG
00172731100	CYCLOSPORINE MODIFIED CAP 50 MG
00172731146	CYCLOSPORINE MODIFIED CAP 50 MG
00172731200	CYCLOSPORINE MODIFIED CAP 100 MG
00172731246	CYCLOSPORINE MODIFIED CAP 100 MG
00172731320	CYCLOSPORINE MODIFIED ORAL SOLN 100 MG/ML
00173004535	MELPHALAN TAB 2 MG
00173013093	MELPHALAN HCL FOR INJ 50 MG (BASE EQUIV)
00173059755	AZATHIOPRINE TAB 50 MG
00173063535	CHLORAMBUCIL TAB 2 MG
00173080725	MERCAPTOPURINE TAB 50 MG
00173080765	MERCAPTOPURINE TAB 50 MG
00185093230	CYCLOSPORINE MODIFIED CAP 25 MG
00185093330	CYCLOSPORINE MODIFIED CAP 100 MG
00338399101	IFOSFAMIDE FOR INJ 1 GM
00338399301	IFOSFAMIDE FOR INJ 3 GM
00378001401	METHOTREXATE SODIUM TAB 2.5 MG (BASE EQUIV)
00378001450	METHOTREXATE SODIUM TAB 2.5 MG (BASE EQUIV)
00378100501	AZATHIOPRINE TAB 50 MG
00378204501	TACROLIMUS CAP 0.5 MG
00378204505	TACROLIMUS CAP 0.5 MG
00378204601	TACROLIMUS CAP 1 MG
00378204605	TACROLIMUS CAP 1 MG
00378204701	TACROLIMUS CAP 5 MG
00378204705	TACROLIMUS CAP 5 MG
00378225001	MYCOPHENOLATE MOFETIL CAP 250 MG
00378225005	MYCOPHENOLATE MOFETIL CAP 250 MG
00378354725	MERCAPTOPURINE TAB 50 MG
00378354752	MERCAPTOPURINE TAB 50 MG
00378420178	MYCOPHENOLATE SODIUM TAB DR 180 MG (MYCOPHENOLIC ACID EQUIV)
00378420278	MYCOPHENOLATE SODIUM TAB DR 360 MG (MYCOPHENOLIC ACID EQUIV)
00378447201	MYCOPHENOLATE MOFETIL TAB 500 MG
00378447205	MYCOPHENOLATE MOFETIL TAB 500 MG
00406200301	AZATHIOPRINE TAB 50 MG
00469060767	TACROLIMUS CAP 0.5 MG
00469060773	TACROLIMUS CAP 0.5 MG
00469061710	TACROLIMUS CAP 1 MG
00469061711	TACROLIMUS CAP 1 MG
00469061771	TACROLIMUS CAP 1 MG
00469061773	TACROLIMUS CAP 1 MG
00469064773	TACROLIMUS CAP SR 24HR 0.5 MG
00469065710	TACROLIMUS CAP 5 MG
00469065711	TACROLIMUS CAP 5 MG
00469065771	TACROLIMUS CAP 5 MG
00469065773	TACROLIMUS CAP 5 MG
00469067773	TACROLIMUS CAP SR 24HR 1 MG
00469068773	TACROLIMUS CAP SR 24HR 5 MG
00469301601	TACROLIMUS INJ 5 MG/ML
00555035101	LEFLUNOMIDE TAB 10 MG
00555035201	LEFLUNOMIDE TAB 20 MG
00555057202	METHOTREXATE SODIUM TAB 2.5 MG (BASE EQUIV)
00555057235	METHOTREXATE SODIUM TAB 2.5 MG (BASE EQUIV)
00555057245	METHOTREXATE SODIUM TAB 2.5 MG (ANTIRHEUMATIC)
00555057246	METHOTREXATE SODIUM TAB 2.5 MG (ANTIRHEUMATIC)
00555057247	METHOTREXATE SODIUM TAB 2.5 MG (ANTIRHEUMATIC)
00555057248	METHOTREXATE SODIUM TAB 2.5 MG (ANTIRHEUMATIC)
00555057249	METHOTREXATE SODIUM TAB 2.5 MG (ANTIRHEUMATIC)
00555092701	METHOTREXATE SODIUM TAB 5 MG (BASE EQUIV)
00555092801	METHOTREXATE SODIUM TAB 7.5 MG (BASE EQUIV)
00555092901	METHOTREXATE SODIUM TAB 10 MG (BASE EQUIV)
00555094501	METHOTREXATE SODIUM TAB 15 MG (BASE EQUIV)
00574086610	CYCLOSPORINE IV SOLN 50 MG/ML
00591222215	CYCLOSPORINE MODIFIED CAP 25 MG
00591222315	CYCLOSPORINE MODIFIED CAP 100 MG
00591222455	CYCLOSPORINE MODIFIED ORAL SOLN 100 MG/ML
00591335901	TACROLIMUS CAP 5 MG
00703342711	IFOSFAMIDE IV INJ 1 GM/20ML (50 MG/ML)
00703342911	IFOSFAMIDE IV INJ 3 GM/60ML (50 MG/ML)
00703367101	METHOTREXATE SODIUM INJ PF 50 MG/2ML (25 MG/ML)
00703367103	METHOTREXATE SODIUM INJ PF 50 MG/2ML (25 MG/ML)
00703367191	METHOTREXATE SODIUM INJ PF 50 MG/2ML (25 MG/ML)
00703367193	METHOTREXATE SODIUM INJ PF 50 MG/2ML (25 MG/ML)
00703367301	METHOTREXATE SODIUM INJ PF 100 MG/4ML (25 MG/ML)
00703367501	METHOTREXATE SODIUM INJ PF 250 MG/10ML (25 MG/ML)
00703367591	METHOTREXATE SODIUM INJ PF 250 MG/10ML (25 MG/ML)
00703367801	METHOTREXATE SODIUM INJ PF 1000 MG/40ML (25 MG/ML)
00703367881	METHOTREXATE SODIUM INJ PF 1000 MG/40ML (25 MG/ML)
00781105901	AZATHIOPRINE TAB 50 MG
00781206701	MYCOPHENOLATE MOFETIL CAP 250 MG
00781206705	MYCOPHENOLATE MOFETIL CAP 250 MG
00781206789	MYCOPHENOLATE MOFETIL CAP 250 MG
00781210201	TACROLIMUS CAP 0.5 MG
00781210301	TACROLIMUS CAP 1 MG
00781210401	TACROLIMUS CAP 5 MG
00781323394	CYCLOPHOSPHAMIDE FOR INJ 500 MG
00781324494	CYCLOPHOSPHAMIDE FOR INJ 1 GM
00781325594	CYCLOPHOSPHAMIDE FOR INJ 2 GM
00781505631	LEFLUNOMIDE TAB 10 MG
00781505731	LEFLUNOMIDE TAB 20 MG
00781507501	AZATHIOPRINE TAB 50 MG
00781517501	MYCOPHENOLATE MOFETIL TAB 500 MG
00781517505	MYCOPHENOLATE MOFETIL TAB 500 MG
00781930201	TACROLIMUS CAP 0.5 MG
00781930301	TACROLIMUS CAP 1 MG
00781930401	TACROLIMUS CAP 5 MG
00904174960	METHOTREXATE SODIUM TAB 2.5 MG (BASE EQUIV)
00904601260	METHOTREXATE SODIUM TAB 2.5 MG (BASE EQUIV)
00904642561	TACROLIMUS CAP 1 MG
00955173530	LEFLUNOMIDE TAB 10 MG
00955173730	LEFLUNOMIDE TAB 20 MG
10019092501	IFOSFAMIDE FOR INJ 1 GM
10019092582	IFOSFAMIDE FOR INJ 1 GM
10019092602	IFOSFAMIDE FOR INJ 3 GM
10019092616	IFOSFAMIDE FOR INJ 3 GM
10019093501	CYCLOPHOSPHAMIDE FOR INJ 500 MG
10019093525	CYCLOPHOSPHAMIDE FOR INJ 500 MG
10019093601	CYCLOPHOSPHAMIDE FOR INJ 1 GM
10019093650	CYCLOPHOSPHAMIDE FOR INJ 1 GM
10019093701	CYCLOPHOSPHAMIDE FOR INJ 2 GM
10019093710	CYCLOPHOSPHAMIDE FOR INJ 2 GM
10019093801	CYCLOPHOSPHAMIDE FOR INJ 500 MG
10019093901	CYCLOPHOSPHAMIDE FOR INJ 1 GM
10019094001	METHOTREXATE SODIUM INJ 25 MG/ML
10019094002	METHOTREXATE SODIUM INJ 25 MG/ML
10019094101	METHOTREXATE SODIUM INJ 25 MG/ML
10019094201	CYCLOPHOSPHAMIDE FOR INJ 2 GM
10019094301	CYCLOPHOSPHAMIDE FOR INJ 500 MG
10019094325	CYCLOPHOSPHAMIDE FOR INJ 500 MG
10019094401	CYCLOPHOSPHAMIDE FOR INJ 1 GM
10019094450	CYCLOPHOSPHAMIDE FOR INJ 1 GM
10019094501	CYCLOPHOSPHAMIDE FOR INJ 2 GM
10019094510	CYCLOPHOSPHAMIDE FOR INJ 2 GM
10019095501	CYCLOPHOSPHAMIDE FOR INJ 500 MG
10019095550	CYCLOPHOSPHAMIDE FOR INJ 500 MG
10019095601	CYCLOPHOSPHAMIDE FOR INJ 1 GM
10019095616	CYCLOPHOSPHAMIDE FOR INJ 1 GM
10019095701	CYCLOPHOSPHAMIDE FOR INJ 2 GM
10019095711	CYCLOPHOSPHAMIDE FOR INJ 2 GM
10139006202	METHOTREXATE SODIUM INJ PF 50 MG/2ML (25 MG/ML)
10139006210	METHOTREXATE SODIUM INJ PF 250 MG/10ML (25 MG/ML)
10139006240	METHOTREXATE SODIUM INJ PF 1000 MG/40ML (25 MG/ML)
10695001614	CYCLOSPORINE (BULK) POWDER
10695001617	CYCLOSPORINE (BULK) POWDER
12280013930	AZATHIOPRINE TAB 50 MG
13811067730	LEFLUNOMIDE TAB 10 MG
13811067830	LEFLUNOMIDE TAB 20 MG
16714032101	LEFLUNOMIDE TAB 10 MG
16714033101	LEFLUNOMIDE TAB 20 MG
16729001901	MYCOPHENOLATE MOFETIL TAB 500 MG
16729001916	MYCOPHENOLATE MOFETIL TAB 500 MG
16729004101	TACROLIMUS CAP 0.5 MG
16729004201	TACROLIMUS CAP 1 MG
16729004301	TACROLIMUS CAP 5 MG
16729009401	MYCOPHENOLATE MOFETIL CAP 250 MG
16729009416	MYCOPHENOLATE MOFETIL CAP 250 MG
16729027703	METHOTREXATE SODIUM INJ PF 250 MG/10ML (25 MG/ML)
16729027730	METHOTREXATE SODIUM INJ PF 50 MG/2ML (25 MG/ML)
16729027735	METHOTREXATE SODIUM INJ PF 1000 MG/40ML (25 MG/ML)
21695011100	METHOTREXATE SODIUM TAB 2.5 MG (BASE EQUIV)
21695011130	METHOTREXATE SODIUM TAB 2.5 MG (BASE EQUIV)
21695017000	TACROLIMUS CAP 1 MG
21695017100	MYCOPHENOLATE MOFETIL CAP 250 MG
21695048475	AZATHIOPRINE TAB 50 MG
23155004303	LEFLUNOMIDE TAB 10 MG
23155004403	LEFLUNOMIDE TAB 20 MG
23490511009	AZATHIOPRINE TAB 50 MG
23490588900	METHOTREXATE SODIUM TAB 2.5 MG (BASE EQUIV)
23490941903	METHOTREXATE SODIUM TAB 2.5 MG (BASE EQUIV)
33261075800	AZATHIOPRINE TAB 50 MG
33261075830	AZATHIOPRINE TAB 50 MG
33261075860	AZATHIOPRINE TAB 50 MG
33261075890	AZATHIOPRINE TAB 50 MG
33261075920	METHOTREXATE SODIUM TAB 2.5 MG (BASE EQUIV)
33261075930	METHOTREXATE SODIUM TAB 2.5 MG (BASE EQUIV)
33261075940	METHOTREXATE SODIUM TAB 2.5 MG (BASE EQUIV)
33261075960	METHOTREXATE SODIUM TAB 2.5 MG (BASE EQUIV)
35356028000	SIROLIMUS TAB 1 MG
38779003503	METHOTREXATE POWDER
38779003504	METHOTREXATE POWDER
38779003506	METHOTREXATE POWDER
38779031203	AZATHIOPRINE POWDER
38779031204	AZATHIOPRINE POWDER
38779031206	AZATHIOPRINE POWDER
38779050603	CYCLOPHOSPHAMIDE (BULK) POWDER
38779050604	CYCLOPHOSPHAMIDE (BULK) POWDER
38779050605	CYCLOPHOSPHAMIDE (BULK) POWDER
38779066001	CYCLOSPORINE (BULK) POWDER
38779066003	CYCLOSPORINE (BULK) POWDER
38779066004	CYCLOSPORINE (BULK) POWDER
38779066005	CYCLOSPORINE (BULK) POWDER
38779066006	CYCLOSPORINE (BULK) POWDER
38779066008	CYCLOSPORINE (BULK) POWDER
38779115600	CHLORAMBUCIL (BULK) POWDER
38779115603	CHLORAMBUCIL (BULK) POWDER
38779115606	CHLORAMBUCIL (BULK) POWDER
38779115607	CHLORAMBUCIL (BULK) POWDER
38779142703	MERCAPTOPURINE (BULK) POWDER
38779142704	MERCAPTOPURINE (BULK) POWDER
38779142706	MERCAPTOPURINE (BULK) POWDER
42254011030	METHOTREXATE SODIUM TAB 2.5 MG (BASE EQUIV)
42291059401	METHOTREXATE SODIUM TAB 2.5 MG (BASE EQUIV)
43353017809	TACROLIMUS CAP 1 MG
43353017853	TACROLIMUS CAP 1 MG
43353017860	TACROLIMUS CAP 1 MG
43353017880	TACROLIMUS CAP 1 MG
43353068609	AZATHIOPRINE TAB 50 MG
43353068660	AZATHIOPRINE TAB 50 MG
43353074509	AZATHIOPRINE TAB 50 MG
43353074560	AZATHIOPRINE TAB 50 MG
47463003630	AZATHIOPRINE TAB 50 MG
49452078201	AZATHIOPRINE POWDER
49452078202	AZATHIOPRINE POWDER
49452078203	AZATHIOPRINE POWDER
49452078301	AZATHIOPRINE POWDER
49452078302	AZATHIOPRINE POWDER
49452078303	AZATHIOPRINE POWDER
49452191101	CHLORAMBUCIL (BULK) POWDER
49452191102	CHLORAMBUCIL (BULK) POWDER
49452240601	CYCLOPHOSPHAMIDE (BULK) POWDER
49452240602	CYCLOPHOSPHAMIDE (BULK) POWDER
49452241101	CYCLOSPORINE (BULK) POWDER
49452241102	CYCLOSPORINE (BULK) POWDER
49452241103	CYCLOSPORINE (BULK) POWDER
49452241104	CYCLOSPORINE (BULK) POWDER
49452446301	MERCAPTOPURINE MONOHYDRATE (BULK) POWDER
49452446302	MERCAPTOPURINE MONOHYDRATE (BULK) POWDER
49452446303	MERCAPTOPURINE MONOHYDRATE (BULK) POWDER
49452460001	METHOTREXATE POWDER
49452460002	METHOTREXATE POWDER
49452460003	METHOTREXATE POWDER
49452460102	METHOTREXATE POWDER
49452460103	METHOTREXATE POWDER
49452460104	METHOTREXATE POWDER
49884088805	LEFLUNOMIDE TAB 10 MG
49884088811	LEFLUNOMIDE TAB 10 MG
49884088905	LEFLUNOMIDE TAB 20 MG
49884088911	LEFLUNOMIDE TAB 20 MG
49884092202	MERCAPTOPURINE TAB 50 MG
49884092204	MERCAPTOPURINE TAB 50 MG
49999038024	METHOTREXATE SODIUM TAB 2.5 MG (BASE EQUIV)
49999038036	METHOTREXATE SODIUM TAB 2.5 MG (BASE EQUIV)
49999093600	MYCOPHENOLATE MOFETIL CAP 250 MG
49999093630	MYCOPHENOLATE MOFETIL CAP 250 MG
49999093730	MYCOPHENOLATE MOFETIL TAB 500 MG
50111088542	CYCLOSPORINE MODIFIED ORAL SOLN 100 MG/ML
50111090943	CYCLOSPORINE MODIFIED CAP 25 MG
50111092043	CYCLOSPORINE MODIFIED CAP 100 MG
50242005121	RITUXIMAB IV SOLN 100 MG/10ML
50242005306	RITUXIMAB IV SOLN 500 MG/50ML
50242013501	TOCILIZUMAB IV INJ 80 MG/4ML
50242013601	TOCILIZUMAB IV INJ 200 MG/10ML
50242013701	TOCILIZUMAB IV INJ 400 MG/20ML
50242013801	TOCILIZUMAB SUBCUTANEOUS SOLN PREFILLED SYRINGE 162 MG/0.9ML
50474070062	CERTOLIZUMAB PEGOL FOR INJ KIT 2 X 200 MG
50474071079	CERTOLIZUMAB PEGOL INJ KIT 2 X 200 MG/ML
50474071081	CERTOLIZUMAB PEGOL INJ KIT 6 X 200 MG/ML
50742020701	TACROLIMUS CAP 0.5 MG
50742020801	TACROLIMUS CAP 1 MG
50742020901	TACROLIMUS CAP 5 MG
51079002801	TACROLIMUS CAP 5 MG
51079002820	TACROLIMUS CAP 5 MG
51079037901	MYCOPHENOLATE MOFETIL TAB 500 MG
51079037920	MYCOPHENOLATE MOFETIL TAB 500 MG
51079050801	MYCOPHENOLATE SODIUM TAB DR 180 MG (MYCOPHENOLIC ACID EQUIV)
51079050820	MYCOPHENOLATE SODIUM TAB DR 180 MG (MYCOPHENOLIC ACID EQUIV)
51079050901	MYCOPHENOLATE SODIUM TAB DR 360 MG (MYCOPHENOLIC ACID EQUIV)
51079050920	MYCOPHENOLATE SODIUM TAB DR 360 MG (MYCOPHENOLIC ACID EQUIV)
51079062001	AZATHIOPRINE TAB 50 MG
51079062006	AZATHIOPRINE TAB 50 MG
51079067001	METHOTREXATE SODIUM TAB 2.5 MG (BASE EQUIV)
51079067005	METHOTREXATE SODIUM TAB 2.5 MG (BASE EQUIV)
51079072101	MYCOPHENOLATE MOFETIL CAP 250 MG
51079072120	MYCOPHENOLATE MOFETIL CAP 250 MG
51079081701	TACROLIMUS CAP 0.5 MG
51079081720	TACROLIMUS CAP 0.5 MG
51079081801	TACROLIMUS CAP 1 MG
51079081820	TACROLIMUS CAP 1 MG
51285036601	METHOTREXATE SODIUM TAB 5 MG (BASE EQUIV)
51285036701	METHOTREXATE SODIUM TAB 7.5 MG (BASE EQUIV)
51285036801	METHOTREXATE SODIUM TAB 10 MG (BASE EQUIV)
51285036901	METHOTREXATE SODIUM TAB 15 MG (BASE EQUIV)
51285050902	METHOTREXATE SODIUM TAB 2.5 MG (BASE EQUIV)
51552063301	CYCLOSPORINE (BULK) POWDER
51552066301	CYCLOSPORINE (BULK) POWDER
51552066302	CYCLOSPORINE (BULK) POWDER
51552066304	CYCLOSPORINE (BULK) POWDER
51552066305	CYCLOSPORINE (BULK) POWDER
51552066306	CYCLOSPORINE (BULK) POWDER
51552066309	CYCLOSPORINE (BULK) POWDER
51552077902	AZATHIOPRINE POWDER
51552077904	AZATHIOPRINE POWDER
51552077905	AZATHIOPRINE POWDER
51552105401	METHOTREXATE POWDER
51552105409	METHOTREXATE POWDER
51927156500	METHOTREXATE POWDER
51927200000	MERCAPTOPURINE MONOHYDRATE (BULK) POWDER
51927217700	CHLORAMBUCIL (BULK) POWDER
51927225800	AZATHIOPRINE POWDER
51927319600	CYCLOSPORINE (BULK) POWDER
51927426200	LEFLUNOMIDE (BULK) POWDER
51927442100	CYCLOPHOSPHAMIDE (BULK) POWDER
51927446700	CHLORAMBUCIL (BULK) POWDER
51927452000	LEFLUNOMIDE (BULK) POWDER
51927487100	CYCLOPHOSPHAMIDE (BULK) POWDER
52372072801	AZATHIOPRINE POWDER
52372072802	AZATHIOPRINE POWDER
52372072803	AZATHIOPRINE POWDER
52372072804	AZATHIOPRINE POWDER
52609000105	MELPHALAN TAB 2 MG
52609300100	MELPHALAN HCL FOR INJ 50 MG (BASE EQUIV)
52959007900	AZATHIOPRINE TAB 50 MG
52959024400	METHOTREXATE SODIUM TAB 2.5 MG (BASE EQUIV)
54436001002	METHOTREXATE SOLN PF AUTO-INJECTOR 10 MG/0.4ML
54436001004	METHOTREXATE SOLN PF AUTO-INJECTOR 10 MG/0.4ML
54436001502	METHOTREXATE SOLN PF AUTO-INJECTOR 15 MG/0.4ML
54436001504	METHOTREXATE SOLN PF AUTO-INJECTOR 15 MG/0.4ML
54436001704	METHOTREXATE SOLN PF AUTO-INJECTOR 17.5 MG/0.4ML
54436002002	METHOTREXATE SOLN PF AUTO-INJECTOR 20 MG/0.4ML
54436002004	METHOTREXATE SOLN PF AUTO-INJECTOR 20 MG/0.4ML
54436002204	METHOTREXATE SOLN PF AUTO-INJECTOR 22.5 MG/0.4ML
54436002502	METHOTREXATE SOLN PF AUTO-INJECTOR 25 MG/0.4ML
54436002504	METHOTREXATE SOLN PF AUTO-INJECTOR 25 MG/0.4ML
54436007504	METHOTREXATE SOLN PF AUTO-INJECTOR 7.5 MG/0.4ML
54569181800	METHOTREXATE SODIUM TAB 2.5 MG (BASE EQUIV)
54569181804	METHOTREXATE SODIUM TAB 2.5 MG (BASE EQUIV)
54569181809	METHOTREXATE SODIUM TAB 2.5 MG (BASE EQUIV)
54569452500	METHOTREXATE SODIUM INJ 25 MG/ML
54569494200	DACLIZUMAB FOR IV INJ CONC 25 MG/5ML
54569531600	METHOTREXATE SODIUM INJ 25 MG/ML
54569552400	ADALIMUMAB INJ KIT 40 MG/0.8ML (50 MG/ML)
54569571200	CYCLOPHOSPHAMIDE TAB 25 MG
54569571300	CYCLOPHOSPHAMIDE TAB 50 MG
54569662700	MYCOPHENOLATE MOFETIL TAB 500 MG
54569662800	TACROLIMUS CAP 1 MG
54868017300	METHOTREXATE SODIUM INJ 25 MG/ML
54868017301	METHOTREXATE SODIUM INJ 25 MG/ML
54868092101	AZATHIOPRINE TAB 50 MG
54868092102	AZATHIOPRINE TAB 50 MG
54868092104	AZATHIOPRINE TAB 50 MG
54868112600	CHLORAMBUCIL TAB 2 MG
54868112601	CHLORAMBUCIL TAB 2 MG
54868112602	CHLORAMBUCIL TAB 2 MG
54868112603	CHLORAMBUCIL TAB 2 MG
54868112604	CHLORAMBUCIL TAB 2 MG
54868112605	CHLORAMBUCIL TAB 2 MG
54868231900	LEFLUNOMIDE TAB 20 MG
54868382600	METHOTREXATE SODIUM TAB 2.5 MG (BASE EQUIV)
54868382601	METHOTREXATE SODIUM TAB 2.5 MG (BASE EQUIV)
54868382602	METHOTREXATE SODIUM TAB 2.5 MG (BASE EQUIV)
54868382603	METHOTREXATE SODIUM TAB 2.5 MG (BASE EQUIV)
54868382604	METHOTREXATE SODIUM TAB 2.5 MG (BASE EQUIV)
54868382605	METHOTREXATE SODIUM TAB 2.5 MG (BASE EQUIV)
54868382606	METHOTREXATE SODIUM TAB 2.5 MG (BASE EQUIV)
54868382607	METHOTREXATE SODIUM TAB 2.5 MG (BASE EQUIV)
54868382608	METHOTREXATE SODIUM TAB 2.5 MG (BASE EQUIV)
54868382609	METHOTREXATE SODIUM TAB 2.5 MG (BASE EQUIV)
54868433900	MELPHALAN TAB 2 MG
54868433901	MELPHALAN TAB 2 MG
54868433902	MELPHALAN TAB 2 MG
54868433903	MELPHALAN TAB 2 MG
54868433904	MELPHALAN TAB 2 MG
54868438500	LEFLUNOMIDE TAB 20 MG
54868471600	METHOTREXATE SODIUM INJ 25 MG/ML
54868478200	ETANERCEPT FOR SUBCUTANEOUS INJ 25 MG
54868479600	METHOTREXATE SODIUM INJ 25 MG/ML
54868482200	ADALIMUMAB PREFILLED SYRINGE KIT 40 MG/0.8ML
54868490200	LEFLUNOMIDE TAB 10 MG
54868500500	CYCLOPHOSPHAMIDE TAB 50 MG
54868500501	CYCLOPHOSPHAMIDE TAB 50 MG
54868521800	CYCLOPHOSPHAMIDE TAB 25 MG
54868521801	CYCLOPHOSPHAMIDE TAB 25 MG
54868521802	CYCLOPHOSPHAMIDE TAB 25 MG
54868528200	MERCAPTOPURINE TAB 50 MG
54868528201	MERCAPTOPURINE TAB 50 MG
54868528202	MERCAPTOPURINE TAB 50 MG
54868531000	AZATHIOPRINE TAB 50 MG
54868531001	AZATHIOPRINE TAB 50 MG
54868531002	AZATHIOPRINE TAB 50 MG
54868531003	AZATHIOPRINE TAB 50 MG
54868531004	AZATHIOPRINE TAB 50 MG
54868544400	ETANERCEPT SUBCUTANEOUS SOLN PREFILLED SYRINGE 50 MG/ML
54868552200	CYCLOSPORINE CAP 100 MG
54868617000	LEFLUNOMIDE TAB 10 MG
54868623200	CYCLOSPORINE MODIFIED CAP 100 MG
55045347101	AZATHIOPRINE TAB 50 MG
55048003630	AZATHIOPRINE TAB 50 MG
55111052501	TACROLIMUS CAP 0.5 MG
55111052601	TACROLIMUS CAP 1 MG
55111052701	TACROLIMUS CAP 5 MG
55111065301	SIROLIMUS TAB 1 MG
55111065401	SIROLIMUS TAB 2 MG
55289092430	METHOTREXATE SODIUM TAB 2.5 MG (BASE EQUIV)
55292091151	MECHLORETHAMINE HCL FOR INJ 10 MG
55390003110	METHOTREXATE SODIUM INJ PF 50 MG/2ML (25 MG/ML)
55390003210	METHOTREXATE SODIUM INJ PF 100 MG/4ML (25 MG/ML)
55390003310	METHOTREXATE SODIUM INJ PF 200 MG/8ML (25 MG/ML)
55390003410	METHOTREXATE SODIUM INJ PF 250 MG/10ML (25 MG/ML)
55390012210	CYCLOSPORINE IV SOLN 50 MG/ML
55390014301	METHOTREXATE SODIUM FOR INJ 1 GM
55390060020	AZATHIOPRINE SODIUM FOR INJ 100 MG
55513017701	ANAKINRA SUBCUTANEOUS INJ 100 MG/0.67ML
55513017707	ANAKINRA SUBCUTANEOUS INJ 100 MG/0.67ML
55513017728	ANAKINRA SUBCUTANEOUS INJ 100 MG/0.67ML
57844052206	MERCAPTOPURINE TAB 50 MG
57844052207	MERCAPTOPURINE TAB 50 MG
57844052252	MERCAPTOPURINE TAB 50 MG
57866902101	AZATHIOPRINE TAB 50 MG
57894003001	INFLIXIMAB FOR IV INJ 100 MG
57894006002	USTEKINUMAB INJ 45 MG/0.5ML
57894006003	USTEKINUMAB SOLN PREFILLED SYRINGE 45 MG/0.5ML
57894006103	USTEKINUMAB SOLN PREFILLED SYRINGE 90 MG/ML
57894007001	GOLIMUMAB SUBCUTANEOUS SOLN PREFILLED SYRINGE 50 MG/0.5ML
57894007002	GOLIMUMAB SUBCUTANEOUS SOLN AUTO-INJECTOR 50 MG/0.5ML
57894007101	GOLIMUMAB SUBCUTANEOUS SOLN PREFILLED SYRINGE 100 MG/ML
57894007102	GOLIMUMAB SUBCUTANEOUS SOLN AUTO-INJECTOR 100 MG/ML
57894035001	GOLIMUMAB IV SOLN 50 MG/4ML
58118001401	METHOTREXATE SODIUM TAB 2.5 MG (BASE EQUIV)
58118994802	ADALIMUMAB PEN-INJECTOR KIT 40 MG/0.8ML
58406042534	ETANERCEPT FOR SUBCUTANEOUS INJ 25 MG
58406042541	ETANERCEPT FOR SUBCUTANEOUS INJ 25 MG
58406043501	ETANERCEPT SUBCUTANEOUS SOLN PREFILLED SYRINGE 50 MG/ML
58406043504	ETANERCEPT SUBCUTANEOUS SOLN PREFILLED SYRINGE 50 MG/ML
58406044501	ETANERCEPT SUBCUTANEOUS SOLUTION AUTO-INJECTOR 50 MG/ML
58406044504	ETANERCEPT SUBCUTANEOUS SOLUTION AUTO-INJECTOR 50 MG/ML
58406045501	ETANERCEPT SUBCUTANEOUS SOLN PREFILLED SYRINGE 25 MG/0.5ML
58406045504	ETANERCEPT SUBCUTANEOUS SOLN PREFILLED SYRINGE 25 MG/0.5ML
58406067105	METHOTREXATE SODIUM FOR INJ 1 GM
58406067301	METHOTREXATE SODIUM FOR INJ 20 MG
58406068114	METHOTREXATE SODIUM INJ 25 MG/ML
58406068117	METHOTREXATE SODIUM INJ 25 MG/ML
58406068315	METHOTREXATE SODIUM INJ 25 MG/ML
58406068316	METHOTREXATE SODIUM INJ 25 MG/ML
58406068318	METHOTREXATE SODIUM INJ 25 MG/ML
58468008001	ANTI-THYMOCYTE GLOBULIN FOR IV SOLN 25 MG (LYMPHOCYTE IG)
58597821001	CYCLOSPORINE (BULK) POWDER
58597821002	CYCLOSPORINE (BULK) POWDER
58597821003	CYCLOSPORINE (BULK) POWDER
58597821004	CYCLOSPORINE (BULK) POWDER
58597821006	CYCLOSPORINE (BULK) POWDER
58597821007	CYCLOSPORINE (BULK) POWDER
59075073015	NATALIZUMAB FOR IV INJ CONC 300 MG/15ML
59137050501	METHOTREXATE SOLN PF AUTO-INJECTOR 7.5 MG/0.15ML
59137050504	METHOTREXATE SOLN PF AUTO-INJECTOR 7.5 MG/0.15ML
59137051001	METHOTREXATE SOLN PF AUTO-INJECTOR 10 MG/0.2ML
59137051004	METHOTREXATE SOLN PF AUTO-INJECTOR 10 MG/0.2ML
59137051501	METHOTREXATE SOLN PF AUTO-INJECTOR 12.5 MG/0.25ML
59137051504	METHOTREXATE SOLN PF AUTO-INJECTOR 12.5 MG/0.25ML
59137052001	METHOTREXATE SOLN PF AUTO-INJECTOR 15 MG/0.3ML
59137052004	METHOTREXATE SOLN PF AUTO-INJECTOR 15 MG/0.3ML
59137052501	METHOTREXATE SOLN PF AUTO-INJECTOR 17.5 MG/0.35ML
59137052504	METHOTREXATE SOLN PF AUTO-INJECTOR 17.5 MG/0.35ML
59137053001	METHOTREXATE SOLN PF AUTO-INJECTOR 20 MG/0.4ML
59137053004	METHOTREXATE SOLN PF AUTO-INJECTOR 20 MG/0.4ML
59137053501	METHOTREXATE SOLN PF AUTO-INJECTOR 22.5 MG/0.45ML
59137053504	METHOTREXATE SOLN PF AUTO-INJECTOR 22.5 MG/0.45ML
59137054001	METHOTREXATE SOLN PF AUTO-INJECTOR 25 MG/0.5ML
59137054004	METHOTREXATE SOLN PF AUTO-INJECTOR 25 MG/0.5ML
59137054501	METHOTREXATE SOLN PF AUTO-INJECTOR 27.5 MG/0.55ML
59137054504	METHOTREXATE SOLN PF AUTO-INJECTOR 27.5 MG/0.55ML
59137055001	METHOTREXATE SOLN PF AUTO-INJECTOR 30 MG/0.6ML
59137055004	METHOTREXATE SOLN PF AUTO-INJECTOR 30 MG/0.6ML
59572030101	MELPHALAN HCL FOR INJ 50 MG (BASE EQUIV)
59572030250	MELPHALAN TAB 2 MG
59676010101	MUROMONAB CD3 INJ 1 MG/ML
59762070201	MYCOPHENOLATE MOFETIL TAB 500 MG
59762070203	MYCOPHENOLATE MOFETIL TAB 500 MG
59762070301	MYCOPHENOLATE MOFETIL CAP 250 MG
59762070302	MYCOPHENOLATE MOFETIL CAP 250 MG
59762070303	MYCOPHENOLATE MOFETIL CAP 250 MG
59762100101	SIROLIMUS TAB 0.5 MG
59762100201	SIROLIMUS TAB 1 MG
59762100301	SIROLIMUS TAB 2 MG
59911587401	METHOTREXATE SODIUM TAB 2.5 MG (BASE EQUIV)
60429001612	MYCOPHENOLATE SODIUM TAB DR 180 MG (MYCOPHENOLIC ACID EQUIV)
60429001712	MYCOPHENOLATE SODIUM TAB DR 360 MG (MYCOPHENOLIC ACID EQUIV)
60429005901	MYCOPHENOLATE MOFETIL CAP 250 MG
60429005905	MYCOPHENOLATE MOFETIL CAP 250 MG
60429007001	MYCOPHENOLATE MOFETIL TAB 500 MG
60429007005	MYCOPHENOLATE MOFETIL TAB 500 MG
60429008036	METHOTREXATE SODIUM TAB 2.5 MG (BASE EQUIV)
60429031930	LEFLUNOMIDE TAB 10 MG
60429032030	LEFLUNOMIDE TAB 20 MG
60429037701	TACROLIMUS CAP 0.5 MG
60429037801	TACROLIMUS CAP 1 MG
60429037901	TACROLIMUS CAP 5 MG
60432014050	CYCLOSPORINE ORAL SOLN 100 MG/ML
60505013300	CYCLOSPORINE CAP 25 MG
60505013400	CYCLOSPORINE CAP 100 MG
60505035401	CYCLOSPORINE MODIFIED ORAL SOLN 100 MG/ML
60505250201	LEFLUNOMIDE TAB 10 MG
60505250203	LEFLUNOMIDE TAB 10 MG
60505250301	LEFLUNOMIDE TAB 20 MG
60505250303	LEFLUNOMIDE TAB 20 MG
60505296507	MYCOPHENOLATE SODIUM TAB DR 180 MG (MYCOPHENOLIC ACID EQUIV)
60505296607	MYCOPHENOLATE SODIUM TAB DR 360 MG (MYCOPHENOLIC ACID EQUIV)
60505296701	MYCOPHENOLATE MOFETIL TAB 500 MG
60505296705	MYCOPHENOLATE MOFETIL TAB 500 MG
60505296707	MYCOPHENOLATE MOFETIL TAB 500 MG
60505296801	MYCOPHENOLATE MOFETIL CAP 250 MG
60505296805	MYCOPHENOLATE MOFETIL CAP 250 MG
60505296807	MYCOPHENOLATE MOFETIL CAP 250 MG
60951073470	MYCOPHENOLATE MOFETIL CAP 250 MG
60951073485	MYCOPHENOLATE MOFETIL CAP 250 MG
60951073570	MYCOPHENOLATE MOFETIL TAB 500 MG
60951073585	MYCOPHENOLATE MOFETIL TAB 500 MG
60976059755	AZATHIOPRINE TAB 50 MG
60976059871	AZATHIOPRINE SODIUM FOR INJ 100 MG
61703035010	METHOTREXATE SODIUM INJ 50 MG/2ML (25 MG/ML)
61703035038	METHOTREXATE SODIUM INJ 50 MG/2ML (25 MG/ML)
61703040707	METHOTREXATE SODIUM INJ 25 MG/ML
61703040732	METHOTREXATE SODIUM INJ 25 MG/ML
61703040804	METHOTREXATE SODIUM INJ 25 MG/ML
61703040807	METHOTREXATE SODIUM INJ 25 MG/ML
61703040813	METHOTREXATE SODIUM INJ 25 MG/ML
61703040822	METHOTREXATE SODIUM INJ 25 MG/ML
61703040825	METHOTREXATE SODIUM INJ PF 1000 MG/40ML (25 MG/ML)
61703040832	METHOTREXATE SODIUM INJ 25 MG/ML
61703040841	METHOTREXATE SODIUM INJ PF 1000 MG/40ML (25 MG/ML)
61703040858	METHOTREXATE SODIUM INJ 25 MG/ML
62053053425	ANTI-THYMOCYTE GLOBULIN FOR IV SOLN 25 MG (LYMPHOCYTE IG)
62175038037	TACROLIMUS CAP 0.5 MG
62175038137	TACROLIMUS CAP 1 MG
62175038237	TACROLIMUS CAP 5 MG
62484002001	MERCAPTOPURINE SUSP 2000 MG/100ML (20 MG/ML)
62584082711	CYCLOSPORINE CAP 100 MG
62584082721	CYCLOSPORINE CAP 100 MG
62701094036	METHOTREXATE SODIUM TAB 2.5 MG (BASE EQUIV)
62701094099	METHOTREXATE SODIUM TAB 2.5 MG (BASE EQUIV)
62991120001	METHOTREXATE POWDER
62991120002	METHOTREXATE POWDER
62991120004	METHOTREXATE POWDER
62991120005	METHOTREXATE POWDER
62991153301	CYCLOSPORINE (BULK) POWDER
62991153302	CYCLOSPORINE (BULK) POWDER
62991153303	CYCLOSPORINE (BULK) POWDER
62991153305	CYCLOSPORINE (BULK) POWDER
62991153310	CYCLOSPORINE (BULK) POWDER
62991162501	CYCLOPHOSPHAMIDE (BULK) POWDER
62991162502	CYCLOPHOSPHAMIDE (BULK) POWDER
62991162503	CYCLOPHOSPHAMIDE (BULK) POWDER
62991218901	AZATHIOPRINE POWDER
62991218903	AZATHIOPRINE POWDER
62991218904	AZATHIOPRINE POWDER
62991289901	MERCAPTOPURINE MONOHYDRATE (BULK) POWDER
62991289902	MERCAPTOPURINE MONOHYDRATE (BULK) POWDER
62991289903	MERCAPTOPURINE MONOHYDRATE (BULK) POWDER
63307013101	CYCLOSPORINE (BULK) POWDER
63307013105	CYCLOSPORINE (BULK) POWDER
63307013111	CYCLOSPORINE (BULK) POWDER
63307013115	CYCLOSPORINE (BULK) POWDER
63307013137	CYCLOSPORINE (BULK) POWDER
63323012102	METHOTREXATE SODIUM INJ PF 50 MG/2ML (25 MG/ML)
63323012104	METHOTREXATE SODIUM INJ PF 100 MG/4ML (25 MG/ML)
63323012108	METHOTREXATE SODIUM INJ PF 200 MG/8ML (25 MG/ML)
63323012110	METHOTREXATE SODIUM INJ PF 250 MG/10ML (25 MG/ML)
63323012140	METHOTREXATE SODIUM INJ PF 25 MG/ML
63323012250	METHOTREXATE SODIUM FOR INJ 1 GM
63323012259	METHOTREXATE SODIUM FOR INJ 1 GM
63323012302	METHOTREXATE SODIUM INJ 25 MG/ML
63323012310	METHOTREXATE SODIUM INJ 250 MG/10ML (25 MG/ML)
63323014210	IFOSFAMIDE FOR INJ 1 GM
63323014212	IFOSFAMIDE FOR INJ 1 GM
63323017420	IFOSFAMIDE IV INJ 1 GM/20ML (50 MG/ML)
63323017460	IFOSFAMIDE IV INJ 3 GM/60ML (50 MG/ML)
63370002510	AZATHIOPRINE POWDER
63370002515	AZATHIOPRINE POWDER
63370002525	AZATHIOPRINE POWDER
63370002535	AZATHIOPRINE POWDER
63370005710	CYCLOSPORINE (BULK) POWDER
63370005715	CYCLOSPORINE (BULK) POWDER
63370005725	CYCLOSPORINE (BULK) POWDER
63370005735	CYCLOSPORINE (BULK) POWDER
63370005745	CYCLOSPORINE (BULK) POWDER
63370015410	METHOTREXATE POWDER
63370015415	METHOTREXATE POWDER
63370015425	METHOTREXATE POWDER
63629126301	LEFLUNOMIDE TAB 20 MG
63629147201	METHOTREXATE SODIUM TAB 2.5 MG (BASE EQUIV)
63629147202	METHOTREXATE SODIUM TAB 2.5 MG (BASE EQUIV)
64380072006	TACROLIMUS CAP 0.5 MG
64380072106	TACROLIMUS CAP 1 MG
64380072206	TACROLIMUS CAP 5 MG
64380072506	MYCOPHENOLATE MOFETIL TAB 500 MG
64380072507	MYCOPHENOLATE MOFETIL TAB 500 MG
64380072606	MYCOPHENOLATE MOFETIL CAP 250 MG
64380072607	MYCOPHENOLATE MOFETIL CAP 250 MG
64406000801	NATALIZUMAB FOR IV INJ CONC 300 MG/15ML
64764030020	VEDOLIZUMAB FOR IV SOLUTION 300 MG
65483055101	AZATHIOPRINE SODIUM FOR INJ 100 MG
65483059010	AZATHIOPRINE TAB 50 MG
65649023141	AZATHIOPRINE TAB 75 MG
65649024141	AZATHIOPRINE TAB 100 MG
66336006860	AZATHIOPRINE TAB 50 MG
66336033821	METHOTREXATE SODIUM TAB 2.5 MG (BASE EQUIV)
66336033830	METHOTREXATE SODIUM TAB 2.5 MG (BASE EQUIV)
66479013501	METHOTREXATE SODIUM INJ 25 MG/ML
66479013509	METHOTREXATE SODIUM INJ 25 MG/ML
66479013611	METHOTREXATE SODIUM INJ PF 25 MG/ML
66479013613	METHOTREXATE SODIUM INJ PF 25 MG/ML
66479013619	METHOTREXATE SODIUM INJ PF 25 MG/ML
66479013721	METHOTREXATE SODIUM FOR INJ 20 MG
66479013929	METHOTREXATE SODIUM FOR INJ 1 GM
66479030110	AZATHIOPRINE TAB 50 MG
66591022141	AZATHIOPRINE TAB 50 MG
66591023141	AZATHIOPRINE TAB 75 MG
66591024141	AZATHIOPRINE TAB 100 MG
66658023401	ANAKINRA SUBCUTANEOUS SOLN PREFILLED SYRINGE 100 MG/0.67ML
66658023407	ANAKINRA SUBCUTANEOUS SOLN PREFILLED SYRINGE 100 MG/0.67ML
66658023428	ANAKINRA SUBCUTANEOUS SOLN PREFILLED SYRINGE 100 MG/0.67ML
66758004001	METHOTREXATE SODIUM INJ PF 25 MG/ML
66758004002	METHOTREXATE SODIUM INJ PF 25 MG/ML
66758004008	METHOTREXATE SODIUM INJ PF 25 MG/ML
66758004101	METHOTREXATE SODIUM INJ PF 1000 MG/40ML (25 MG/ML)
66993016030	LEFLUNOMIDE TAB 10 MG
66993016130	LEFLUNOMIDE TAB 20 MG
67253032010	METHOTREXATE SODIUM TAB 2.5 MG (BASE EQUIV)
67253032036	METHOTREXATE SODIUM TAB 2.5 MG (BASE EQUIV)
67253058042	METHOTREXATE SODIUM TAB 2.5 MG (ANTIRHEUMATIC)
67253058043	METHOTREXATE SODIUM TAB 2.5 MG (ANTIRHEUMATIC)
67253058044	METHOTREXATE SODIUM TAB 2.5 MG (ANTIRHEUMATIC)
67253058045	METHOTREXATE SODIUM TAB 2.5 MG (ANTIRHEUMATIC)
67253058046	METHOTREXATE SODIUM TAB 2.5 MG (ANTIRHEUMATIC)
67386091151	MECHLORETHAMINE HCL FOR INJ 10 MG
67457019501	MELPHALAN HCL FOR INJ 50 MG (BASE EQUIV)
67457021501	MELPHALAN HCL FOR INJ 50 MG (BASE EQUIV)
67457022102	METHOTREXATE SODIUM INJ PF 50 MG/2ML (25 MG/ML)
67457022110	METHOTREXATE SODIUM INJ PF 250 MG/10ML (25 MG/ML)
67457022140	METHOTREXATE SODIUM INJ PF 1000 MG/40ML (25 MG/ML)
67457042920	IFOSFAMIDE IV INJ 1 GM/20ML (50 MG/ML)
67457044360	IFOSFAMIDE IV INJ 3 GM/60ML (50 MG/ML)
67457046610	METHOTREXATE SODIUM INJ PF 250 MG/10ML (25 MG/ML)
67457046721	METHOTREXATE SODIUM INJ PF 50 MG/2ML (25 MG/ML)
67457046799	METHOTREXATE SODIUM INJ PF 50 MG/2ML (25 MG/ML)
67457048040	METHOTREXATE SODIUM INJ PF 1000 MG/40ML (25 MG/ML)
67457048508	METHOTREXATE SODIUM INJ PF 200 MG/8ML (25 MG/ML)
67457048599	METHOTREXATE SODIUM INJ PF 200 MG/8ML (25 MG/ML)
67457048699	METHOTREXATE SODIUM INJ PF 100 MG/4ML (25 MG/ML)
67457057901	MELPHALAN HCL FOR INJ 50 MG (BASE EQUIV)
67457060920	IFOSFAMIDE IV INJ 1 GM/20ML (50 MG/ML)
67544120553	TACROLIMUS CAP 1 MG
67544120560	TACROLIMUS CAP 1 MG
67544120580	TACROLIMUS CAP 1 MG
67877022501	MYCOPHENOLATE MOFETIL TAB 500 MG
67877022505	MYCOPHENOLATE MOFETIL TAB 500 MG
67877023022	MYCOPHENOLATE MOFETIL FOR ORAL SUSP 200 MG/ML
67877026601	MYCOPHENOLATE MOFETIL CAP 250 MG
67877026605	MYCOPHENOLATE MOFETIL CAP 250 MG
68084017701	MYCOPHENOLATE MOFETIL CAP 250 MG
68084017711	MYCOPHENOLATE MOFETIL CAP 250 MG
68084017801	MYCOPHENOLATE MOFETIL TAB 500 MG
68084017811	MYCOPHENOLATE MOFETIL TAB 500 MG
68084022901	AZATHIOPRINE TAB 50 MG
68084022911	AZATHIOPRINE TAB 50 MG
68084032511	MERCAPTOPURINE TAB 50 MG
68084032521	MERCAPTOPURINE TAB 50 MG
68084044901	TACROLIMUS CAP 0.5 MG
68084044911	TACROLIMUS CAP 0.5 MG
68084045001	TACROLIMUS CAP 1 MG
68084045011	TACROLIMUS CAP 1 MG
68084045101	TACROLIMUS CAP 5 MG
68084045111	TACROLIMUS CAP 5 MG
68084058701	MYCOPHENOLATE MOFETIL CAP 250 MG
68084058711	MYCOPHENOLATE MOFETIL CAP 250 MG
68084058801	MYCOPHENOLATE MOFETIL TAB 500 MG
68084058811	MYCOPHENOLATE MOFETIL TAB 500 MG
68084079501	MYCOPHENOLATE MOFETIL CAP 250 MG
68084079511	MYCOPHENOLATE MOFETIL CAP 250 MG
68084080101	MYCOPHENOLATE MOFETIL TAB 500 MG
68084080111	MYCOPHENOLATE MOFETIL TAB 500 MG
68084087925	CYCLOSPORINE CAP 25 MG
68084087995	CYCLOSPORINE CAP 25 MG
68084090711	MYCOPHENOLATE SODIUM TAB DR 180 MG (MYCOPHENOLIC ACID EQUIV)
68084090721	MYCOPHENOLATE SODIUM TAB DR 180 MG (MYCOPHENOLIC ACID EQUIV)
68084091525	SIROLIMUS TAB 1 MG
68084091595	SIROLIMUS TAB 1 MG
68084091825	MYCOPHENOLATE SODIUM TAB DR 360 MG (MYCOPHENOLIC ACID EQUIV)
68084091895	MYCOPHENOLATE SODIUM TAB DR 360 MG (MYCOPHENOLIC ACID EQUIV)
68084092125	CYCLOSPORINE CAP 100 MG
68084092195	CYCLOSPORINE CAP 100 MG
68084095625	SIROLIMUS TAB 0.5 MG
68084095695	SIROLIMUS TAB 0.5 MG
68115063200	METHOTREXATE SODIUM TAB 2.5 MG (BASE EQUIV)
68115081730	LEFLUNOMIDE TAB 20 MG
68152010900	MELPHALAN HCL FOR INJ 50 MG (PROPYLENE GLYCOL (PG) FREE)
68258299203	LEFLUNOMIDE TAB 20 MG
68258905201	MYCOPHENOLATE MOFETIL TAB 500 MG
68258907301	MYCOPHENOLATE MOFETIL CAP 250 MG
68258909901	TACROLIMUS CAP 0.5 MG
68258910301	MERCAPTOPURINE TAB 50 MG
68382000301	AZATHIOPRINE TAB 50 MG
68382000305	AZATHIOPRINE TAB 50 MG
68382013001	MYCOPHENOLATE MOFETIL CAP 250 MG
68382013005	MYCOPHENOLATE MOFETIL CAP 250 MG
68382013010	MYCOPHENOLATE MOFETIL CAP 250 MG
68382013019	MYCOPHENOLATE MOFETIL CAP 250 MG
68382013101	MYCOPHENOLATE MOFETIL TAB 500 MG
68382013105	MYCOPHENOLATE MOFETIL TAB 500 MG
68382013110	MYCOPHENOLATE MOFETIL TAB 500 MG
68382052001	SIROLIMUS TAB 0.5 MG
68462050201	AZATHIOPRINE TAB 50 MG
68992301001	TACROLIMUS TAB SR 24HR 1 MG
68992301003	TACROLIMUS TAB SR 24HR 1 MG
68992304001	TACROLIMUS TAB SR 24HR 4 MG
68992304003	TACROLIMUS TAB SR 24HR 4 MG
68992307501	TACROLIMUS TAB SR 24HR 0.75 MG
68992307503	TACROLIMUS TAB SR 24HR 0.75 MG
69238107601	AZATHIOPRINE TAB 50 MG
69452015320	TACROLIMUS CAP 0.5 MG
69452015420	TACROLIMUS CAP 1 MG
69452015520	TACROLIMUS CAP 5 MG
76388063550	CHLORAMBUCIL TAB 2 MG

## Sheet: History or Late Effects of TB
History of or late effects of TB
An individual was considered to have had this condition if any of the following diagnosis
codes were present on at least one claim.
137.0	LATE EFFECTS OF RESPIRATORY OR UNSPECIFIED TUBERCULOSIS
137.1	LATE EFFECTS OF CENTRAL NERVOUS SYSTEM TUBERCULOSIS
137.2	LATE EFFECTS OF GENITOURINARY TUBERCULOSIS
137.3	LATE EFFECTS OF TUBERCULOSIS OF BONES AND JOINTS
137.4	LATE EFFECTS OF TUBERCULOSIS OF OTHER SPECIFIED ORGANS
V12.01	PERSONAL HISTORY OF TUBERCULOSIS

## Sheet: Contact with TB
Contact with or exposure to TB
An individual was considered to have had this condition if this diagnosis
was present on at least one claim.
V01.1	CONTACT WITH OR EXPOSURE TO TUBERCULOSIS

## Sheet: Diagnostic Test Type
LTBI Diagnostic Test Type
The LTBI diagnostic test type was based on the presence of a CPT code on at least one claim in the 6 months prior to treatment initiation (see codes below).
If no TST or IGRA CPT code was present in the 6 months prior to treatment initiation, the person was categorized as having an "unknown/other" test.
If both a TST and an IGRA code were present in the 6 months prior to treatment initiation on two different dates (N=75; 7%), the temporally first test
was used for the categorization. If both a TST and an IGRA code were present in the 6 months prior to treatment initiation and they occurred on the same
date (N=2; 0.2%), the the person was categorized as having an "unknown/other" test. "Other/unknown" tests were further stratified based on the presence
of CPT codes for other tests that may be used to identify Mycobacterium tuberculosis (Mtb) or a diagnosis code indicating that a medical encounter
involved TB/LTBI screening.
Code Type	Code	Description	Interpreted As	Subcategorized As
CPT Code	86580	SKIN TEST; TUBERCULOSIS, INTRADERMAL	TST	TST
CPT Code	86585	SKIN TEST; TUBERCULOSIS, TINE TEST	TST	TST
CPT Code	86480	TB CELL MEDIATED ANTIGN RESPNSE GAMMA INTERFER	IGRA	IGRA
CPT Code	0010T	TB CELL MEDIATED ANTIGN RESPNSE GAMMA INTERFER	IGRA	IGRA
CPT Code	86481	TB ANTIGEN RESPONSE GAMMA INTERFERON T-CELL SUSP	IGRA	IGRA
CPT Code	87555	INFECTIOUS AGENT, NUCLEIC ACID (DNA/RNA); MYCOBACTERIA TB, DIRECT PROBE	Other/Unknown	Other
CPT Code	87556	INFECTIOUS AGENT, NUCLEIC ACID (DNA/RNA); MYCOBACTERIA TB, AMPLIFIED PROBE	Other/Unknown	Other
CPT Code	87557	INFECTIOUS AGENT, NUCLEIC ACID (DNA/RNA); MYCOBACTERIA TB, QUANTIFICATION	Other/Unknown	Other
CPT Code	87116	CULTURE TUBERCLE/OTH ACID-FAST BACILLI ANY ISOL	Other/Unknown	Other
CPT Code	87118	CULTURE, MYCOBACTERIAL, DEFINITIVE ID, EA ISOLATE	Other/Unknown	Other
CPT Code	87143	CULTURE TYPING GAS/HIGH PRES LIQ CHROMATOGRAPHY	Other/Unknown	Other
CPT Code	87149	CULTURE, TYPING; ID BY NUCLEIC ACID PROBE	Other/Unknown	Other
CPT Code	87150	CULTYP NUC ACID AMP PRB CULT/ISOLATE EA ORGNISM	Other/Unknown	Other
CPT Code	87153	CULTYP NUCLEIC ACID SEQUENCING METH EA ISOLATE	Other/Unknown	Other
CPT Code	87158	CULTURE, TYPING; OTHER METHODS	Other/Unknown	Other
CPT Code	87550	INFECTIOUS AGENT, NUCLEIC ACID (DNA/RNA); MYCOBACTERIA SPECIES, DIRECT PROBE	Other/Unknown	Other
CPT Code	87551	INFECTIOUS AGENT, NUCLEIC ACID (DNA/RNA); MYCOBACTERIA SPECIES, AMPLIFIED PROBE	Other/Unknown	Other
CPT Code	87552	INFECTIOUS AGENT, NUCLEIC ACID (DNA/RNA); MYCOBACTERIA SPECIES, QUANTIFICATION	Other/Unknown	Other
CPT Code	87798	INFECTIOUS AGENT, NUCLEIC ACID (DNA/RNA), NOS; AMPLIFIED PROBE TECHNIQUE, EA ORGANISM	Other/Unknown	Other
CPT Code	87799	INFECTIOUS AGENT, NUCLEIC ACID (DNA/RNA), NOS; QUANTIFICATION, EA ORGANISM	Other/Unknown	Other
Diagnosis code	V74.1	Screening examination for pulmonary tuberculosis	Other/Unknown	V code
