# Supplementary material for: Predictors of latent tuberculosis infection treatment completion in the US private sector: an analysis of administrative claims data
Source: BMC Public Health. 2018 May 29;18:662. doi: 10.1186/s12889-018-5578-3 (PMC5975486; doi:10.1186/s12889-018-5578-3)
Supplement: Supplementary file 2 — Results of a logistic regression model which examines associations between patient characteristics and the completion of ≥6 months of daily-dose isoniazid treatment for latent tuberculosis infection (N = 1072). (XLSX 11 kb) [file 12889_2018_5578_MOESM2_ESM.xlsx]

## Sheet: Sheet1
Additional File 2: Results of logistic regression model which examines associations between patient characteristics and the completion* of ≥6 months of daily-dose isoniazid treatment for latent tuberculosis infection (N=1,072). The results below are not shown within the manuscript due to redundance with results shown in Table 3. The model detailed below was used to generate importance estimates i…
Variables		Odds Ratio	Significance	Coefficient	Standard Error
Sex	Female	1
	Male	1.094	0.492	0.09	0.131
Age Group	0-14	1
	15-29	0.581	0.025	-0.543	0.243
	30-44	0.636	0.059	-0.452	0.24
	45-64	0.57	0.026	-0.561	0.252
Census Region	Northeast	1
	Midwest	0.917	0.729	-0.087	0.252
	South	0.722	0.158	-0.326	0.231
	West	0.992	0.969	-0.008	0.205
Urban-Rural Classification	Large central metro	1
	Large fringe metro	0.576	0.005	-0.551	0.197
	Any smaller county	0.737	0.196	-0.306	0.236
% of Households Under FPL	<15%	1
	≥15	0.615	0.002	-0.487	0.16
Insurance Type	HMO	1
	POS	1.462	0.06	0.38	0.202
	PPO	1.878	0.008	0.63	0.239
Prescription Size	<2 Months Supply	1
	≥2 Months Supply	1.356	0.21	0.304	0.243
Year INH Regimen Started	2011 Q3-4	1
	2012 Q1-4	1.032	0.856	0.032	0.174
	2013 Q1-4	1.241	0.233	0.216	0.182
	2014 Q1	1.251	0.504	0.224	0.335
State TB Rate		0.903	0.16	-0.102	0.072
LTBI Diagnostic Test	TST	1
	IGRA	1.129	0.516	0.121	0.187
	Unknown/Other	0.842	0.245	-0.172	0.148
% Foreign Born in County		1.001	0.873	0.001	0.008
Diagnosis of Contact with TB	No diagnosis	1
	Had diagnosis	1.252	0.222	0.225	0.184
HIV Positive	No diagnosis	1
	Had diagnosis	2.714	0.006	0.998	0.361
Diabetes	No diagnosis or medication	1
	Had diagnosis or medication	1.441	0.165	0.366	0.263
Tobacco	No diagnosis or medication	1
	Had diagnosis or medication	1.192	0.513	0.176	0.268
History of TB/Late Effects	No diagnosis	1
	Had diagnosis	1.38	0.312	0.322	0.319
Immuno-supressive Medications	No medication	1
	Had medication	1.589	0.032	0.463	0.216
Constant		1.781	0.233	0.577	0.484
Abbreviations:
INH - isoniazid
FPL - federal poverty level
TB - tuberculosis
TST - tuberculin skin test
IGRA - interferon-gamma release assays
LTBI - latent tuberculosis infection
HMO - health maintenance organization
POS - point of service
PPO - preferred provider organization
